# Supplementary material for: Developmental timing of programmed DNA elimination in Paramecium tetraurelia recapitulates germline transposon evolutionary dynamics
Source: HighWire-hosted journal article supplement (doi:10.1101/gr.277027.122), 2022-11-01
Supplement: Supplemental_Table_S3.xlsx [file Supplemental_Table_S3.xlsx]

## Sheet: Supp Table S3
Supplemental Table S3. List of all IESs with their excision group and excision score during autogamy time-courses.
ID	GROUP_NAME	FRAG (tc2)	FRAG (tc3)	FRAG (tc4)	FRAG (tc5)	32C-DEV1 (tc4)	32C-DEV1 (tc5)	32C-DEV2 (tc3)	32C-DEV2 (tc4)	64C-DEV2 (tc3)	64C-DEV2 (tc4)	64C-DEV2 (tc2)	64C-DEV3 (tc6)	64C-DEV3 (tc4)	128C-DEV3 (tc4)	128C-DEV4 (tc4)
IESPGM.PTET51.1.1.10090	Early	1	1	1	1	0.0416	0.0841000000000001	0.4393	0.7628	0.93225	0.94855	0.99285	1	1	1	1
IESPGM.PTET51.1.1.119174	Early	1	1	1	0.9924	0.1854	0.19805	0.39405	0.71195	0.77165	0.95425	0.96895	0.97525	1	1	1
IESPGM.PTET51.1.1.119417	Early	1	1	1	1	0.05565	0.217	0.3465	0.6667	0.6746	0.95735	0.9351	0.99315	1	1	1
IESPGM.PTET51.1.1.124307	Early	1	1	1	1	0.05785	0.1784	0.32045	0.60455	0.79	0.9375	0.99365	1	0.99325	1	0.9954
IESPGM.PTET51.1.1.124760	Early	1	1	1	1	0.15475	0.35415	0.7461	0.777	0.94455	0.9875	0.9565	1	1	1	1
IESPGM.PTET51.1.1.126537	Early	1	1	0.97565	1	0.1154	0.2404	0.73665	0.83315	0.9636	0.9735	0.99105	0.96645	1	1	1
IESPGM.PTET51.1.1.127572	Early	0.9946	1	0.99285	1	0.16935	0.33065	0.69785	0.7627	0.8686	0.94765	0.9662	1	1	1	1
IESPGM.PTET51.1.1.129963	Early	1	1	1	1	0.21075	0.2232	0.7412	0.9466	0.97515	1	1	1	1	1	1
IESPGM.PTET51.1.1.137853	Early	1	1	0.987	1	0.21285	0.11315	0.3335	0.54585	0.7812	0.95575	0.9524	0.9846	0.98495	1	1
IESPGM.PTET51.1.1.145486	Early	1	1	0.96895	1	0.1392	0.31435	0.5093	0.74395	0.9057	0.94765	1	1	0.99265	1	1
IESPGM.PTET51.1.1.146252	Early	0.9758	0.9817	0.97415	1	0.2293	0.21965	0.6114	0.66785	0.97545	1	0.9919	1	1	1	0.9916
IESPGM.PTET51.1.1.146818	Early	1	1	0.99265	1	0.1719	0.20225	0.2644	0.6022	0.8601	0.9254	0.7	1	0.99325	1	1
IESPGM.PTET51.1.1.14846	Early	1	1	0.99315	1	0.25355	0.24015	0.39845	0.41745	0.80775	0.95805	0.9412	0.9836	1	1	1
IESPGM.PTET51.1.1.148878	Early	1	1	0.9923	1	0.28945	0.13035	0.4516	0.7048	0.9468	0.95805	1	1	1	1	1
IESPGM.PTET51.1.1.152370	Early	1	1	1	1	0.15275	0.17785	0.53135	0.8113	0.8122	0.98485	1	1	0.9863	1	1
IESPGM.PTET51.1.1.152427	Early	1	0.9706	1	1	0.0792999999999999	0.15135	0.48155	0.67135	0.87855	0.95425	0.95335	1	1	1	1
IESPGM.PTET51.1.1.152656	Early	1	1	1	1	0.24525	0.1897	0.45225	0.6875	0.76525	0.9718	1	1	1	1	1
IESPGM.PTET51.1.1.160338	Early	1	1	1	1	0.184	0.24755	0.3768	0.6308	0.8268	0.9724	0.99375	0.9934	1	1	1
IESPGM.PTET51.1.1.169642	Early	1	1	1	1	0.18335	0.12395	0.30835	0.6457	0.9044	0.97315	0.97415	0.9859	0.9946	1	1
IESPGM.PTET51.1.1.171905	Early	0.97965	1	0.9918	1	0.1386	0.19	0.71335	0.8912	0.97675	0.96245	1	1	1	0.9804	1
IESPGM.PTET51.1.1.174130	Early	1	0.9935	0.9873	1	0.26	0.216	0.3297	0.66675	0.9297	0.9841	1	0.9833	1	1	1
IESPGM.PTET51.1.1.174469	Early	1	1	1	1	0.2005	0.2099	0.649	0.84585	0.95115	1	1	0.9841	1	1	1
IESPGM.PTET51.1.1.176766	Early	1	1	1	1	0.1147	0.235	0.4672	0.7709	0.95145	1	0.9942	1	1	1	1
IESPGM.PTET51.1.1.182206	Early	1	1	0.98915	1	0.20825	0.2018	0.66885	0.86895	0.9252	0.99295	1	1	1	1	1
IESPGM.PTET51.1.1.182353	Early	1	1	1	1	0.17995	0.25035	0.6438	0.7434	0.9923	0.97565	1	1	0.9898	1	1
IESPGM.PTET51.1.1.185409	Early	0.99545	1	1	1	0.3303	0.3893	0.5644	0.85755	0.9434	0.97815	1	1	0.9892	1	1
IESPGM.PTET51.1.1.186818	Early	1	1	0.98925	1	0.2607	0.33345	0.57365	0.8957	0.9732	1	1	1	1	1	0.99555
IESPGM.PTET51.1.1.189959	Early	0.9891	1	1	1	0.1985	0.24245	0.2669	0.7414	0.8073	0.9298	0.98025	0.9934	1	1	0.9954
IESPGM.PTET51.1.1.190052	Early	1	1	1	1	0.21635	0.41515	0.5863	0.83845	0.9472	1	1	1	1	1	1
IESPGM.PTET51.1.1.190449	Early	1	1	1	0.9884	0.06315	0.2086	0.53515	0.72165	0.8581	0.97755	0.85355	0.9935	1	1	1
IESPGM.PTET51.1.1.191018	Early	1	1	0.9846	1	0.1941	0.23635	0.51505	0.7634	0.8028	0.9612	1	1	1	1	1
IESPGM.PTET51.1.1.191133	Early	1	1	0.9945	1	0.1771	0.2041	0.6066	0.711	0.98215	0.9802	0.9716	1	1	1	0.99555
IESPGM.PTET51.1.1.191860	Early	0.9667	1	1	0.99315	0.10255	0.2669	0.3247	0.55435	0.8236	0.918	0.93725	1	0.9807	1	0.9836
IESPGM.PTET51.1.1.193032	Early	1	1	0.9846	1	0.1569	0.2116	0.48985	0.754	0.8963	0.91445	1	1	1	1	1
IESPGM.PTET51.1.1.194731	Early	0.9956	1	0.9827	1	0.20825	0.2834	0.5272	0.72225	0.84805	0.9759	0.97825	1	1	1	0.98245
IESPGM.PTET51.1.1.194985	Early	1	1	0.99335	1	0.251	0.22165	0.58145	0.75975	0.93395	0.95835	0.955	0.9877	1	1	1
IESPGM.PTET51.1.1.196915	Early	1	1	1	1	0.11435	0.25255	0.48785	0.71265	0.8545	0.9737	0.96025	1	0.99265	1	1
IESPGM.PTET51.1.1.198130	Early	1	1	0.9942	1	0.12765	0.2381	0.422	0.78015	0.9532	1	1	1	1	1	1
IESPGM.PTET51.1.1.198437	Early	0.98795	1	1	0.99155	0.0226	0.25795	0.65795	0.8345	0.994	1	1	0.9853	1	1	1
IESPGM.PTET51.1.1.199132	Early	1	1	0.9735	1	0.22515	0.3261	0.6675	0.8805	0.9712	0.99155	0.8904	1	1	1	1
IESPGM.PTET51.1.1.200712	Early	0.99595	1	1	1	0.2364	0.23865	0.40035	0.7768	0.93925	0.9761	1	1	1	1	0.9955
IESPGM.PTET51.1.1.201462	Early	1	1	0.9798	0.9901	0.13445	0.1377	0.407	0.63365	0.94365	0.9583	0.95845	0.9762	0.99365	1	1
IESPGM.PTET51.1.1.206309	Early	1	0.98075	1	1	0.0734	0.1985	0.3713	0.66195	0.8415	0.9808	1	1	1	1	1
IESPGM.PTET51.1.1.207302	Early	1	1	1	0.9881	0.2959	0.23165	0.29025	0.7201	0.9273	0.9583	1	0.99325	1	1	0.995
IESPGM.PTET51.1.1.209809	Early	1	1	1	1	0.19835	0.1551	0.5153	0.52035	0.7174	0.9233	1	1	1	1	1
IESPGM.PTET51.1.1.210544	Early	1	1	1	1	0.12	0.37095	0.4948	0.69465	0.87505	0.9504	1	1	1	1	1
IESPGM.PTET51.1.1.210955	Early	1	1	1	1	0.2915	0.3538	0.63915	0.752	0.88035	0.99425	0.9494	1	1	1	1
IESPGM.PTET51.1.1.211017	Early	1	1	1	1	0.1964	0.2902	0.5479	0.8226	0.96265	1	1	1	1	1	1
IESPGM.PTET51.1.1.211306	Early	1	1	0.9697	1	0.14925	0.2108	0.34645	0.7463	0.8758	0.96405	1	0.99275	1	1	1
IESPGM.PTET51.1.1.212111	Early	1	1	1	0.99275	0.0632	0.17305	0.425	0.5202	0.86145	0.8986	0.9663	0.99255	1	1	0.98805
IESPGM.PTET51.1.1.212886	Early	1	1	1	1	0.23335	0.161	0.5026	0.7329	0.8725	1	0.9796	1	1	1	1
IESPGM.PTET51.1.1.212962	Early	1	1	0.9853	1	0.1748	0.33395	0.4307	0.6702	0.887	0.99335	1	1	1	1	1
IESPGM.PTET51.1.1.213897	Early	1	1	1	0.9945	0.1888	0.16995	0.49635	0.56515	0.80895	0.95585	0.9127	0.99365	1	1	1
IESPGM.PTET51.1.1.214549	Early	1	1	0.9851	1	0.14675	0.12325	0.5493	0.7568	0.964	0.9749	1	1	1	1	1
IESPGM.PTET51.1.1.218007	Early	1	1	1	0.9733	0.0186999999999999	0.2191	0.6578	0.95455	0.95205	0.99105	1	0.9815	0.9859	1	0.99505
IESPGM.PTET51.1.1.219293	Early	1	1	1	1	0.16435	0.149	0.3035	0.4737	0.88005	0.96925	0.94855	0.9904	1	1	1
IESPGM.PTET51.1.1.220096	Early	1	1	0.9914	0.9877	0.14965	0.15715	0.49595	0.64375	0.9138	0.94935	0.98665	0.9776	1	1	1
IESPGM.PTET51.1.1.222344	Early	1	1	1	1	0.1334	0.3536	0.5481	0.52645	0.856	0.95425	0.96665	0.99275	1	1	0.991
IESPGM.PTET51.1.1.225714	Early	1	1	0.9697	0.9852	0.0944499999999999	0.18125	0.4058	0.47615	0.7662	0.8663	0.9131	0.9774	1	1	1
IESPGM.PTET51.1.1.231327	Early	1	1	1	1	0.0715	0.16115	0.4162	0.8363	0.9274	1	1	1	1	1	1
IESPGM.PTET51.1.1.240348	Early	1	1	0.9783	0.9924	0.1978	0.1921	0.51665	0.71785	0.9884	0.9483	1	1	0.9836	0.9841	1
IESPGM.PTET51.1.1.241226	Early	1	1	0.9626	1	0.05585	0.2301	0.438	0.65045	0.7728	0.9711	0.93375	1	1	1	0.99475
IESPGM.PTET51.1.1.244038	Early	1	0.9116	0.974	1	0.19695	0.2202	0.5748	0.78585	0.78535	0.9867	1	0.99375	0.99	1	0.9962
IESPGM.PTET51.1.1.252531	Early	1	1	1	1	0.1802	0.11025	0.41005	0.7027	0.93215	0.99055	1	1	1	1	1
IESPGM.PTET51.1.1.252812	Early	1	1	1	1	0.14475	0.28855	0.67705	0.7208	0.92875	0.9839	0.98385	1	1	1	0.9884
IESPGM.PTET51.1.1.265218	Early	1	0.9677	1	1	0.16265	0.3571	0.64355	0.758	0.95015	0.9804	0.994	0.9767	1	1	1
IESPGM.PTET51.1.1.267339	Early	1	1	0.9947	1	0.23675	0.18015	0.5092	0.77735	0.84395	0.96005	0.97965	1	1	1	1
IESPGM.PTET51.1.1.268406	Early	1	1	1	1	0.17085	0.37865	0.62855	0.82645	0.88275	1	1	1	0.9867	1	1
IESPGM.PTET51.1.1.271581	Early	1	1	0.99285	0.99195	0.17935	0.24305	0.66785	0.95105	0.98485	1	1	1	1	1	1
IESPGM.PTET51.1.1.276574	Early	1	1	0.99205	1	0.1334	0.2797	0.51085	0.72795	0.8891	0.9872	0.93135	1	1	1	1
IESPGM.PTET51.1.1.282638	Early	1	1	0.97715	0.987	0.2273	0.33655	0.5673	0.68065	0.9179	0.9357	0.90915	0.96185	1	1	1
IESPGM.PTET51.1.1.284619	Early	1	1	1	1	0.0457	0.1763	0.4406	0.78805	0.7616	0.95675	0.98365	0.9844	1	1	1
IESPGM.PTET51.1.1.285091	Early	1	1	1	1	0.2005	0.37515	0.5716	0.8448	0.9366	0.9735	1	1	1	1	1
IESPGM.PTET51.1.1.28554	Early	1	1	0.9828	1	0.24105	0.2435	0.36315	0.6437	0.79005	0.905	0.90205	0.9818	1	0.975	1
IESPGM.PTET51.1.1.28565	Early	1	1	1	1	0.1972	0.3693	0.4847	0.7477	0.8958	0.9	0.8959	0.9685	1	1	1
IESPGM.PTET51.1.1.291953	Early	1	1	0.9853	0.99295	0.22475	0.34455	0.72045	0.83635	0.9516	0.9918	1	1	1	0.9923	1
IESPGM.PTET51.1.1.292806	Early	1	1	0.99365	1	0.2024	0.2887	0.65715	0.8725	0.95895	1	1	1	1	1	1
IESPGM.PTET51.1.1.297662	Early	1	0.99285	0.9867	0.99485	0.1379	0.255	0.716	0.879	0.9879	0.99055	1	1	1	1	1
IESPGM.PTET51.1.1.302041	Early	1	1	0.99385	1	0.1347	0.21765	0.77135	0.9394	0.98795	0.99195	1	1	1	1	1
IESPGM.PTET51.1.1.313219	Early	1	1	1	1	0.1489	0.10765	0.28525	0.63785	0.8248	0.9859	0.93725	0.9934	1	1	1
IESPGM.PTET51.1.1.320884	Early	1	1	0.9859	0.99205	0.0400499999999999	0.1423	0.5249	0.6013	0.81015	1	1	0.9808	1	1	1
IESPGM.PTET51.1.1.32205	Early	1	1	0.97565	0.98305	0.17245	0.1437	0.3632	0.63495	0.78305	0.9422	0.9692	1	0.99205	1	1
IESPGM.PTET51.1.1.322121	Early	1	1	1	0.9946	0.13285	0.1802	0.546	0.7492	0.8546	0.93465	0.96835	0.99205	0.9747	0.98275	1
IESPGM.PTET51.1.1.324660	Early	1	1	1	1	0.24765	0.35135	0.5065	0.8061	0.80765	0.97965	0.9878	1	0.9895	1	1
IESPGM.PTET51.1.1.326391	Early	1	1	0.98115	1	0.2419	0.39695	0.70205	0.7479	0.9136	0.9934	1	1	0.994	1	1
IESPGM.PTET51.1.1.330329	Early	1	1	0.994	1	0.1781	0.12275	0.33405	0.62285	0.86215	0.9357	0.99205	0.9873	0.99295	1	1
IESPGM.PTET51.1.1.331042	Early	1	1	1	0.9867	0.0381	0.26225	0.4268	0.52645	0.7368	0.86005	0.9128	0.9716	0.9151	0.96235	0.98705
IESPGM.PTET51.1.1.331616	Early	1	1	0.9944	1	0.075	0.39685	0.745	0.9083	0.96875	0.99285	1	0.9857	1	1	0.9957
IESPGM.PTET51.1.1.332671	Early	1	1	0.98075	1	0.15405	0.1623	0.3716	0.7582	0.9861	0.9802	0.98415	0.99155	1	1	1
IESPGM.PTET51.1.1.33321	Early	1	1	1	0.99315	0.18735	0.20635	0.6082	0.78775	0.7891	0.9799	0.98245	1	1	1	1
IESPGM.PTET51.1.1.333559	Early	0.9945	1	0.994	0.99275	0.1681	0.1375	0.5854	0.89575	1	1	1	1	1	1	1
IESPGM.PTET51.1.1.335300	Early	1	1	0.9935	1	0.1803	0.21055	0.4169	0.6386	0.7533	0.9633	0.98125	1	0.9861	0.9904	0.9944
IESPGM.PTET51.1.1.342262	Early	1	0.98125	0.99365	1	0.2013	0.1534	0.4356	0.5942	0.57805	0.8892	0.9661	0.9787	0.9885	1	1
IESPGM.PTET51.1.1.34420	Early	1	1	0.99275	1	0.0912500000000001	0.34105	0.68965	0.92455	0.9832	1	1	0.99295	1	1	1
IESPGM.PTET51.1.1.351071	Early	1	1	0.9942	1	0.1242	0.26175	0.44735	0.6569	0.8571	0.9768	1	0.99205	1	1	0.9962
IESPGM.PTET51.1.1.354879	Early	1	1	0.99285	0.994	0.1456	0.20185	0.4775	0.72225	0.8356	0.91825	0.92955	0.9909	1	1	1
IESPGM.PTET51.1.1.357229	Early	0.97755	1	0.9673	0.9706	0.1461	0.17615	0.375	0.697	0.83535	0.9735	0.95245	0.96225	0.9802	0.9643	1
IESPGM.PTET51.1.1.36075	Early	1	1	1	1	0.208	0.185	0.52155	0.64485	0.8571	0.99155	1	0.9859	1	1	1
IESPGM.PTET51.1.1.367043	Early	0.9892	0.99275	0.9859	1	0.3186	0.27525	0.6148	0.877	0.89925	0.9878	1	1	0.9943	1	1
IESPGM.PTET51.1.1.367757	Early	0.9875	1	1	1	0.3262	0.3962	0.5771	0.8518	0.9872	1	1	0.9868	1	1	1
IESPGM.PTET51.1.1.371297	Early	1	1	1	1	0.2305	0.3354	0.7103	0.74345	0.8672	0.9643	1	0.9889	0.9863	1	1
IESPGM.PTET51.1.1.374190	Early	1	1	1	1	0.12435	0.21055	0.6044	0.7569	0.90115	0.97565	0.9294	1	0.9885	1	0.99475
IESPGM.PTET51.1.1.376912	Early	1	1	1	1	0.1351	0.1626	0.5064	0.51475	0.87765	0.94315	0.9699	1	0.9886	1	0.9959
IESPGM.PTET51.1.1.380018	Early	1	1	0.99325	1	0.06555	0.20005	0.68	0.84865	0.9283	1	0.9621	1	1	1	0.99575
IESPGM.PTET51.1.1.382657	Early	0.995	0.9788	0.9805	1	0.1121	0.15535	0.35255	0.60045	0.7216	0.89065	0.93405	0.9804	0.9878	1	1
IESPGM.PTET51.1.1.388324	Early	1	1	0.9851	1	0.17745	0.2689	0.49235	0.7903	0.9843	0.97965	1	1	1	1	1
IESPGM.PTET51.1.1.388779	Early	1	1	1	1	0.13655	0.13925	0.3251	0.5908	0.88805	0.9384	1	1	0.9863	0.99105	1
IESPGM.PTET51.1.1.395380	Early	1	1	0.99475	1	0.12805	0.14895	0.33495	0.7038	0.81135	0.9262	0.8784	0.9945	0.99205	1	1
IESPGM.PTET51.1.1.395961	Early	1	1	0.9934	1	0.176	0.1552	0.4976	0.78515	0.96085	0.9589	1	1	1	1	1
IESPGM.PTET51.1.1.402304	Early	1	1	1	1	0.046	0.1184	0.78165	0.85345	1	0.99055	0.9846	1	1	1	1
IESPGM.PTET51.1.1.405497	Early	1	1	1	1	0.04365	0.3538	0.5907	0.89315	0.9806	1	1	1	1	1	0.99525
IESPGM.PTET51.1.1.407196	Early	1	1	1	0.9942	0.10525	0.14195	0.3266	0.6827	0.74845	0.97785	0.98835	0.9859	1	1	1
IESPGM.PTET51.1.1.422136	Early	0.9873	1	0.9865	1	0.0996999999999999	0.14155	0.3628	0.64815	0.82615	0.9914	0.9293	0.9821	1	1	1
IESPGM.PTET51.1.1.423782	Early	1	1	0.9935	1	0.1111	0.1876	0.40045	0.5289	0.864	0.93435	0.97725	0.9922	1	1	1
IESPGM.PTET51.1.1.425622	Early	1	1	0.9923	1	0.11895	0.1957	0.3462	0.6734	0.66185	0.8923	0.9527	0.9881	1	1	1
IESPGM.PTET51.1.1.437409	Early	1	0.98415	1	0.9684	0.13495	0.2443	0.5072	0.543	0.8515	0.8955	0.9861	0.9647	0.97355	0.9818	0.9914
IESPGM.PTET51.1.1.442173	Early	1	1	1	1	0.1154	0.18415	0.5201	0.8745	0.982	0.98765	1	1	1	1	1
IESPGM.PTET51.1.1.446239	Early	1	1	1	1	0.099	0.2819	0.5421	0.66175	0.9153	0.9759	0.95565	1	1	1	1
IESPGM.PTET51.1.1.447946	Early	1	1	0.9875	0.99325	0.18875	0.0722499999999999	0.2843	0.6619	0.7453	0.9406	0.97405	1	0.98835	0.9904	1
IESPGM.PTET51.1.1.454489	Early	1	1	0.99325	1	0.165	0.3375	0.55345	0.6459	0.898	0.9863	1	0.99155	1	1	1
IESPGM.PTET51.1.1.459435	Early	1	1	0.99255	1	0.17635	0.30645	0.6395	0.7137	0.8855	0.97845	0.9526	0.99125	0.98075	0.99205	1
IESPGM.PTET51.1.1.465645	Early	1	0.99105	0.99315	0.99295	0.13085	0.18645	0.2976	0.6739	0.8886	0.92585	0.9685	1	0.9836	1	1
IESPGM.PTET51.1.1.46903	Early	1	1	1	1	0.1584	0.1496	0.581	0.74595	0.9891	0.9857	1	1	1	1	1
IESPGM.PTET51.1.1.470922	Early	1	1	0.98415	1	0.37065	0.3005	0.5731	0.61245	0.7683	0.8978	0.8203	1	1	1	1
IESPGM.PTET51.1.1.480411	Early	1	1	0.99375	1	0	0.19515	0.5663	0.68355	0.6832	0.918	0.98075	0.99335	0.9896	1	1
IESPGM.PTET51.1.1.480912	Early	1	1	1	0.9897	0.16515	0.20145	0.54275	0.6716	0.7381	0.9545	0.9197	0.9914	1	1	0.99545
IESPGM.PTET51.1.1.483804	Early	1	1	1	1	0.21015	0.2934	0.7078	0.8649	0.9811	0.99255	1	1	1	1	1
IESPGM.PTET51.1.1.490934	Early	1	1	0.97315	1	0.07165	0.1251	0.37645	0.64235	0.76415	0.9867	1	0.9914	1	0.9804	1
IESPGM.PTET51.1.1.505333	Early	1	1	1	0.99285	0.23045	0.3141	0.64105	0.8456	0.92015	0.9914	1	1	1	1	1
IESPGM.PTET51.1.1.505652	Early	1	1	1	1	0.20485	0.29285	0.6646	0.85865	0.92665	0.99275	0.97295	0.9865	1	1	1
IESPGM.PTET51.1.1.506446	Early	1	1	1	1	0.199	0.2343	0.65805	0.86665	0.9299	1	1	0.9844	1	1	1
IESPGM.PTET51.1.1.516850	Early	1	1	0.96695	1	0	0.0669500000000001	0.33105	0.61965	0.85235	0.98115	1	1	1	1	1
IESPGM.PTET51.1.1.517743	Early	1	1	1	1	0.15	0.18215	0.345	0.50455	0.84325	0.86235	0.73055	0.97565	1	1	1
IESPGM.PTET51.1.1.518443	Early	1	1	0.9878	1	0.20785	0.16825	0.47835	0.76115	0.8453	0.9444	0.97275	1	1	1	1
IESPGM.PTET51.1.1.525731	Early	0.994	1	0.9942	1	0.2766	0.2443	0.67025	0.86335	0.9536	0.9821	0.9863	1	1	1	1
IESPGM.PTET51.1.1.526508	Early	1	0.9896	1	1	0.1207	0.16335	0.66715	0.82105	0.9432	0.97815	1	1	1	1	1
IESPGM.PTET51.1.1.539335	Early	1	1	0.99205	1	0.24635	0.1143	0.41845	0.3887	0.87635	0.92085	0.9607	0.99445	1	1	1
IESPGM.PTET51.1.1.540675	Early	1	0.9597	1	0.9846	0.19615	0.25115	0.5878	0.6596	0.8703	0.9643	0.9747	0.9716	0.99105	0.97205	0.9911
IESPGM.PTET51.1.1.544024	Early	1	1	0.95875	0.9894	0.1183	0.2071	0.28395	0.52555	0.814	0.9206	0.9169	0.99195	0.989	1	1
IESPGM.PTET51.1.1.552305	Early	1	0.9875	1	0.98915	0.1211	0.3033	0.7899	0.8977	0.9934	1	1	0.9825	1	1	1
IESPGM.PTET51.1.1.567460	Early	1	1	1	1	0.0801000000000001	0.17545	0.5098	0.68195	0.8416	0.9144	1	1	1	1	0.99455
IESPGM.PTET51.1.1.568488	Early	1	1	1	1	0.13645	0.16375	0.45985	0.6907	0.9349	0.9762	1	0.9855	1	1	1
IESPGM.PTET51.1.1.572580	Early	1	1	1	1	0.1402	0.2024	0.25545	0.63135	0.86	0.9534	0.93075	1	1	1	1
IESPGM.PTET51.1.1.583781	Early	1	1	0.9941	1	0.18565	0.2962	0.63	0.81575	0.8222	0.9857	0.99195	0.99195	1	1	1
IESPGM.PTET51.1.1.593194	Early	1	1	1	0.9935	0.0899	0.06525	0.1951	0.66785	0.8961	0.9593	0.98665	0.9848	1	1	1
IESPGM.PTET51.1.1.607639	Early	1	1	1	1	0.22735	0.34115	0.7498	0.7248	0.91975	0.99455	0.99305	1	0.9943	1	1
IESPGM.PTET51.1.1.608109	Early	1	1	0.9875	0.98925	0.15805	0.1939	0.41235	0.7104	0.7853	0.96945	1	0.99255	1	0.99	1
IESPGM.PTET51.1.1.612908	Early	0.97745	1	0.9914	0.99155	0.13835	0.1099	0.35815	0.5334	0.81225	0.87425	0.76295	0.97205	0.99195	1	0.9956
IESPGM.PTET51.1.1.615727	Early	1	1	1	1	0.0648	0.16805	0.57505	0.63	0.8649	0.92515	0.98115	0.97815	0.97875	0.99255	0.9898
IESPGM.PTET51.1.1.625438	Early	1	1	1	0.9877	0.209	0.25745	0.5336	0.6294	0.8427	0.9617	0.9405	1	0.99255	1	1
IESPGM.PTET51.1.1.626011	Early	1	1	0.9867	1	0.25265	0.26695	0.604	0.84545	0.94265	1	1	1	1	0.9914	1
IESPGM.PTET51.1.1.627880	Early	1	1	0.99385	0.98655	0.12115	0.172	0.4453	0.7125	0.7921	0.9612	0.98495	0.9947	1	1	1
IESPGM.PTET51.1.1.63155	Early	1	1	0.9747	0.989	0.08905	0.16465	0.204	0.58035	0.799	0.91505	0.94555	0.9889	0.9859	0.98385	1
IESPGM.PTET51.1.1.641643	Early	1	1	0.99335	0.99505	0.05785	0.25275	0.40045	0.7589	0.93775	1	1	0.9878	1	1	1
IESPGM.PTET51.1.1.64750	Early	1	1	1	0.99295	0.1761	0.23905	0.6129	0.83525	0.96115	0.9902	1	0.98935	1	1	1
IESPGM.PTET51.1.1.647565	Early	0.9888	1	1	1	0.2175	0.1892	0.59665	0.75295	0.7692	0.98215	1	1	0.9923	1	1
IESPGM.PTET51.1.1.647630	Early	1	1	0.99315	0.9865	0.2763	0.1786	0.35615	0.69715	0.7073	0.9256	0.8754	0.98685	1	1	1
IESPGM.PTET51.1.1.650205	Early	1	1	0.99285	1	0.174	0.12325	0.16165	0.7171	0.7715	0.9334	0.8399	0.99275	1	1	1
IESPGM.PTET51.1.1.652540	Early	1	1	0.99195	1	0.09095	0.2791	0.6482	0.8546	0.97265	1	1	0.98835	1	1	1
IESPGM.PTET51.1.1.664507	Early	1	0.9961	1	1	0.19285	0.1568	0.5287	0.78445	0.94025	0.99285	0.98925	0.963	1	1	1
IESPGM.PTET51.1.1.675364	Early	0.9918	1	1	1	0.1178	0.26345	0.59895	0.9	0.9858	1	1	0.9943	1	0.99205	1
IESPGM.PTET51.1.1.676791	Early	1	1	0.9865	1	0.12385	0.218	0.5086	0.55375	0.74625	0.8977	0.8511	1	0.97785	1	1
IESPGM.PTET51.1.1.683837	Early	1	1	0.9844	1	0.12505	0.1947	0.35085	0.71135	0.86955	0.97305	1	1	1	1	1
IESPGM.PTET51.1.1.685180	Early	1	1	1	1	0.1058	0.19895	0.4662	0.77115	0.9264	1	0.9857	1	1	1	1
IESPGM.PTET51.1.1.68554	Early	1	1	1	1	0.0378000000000001	0.08465	0.3786	0.56515	0.78915	0.9699	0.9865	0.9863	1	1	1
IESPGM.PTET51.1.1.685878	Early	1	1	1	0.99375	0.0378000000000001	0.1801	0.54945	0.8238	0.8661	0.9796	0.97855	0.9924	1	1	1
IESPGM.PTET51.1.1.687249	Early	0.9947	1	1	0.97655	0.0716	0.1525	0.3892	0.6725	0.91705	0.98	0.9595	1	1	1	1
IESPGM.PTET51.1.1.68910	Early	1	1	1	0.98	0.18745	0.18335	0.4694	0.75735	0.86435	0.95905	0.99195	1	1	1	1
IESPGM.PTET51.1.1.689924	Early	1	1	0.9868	1	0.2435	0.19505	0.615	0.7502	0.9912	1	1	0.9935	0.9946	1	1
IESPGM.PTET51.1.1.703183	Early	1	1	1	1	0.14185	0.1187	0.37855	0.6377	0.701	0.9941	0.94565	1	0.99515	1	1
IESPGM.PTET51.1.1.703203	Early	1	1	1	1	0.1571	0.13855	0.43165	0.58435	0.80415	0.956	1	1	0.9956	1	1
IESPGM.PTET51.1.1.706846	Early	1	1	1	1	0.1325	0.1011	0.26985	0.47825	0.8765	0.9683	1	0.9914	1	1	0.9935
IESPGM.PTET51.1.1.70913	Early	1	1	0.97205	1	0.1502	0.13575	0.2631	0.6609	0.91915	0.92565	0.9451	0.98	1	1	1
IESPGM.PTET51.1.1.712106	Early	1	1	1	1	0.1398	0.2033	0.51195	0.64755	0.7578	0.9615	0.9579	0.9881	1	1	1
IESPGM.PTET51.1.1.720353	Early	1	1	1	1	0.2226	0.31595	0.4838	0.79285	0.82335	0.9825	1	0.9868	1	0.9831	1
IESPGM.PTET51.1.1.726943	Early	1	1	0.9863	1	0.0978	0.12985	0.5715	0.7939	0.80965	0.96	0.98495	0.98665	1	1	0.9922
IESPGM.PTET51.1.1.730347	Early	1	1	0.99335	0.99535	0.07605	0.1619	0.3504	0.7768	0.92085	0.906	0.98665	0.9831	1	1	0.99485
IESPGM.PTET51.1.1.746967	Early	1	1	0.9935	1	0.0793999999999999	0.10485	0.4506	0.52905	0.86575	0.9501	0.9091	0.98485	0.9935	1	1
IESPGM.PTET51.1.1.751254	Early	1	1	0.96875	1	0.0448	0.2986	0.4182	0.75295	0.93405	0.9853	0.99155	1	1	1	1
IESPGM.PTET51.1.1.75259	Early	1	1	1	1	0.1856	0.25015	0.6617	0.80355	0.9157	0.9285	0.9796	0.9878	1	1	1
IESPGM.PTET51.1.1.755353	Early	1	1	1	1	0.2665	0.2687	0.64015	0.7536	0.97	0.9918	1	1	1	1	1
IESPGM.PTET51.1.1.768742	Early	1	1	1	0.987	0.11675	0.36895	0.67695	0.88145	0.87685	0.9685	0.9951	0.9896	1	0.9914	1
IESPGM.PTET51.1.1.770280	Early	1	1	1	0.99285	0.0670500000000001	0.14865	0.42565	0.60355	0.7704	0.9804	0.9634	0.9904	0.9922	1	1
IESPGM.PTET51.1.1.772229	Early	1	1	1	1	0.0488	0.3605	0.60335	0.76525	0.95525	0.97845	0.9649	0.99205	1	1	1
IESPGM.PTET51.1.1.778613	Early	1	1	0.99335	1	0.1575	0.17335	0.32535	0.715	0.7029	0.94755	1	0.97645	1	1	0.9954
IESPGM.PTET51.1.1.785733	Early	1	1	1	1	0.35005	0.37025	0.65765	0.76695	0.9093	0.9173	1	0.988	1	0.9649	0.99575
IESPGM.PTET51.1.1.792742	Early	1	1	0.9851	1	0.15805	0.1543	0.6698	0.83005	0.9358	1	0.9836	1	0.9897	0.98865	1
IESPGM.PTET51.1.1.8259	Early	1	1	1	1	0.1009	0.12165	0.28575	0.6343	0.67015	0.9023	0.95655	1	0.9683	1	1
IESPGM.PTET51.1.1.826277	Early	1	1	1	1	0.24	0.2392	0.4711	0.5867	0.9187	1	0.9694	1	1	1	1
IESPGM.PTET51.1.1.83020	Early	1	1	1	1	0.1212	0.3001	0.7881	0.9074	1	1	1	1	0.99385	0.9818	1
IESPGM.PTET51.1.1.83370	Early	1	1	0.99325	1	0.189	0.2227	0.21685	0.49855	0.83025	0.92145	0.99365	1	1	1	1
IESPGM.PTET51.1.1.840112	Early	1	1	1	0.9923	0.15115	0.1588	0.62165	0.8305	0.9904	1	0.99155	0.9787	1	1	0.9914
IESPGM.PTET51.1.1.848704	Early	1	1	1	1	0.3095	0.1769	0.57165	0.6155	0.84	0.9294	0.9861	1	0.9825	1	1
IESPGM.PTET51.1.1.859009	Early	1	1	1	1	0.1531	0.18655	0.5641	0.82625	0.9295	0.9914	1	1	1	1	1
IESPGM.PTET51.1.1.861277	Early	1	1	0.99	1	0.14055	0.2296	0.77155	0.8305	0.9133	0.9452	0.9806	1	1	1	1
IESPGM.PTET51.1.1.863110	Early	1	1	1	1	0.0794	0.22645	0.7121	0.87985	0.9265	0.9708	0.9943	1	1	1	1
IESPGM.PTET51.1.1.866450	Early	1	1	0.9902	1	0.08525	0.32645	0.6923	0.75715	0.91755	0.9422	0.97785	0.98935	1	1	1
IESPGM.PTET51.1.1.87082	Early	1	1	0.988	1	0.17735	0.309	0.7312	0.79725	0.9789	0.9863	1	1	1	1	1
IESPGM.PTET51.1.1.878880	Early	1	1	1	1	0.1396	0.3637	0.7146	0.8249	1	1	1	0.9924	1	1	1
IESPGM.PTET51.1.1.880851	Early	1	1	0.99125	1	0.08295	0.0871499999999999	0.40065	0.63045	0.81835	0.9492	1	0.9914	1	1	1
IESPGM.PTET51.1.1.911396	Early	1	1	1	1	0.0442	0.2971	0.619	0.8269	0.9775	1	1	1	1	0.9831	1
IESPGM.PTET51.1.1.933079	Early	1	1	0.9875	1	0.1761	0.1809	0.45175	0.66405	0.72925	0.95675	0.99385	0.95805	1	1	1
IESPGM.PTET51.1.1.949172	Early	1	0.93435	0.9945	1	0.20445	0.1616	0.49285	0.5542	0.8507	0.8571	0.9785	0.9857	1	1	1
IESPGM.PTET51.1.1.959164	Early	1	1	1	0.9902	0.2771	0.3821	0.7095	0.6973	0.9805	0.9722	0.97975	1	0.97205	0.9863	0.9796
IESPGM.PTET51.1.1.99900	Early	1	1	0.9875	1	0.0932500000000001	0.205	0.5064	0.8077	0.9502	0.9655	1	1	1	1	0.9955
IESPGM.PTET51.1.10.100534	Early	1	1	1	0.99255	0.13025	0.2062	0.47805	0.774	0.8734	0.9672	0.96485	0.9896	1	1	1
IESPGM.PTET51.1.10.105477	Early	1	1	1	1	0.16695	0.11785	0.2862	0.65805	0.8205	0.9645	1	0.99265	1	1	1
IESPGM.PTET51.1.10.105851	Early	1	1	1	1	0.33975	0.3441	0.61415	0.82115	0.92455	0.97715	0.98195	0.9844	0.99335	1	0.995
IESPGM.PTET51.1.10.107637	Early	1	1	1	1	0.14145	0.1965	0.45405	0.7477	0.7694	0.96005	0.9298	1	1	1	1
IESPGM.PTET51.1.10.108951	Early	1	1	1	1	0.14425	0.0834	0.22155	0.5986	0.71765	0.9564	1	1	1	1	0.9944
IESPGM.PTET51.1.10.110955	Early	1	1	0.99275	1	0.0211	0.22645	0.68525	0.8474	0.9333	1	1	1	1	1	1
IESPGM.PTET51.1.10.119256	Early	1	0.9878	0.9836	1	0.0597	0.12505	0.4175	0.6316	0.73645	0.9242	0.8867	0.9649	0.9878	1	1
IESPGM.PTET51.1.10.122664	Early	1	1	0.9857	1	0.15425	0.2198	0.46835	0.6387	0.6801	0.95015	0.91145	0.99315	1	1	1
IESPGM.PTET51.1.10.126655	Early	1	1	1	0.99475	0.11015	0.2857	0.64405	0.84635	0.95045	0.9851	1	1	1	1	1
IESPGM.PTET51.1.10.133730	Early	1	0.9956	0.9947	1	0.1154	0.1654	0.475	0.6125	0.78815	0.88085	0.94945	1	0.9839	1	1
IESPGM.PTET51.1.10.134075	Early	1	0.99545	0.9853	1	0.1429	0.15945	0.344	0.52345	0.76525	0.9474	0.9603	1	0.99155	1	1
IESPGM.PTET51.1.10.134316	Early	1	1	0.9865	1	0.2733	0.21955	0.5223	0.76195	0.9403	0.92105	0.9396	0.97515	1	1	1
IESPGM.PTET51.1.10.135281	Early	1	1	1	1	0.14425	0.19115	0.42515	0.72165	0.8591	1	1	1	1	1	1
IESPGM.PTET51.1.10.139366	Early	1	1	1	1	0.2224	0.37665	0.58115	0.8058	0.92945	0.9829	0.9661	0.9941	1	1	1
IESPGM.PTET51.1.10.140602	Early	1	0.981	0.9888	0.964	0.20515	0.2752	0.5087	0.5497	0.81275	0.84865	0.9659	0.99295	1	0.9851	1
IESPGM.PTET51.1.10.141041	Early	1	1	1	1	0.02085	0.0800000000000001	0.4064	0.68285	0.83995	0.9541	1	1	0.98185	1	1
IESPGM.PTET51.1.10.15488	Early	1	0.99535	1	1	0.2937	0.3885	0.60405	0.78525	0.9546	0.99295	1	0.96695	1	0.9914	1
IESPGM.PTET51.1.10.158963	Early	1	1	0.98335	1	0.0459000000000001	0.2189	0.42605	0.7509	0.9057	0.99375	0.98215	0.99125	0.99265	1	0.987
IESPGM.PTET51.1.10.159772	Early	0.9894	1	0.98115	1	0.2001	0.1228	0.2652	0.5685	0.8197	0.8814	0.87065	0.9175	1	1	0.9939
IESPGM.PTET51.1.10.160327	Early	1	1	0.9839	1	0.1047	0.1069	0.50805	0.5644	0.79685	0.9123	0.7351	0.9836	0.99335	1	1
IESPGM.PTET51.1.10.161284	Early	0.99165	1	1	1	0.1	0.26765	0.62135	0.73955	0.81705	0.97315	0.8809	0.98275	1	0.99155	1
IESPGM.PTET51.1.10.161471	Early	1	1	1	1	0.1607	0.2264	0.3324	0.78375	0.94585	0.99375	1	0.99275	1	1	1
IESPGM.PTET51.1.10.163242	Early	1	1	1	0.98735	0.06455	0.20145	0.432	0.8265	0.912	0.9934	1	1	0.99315	0.99105	1
IESPGM.PTET51.1.10.165666	Early	1	1	1	1	0.16415	0.2128	0.4192	0.54165	0.75155	0.89085	0.82065	0.9682	0.96555	0.9844	1
IESPGM.PTET51.1.10.16567	Early	1	1	1	1	0.0650999999999999	0.08815	0.38075	0.73045	0.8978	0.9855	0.97305	1	1	1	0.9873
IESPGM.PTET51.1.10.165970	Early	1	1	1	1	0.18715	0.2527	0.32935	0.78095	0.8907	0.9328	0.91485	1	1	1	0.9942
IESPGM.PTET51.1.10.167743	Early	1	0.9909	0.9868	1	0.13605	0.2469	0.5589	0.8202	0.87395	0.9846	0.9754	0.987	1	1	1
IESPGM.PTET51.1.10.183118	Early	1	1	1	0.99505	0.0958	0.14055	0.26965	0.58125	0.7553	0.91755	0.9334	1	0.99325	1	0.9952
IESPGM.PTET51.1.10.19992	Early	1	1	1	1	0.11435	0.20835	0.4416	0.6954	0.90435	0.97305	0.99265	1	1	1	1
IESPGM.PTET51.1.10.204953	Early	1	1	1	1	0.17865	0.1187	0.3614	0.58495	0.7595	0.93665	0.9297	0.99305	1	0.99295	1
IESPGM.PTET51.1.10.205301	Early	1	1	1	1	0.30565	0.32825	0.5948	0.87855	0.94495	0.95335	0.9818	0.9792	1	0.9889	1
IESPGM.PTET51.1.10.207669	Early	1	1	1	0.99315	0.1273	0.16325	0.3799	0.58765	0.7594	0.94635	0.97725	1	0.99295	1	1
IESPGM.PTET51.1.10.211233	Early	1	1	1	1	0.1555	0.2299	0.6775	0.8483	1	1	1	1	1	0.9875	0.9945
IESPGM.PTET51.1.10.217163	Early	1	1	1	0.97845	0	0.15565	0.36445	0.59055	0.8001	0.9336	0.9468	1	1	1	1
IESPGM.PTET51.1.10.218516	Early	1	1	0.9942	0.99445	0.2574	0.25575	0.66785	0.82625	0.9545	0.9365	0.99325	0.99315	1	1	1
IESPGM.PTET51.1.10.219209	Early	1	1	1	1	0.07165	0.1247	0.3337	0.5	0.84265	0.9461	0.94665	1	1	1	1
IESPGM.PTET51.1.10.219318	Early	1	0.99255	1	1	0.1166	0.1707	0.61075	0.78055	0.95435	0.97155	1	1	1	1	1
IESPGM.PTET51.1.10.221520	Early	1	1	0.96545	1	0.0702	0.14085	0.33585	0.5926	0.85785	0.93915	0.9048	0.9855	1	1	0.99595
IESPGM.PTET51.1.10.22236	Early	1	1	0.9825	1	0.1213	0.3335	0.6586	0.9107	0.9704	1	1	1	1	1	1
IESPGM.PTET51.1.10.224389	Early	1	1	1	1	0.16935	0.2193	0.3649	0.7006	0.90685	0.99195	0.9762	0.9863	0.9904	1	1
IESPGM.PTET51.1.10.225117	Early	1	1	0.9844	1	0.14445	0.2915	0.65585	0.64205	0.9758	0.9508	0.9935	1	1	1	1
IESPGM.PTET51.1.10.22650	Early	1	1	0.9821	1	0.09095	0.3426	0.78075	0.8775	0.99515	0.9802	1	1	1	1	1
IESPGM.PTET51.1.10.231428	Early	1	1	1	0.99165	0.0871	0.2369	0.59585	0.8571	0.9651	0.971	1	1	1	1	1
IESPGM.PTET51.1.10.231883	Early	0.9934	1	0.9875	0.9952	0.22985	0.2661	0.5476	0.75385	0.90005	0.9859	0.9853	1	0.99325	1	1
IESPGM.PTET51.1.10.23202	Early	1	0.99375	1	1	0.1035	0.31465	0.5834	0.8089	0.90625	0.99	0.98335	0.99285	1	1	1
IESPGM.PTET51.1.10.234793	Early	1	1	0.99295	1	0.16475	0.11875	0.35355	0.60465	0.7381	0.9173	0.99375	0.99325	1	1	1
IESPGM.PTET51.1.10.241181	Early	1	0.99205	0.9914	1	0.1351	0.1658	0.5335	0.6973	0.8701	0.97845	0.9898	1	0.9878	1	0.99325
IESPGM.PTET51.1.10.249067	Early	1	1	0.9848	0.9907	0.17945	0.27695	0.70575	0.88375	0.94265	1	1	0.99325	1	1	1
IESPGM.PTET51.1.10.252406	Early	1	1	1	0.99535	0.06595	0.1228	0.4815	0.646	0.69085	0.901	0.79985	1	1	1	1
IESPGM.PTET51.1.10.255220	Early	1	1	0.9923	0.9952	0.10265	0.1687	0.43175	0.79175	0.96885	1	1	1	0.9923	1	1
IESPGM.PTET51.1.10.255326	Early	1	1	0.9804	1	0.3077	0.33865	0.582	0.7821	0.9417	0.9579	1	0.99315	1	1	0.99635
IESPGM.PTET51.1.10.256888	Early	1	1	0.994	1	0.1744	0.25035	0.68525	0.8235	0.95115	0.97565	0.98925	1	1	1	1
IESPGM.PTET51.1.10.259436	Early	1	1	0.9902	1	0.16445	0.18375	0.67185	0.80415	0.96395	1	1	1	1	1	1
IESPGM.PTET51.1.10.26358	Early	1	1	1	1	0.16525	0.28675	0.60055	0.8305	0.92095	0.96695	0.9222	0.99205	1	1	0.99455
IESPGM.PTET51.1.10.265120	Early	1	0.99285	0.9898	1	0.0417	0.1561	0.3523	0.636	0.91315	0.99255	0.9508	1	0.99315	1	1
IESPGM.PTET51.1.10.270660	Early	1	1	1	1	0.0606	0.1745	0.55755	0.7608	0.93115	0.9237	0.9881	0.99385	1	1	1
IESPGM.PTET51.1.10.27726	Early	1	1	0.9529	1	0.11235	0.15785	0.53195	0.83565	0.841	0.9652	1	0.99075	1	1	1
IESPGM.PTET51.1.10.297765	Early	1	1	1	1	0.13205	0.2601	0.6061	0.8817	0.967	0.9735	1	0.99105	0.9918	1	1
IESPGM.PTET51.1.10.302523	Early	1	1	1	1	0.21525	0.35045	0.5274	0.8409	0.90565	0.9365	0.92445	0.99165	1	1	1
IESPGM.PTET51.1.10.311850	Early	1	1	0.98385	1	0.07945	0.25955	0.35675	0.5128	0.8421	0.92475	0.9622	0.99335	1	1	1
IESPGM.PTET51.1.10.321925	Early	1	1	0.98235	1	0.22845	0.22675	0.6658	0.86125	1	0.9944	1	0.9773	0.9878	1	1
IESPGM.PTET51.1.10.322503	Early	1	1	0.9875	0.99585	0.13715	0.23705	0.6903	0.94765	0.99165	1	1	0.9935	0.9935	1	0.99555
IESPGM.PTET51.1.10.333643	Early	1	1	0.9947	0.99565	0.0816	0.23455	0.3278	0.5692	0.7928	0.94345	0.9699	0.9878	1	1	1
IESPGM.PTET51.1.10.334984	Early	1	0.99305	0.9939	1	0.1856	0.1861	0.5461	0.8283	0.88725	0.9712	0.97645	0.9878	1	1	1
IESPGM.PTET51.1.10.338543	Early	1	1	1	1	0.1417	0.2951	0.36715	0.7511	0.8176	0.97185	0.98825	0.99295	1	1	1
IESPGM.PTET51.1.10.339608	Early	1	1	0.9888	1	0.1504	0.3739	0.66075	0.88255	0.96145	0.97145	0.9487	1	0.9878	1	0.9947
IESPGM.PTET51.1.10.339950	Early	1	1	0.9804	1	0.0583	0.1941	0.4784	0.66805	0.93335	0.901	0.9497	0.99255	1	0.95	0.9907
IESPGM.PTET51.1.10.350037	Early	1	1	1	1	0.02	0.16535	0.3761	0.7226	0.892	0.9697	0.9793	0.9848	1	1	1
IESPGM.PTET51.1.10.35274	Early	1	1	1	1	0.2639	0.34575	0.53625	0.79475	0.99315	0.95225	1	1	1	1	1
IESPGM.PTET51.1.10.353582	Early	1	1	0.99055	1	0.0716	0.2832	0.7041	0.8739	0.95545	0.9859	1	1	1	1	1
IESPGM.PTET51.1.10.358822	Early	1	1	0.9901	1	0.25005	0.2229	0.48565	0.734	0.9492	1	1	1	1	1	1
IESPGM.PTET51.1.10.365197	Early	1	1	0.99365	1	0.17945	0.2269	0.5395	0.77555	0.92405	0.97155	0.98195	1	1	1	1
IESPGM.PTET51.1.10.367149	Early	1	1	0.99255	1	0.0808	0.15545	0.54565	0.76735	0.8879	0.97565	0.994	1	1	1	0.99565
IESPGM.PTET51.1.10.370649	Early	1	1	1	1	0.1456	0.21845	0.53785	0.8826	0.97825	0.9923	1	0.9836	1	1	1
IESPGM.PTET51.1.10.375404	Early	1	1	1	0.9951	0.14245	0.16145	0.41035	0.68195	0.7385	0.8577	0.81665	1	0.9855	1	1
IESPGM.PTET51.1.10.378840	Early	1	1	1	1	0.1381	0.1947	0.35255	0.63415	0.7599	0.9802	0.97405	0.9936	1	1	1
IESPGM.PTET51.1.10.391245	Early	1	1	0.9846	1	0.16965	0.21255	0.63225	0.81745	0.93845	1	0.9778	1	1	1	0.9953
IESPGM.PTET51.1.10.401654	Early	1	1	1	1	0.08695	0.1875	0.37385	0.48235	0.72875	0.95245	0.91255	0.9936	1	1	0.9934
IESPGM.PTET51.1.10.40590	Early	1	0.99155	1	0.99495	0.0459000000000001	0.21045	0.36595	0.6251	0.67925	0.9153	0.9922	1	1	1	0.99455
IESPGM.PTET51.1.10.408858	Early	1	1	0.99375	1	0.14415	0.22305	0.7543	0.8009	0.9629	0.9934	1	1	1	1	1
IESPGM.PTET51.1.10.40926	Early	1	1	1	0.99555	0.15565	0.2501	0.45625	0.7693	0.9028	0.9663	0.99505	1	1	1	1
IESPGM.PTET51.1.10.447668	Early	1	1	0.9944	1	0.16145	0.31855	0.5708	0.82385	0.98575	1	0.97795	1	0.99385	1	0.99555
IESPGM.PTET51.1.10.44768	Early	1	0.9945	0.9946	1	0.16345	0.20015	0.55215	0.77525	0.891	0.9737	0.9231	1	0.9814	1	1
IESPGM.PTET51.1.10.455981	Early	1	1	0.95675	1	0.0298499999999999	0.33355	0.75545	0.7681	0.9222	1	1	1	0.97825	0.9865	0.9865
IESPGM.PTET51.1.10.45820	Early	1	1	0.99255	0.99555	0.1034	0.25055	0.5484	0.84575	0.9141	0.994	0.9935	0.9935	1	1	1
IESPGM.PTET51.1.10.461841	Early	1	0.99365	0.99365	1	0.162	0.28105	0.48895	0.8534	0.8588	0.97115	0.99375	0.9922	1	1	0.98945
IESPGM.PTET51.1.10.470321	Early	1	1	1	1	0.2169	0.13915	0.5675	0.70895	0.86815	0.96505	1	1	1	1	1
IESPGM.PTET51.1.10.473604	Early	1	1	0.9681	1	0.0929500000000001	0.1695	0.40795	0.6996	0.8665	0.9909	0.9597	0.98835	1	1	0.9884
IESPGM.PTET51.1.10.474402	Early	1	1	1	1	0.1755	0.18525	0.6556	0.905	0.943	1	1	1	1	1	1
IESPGM.PTET51.1.10.475656	Early	1	1	1	0.98875	0.1348	0.26965	0.63375	0.7377	0.9909	0.9758	1	1	1	0.98915	0.9903
IESPGM.PTET51.1.10.489557	Early	1	1	0.975	0.9818	0.14955	0.19445	0.50505	0.75905	0.8708	0.96895	0.9615	1	1	1	0.99455
IESPGM.PTET51.1.10.493028	Early	1	1	1	0.9923	0.03775	0.25025	0.6603	0.7079	0.9333	0.9347	0.97395	1	1	1	0.9946
IESPGM.PTET51.1.10.493526	Early	1	1	1	1	0.18205	0.245	0.61715	0.73055	0.80365	0.9839	1	0.99155	1	1	1
IESPGM.PTET51.1.10.49642	Early	1	1	0.9923	1	0.0657000000000001	0.2623	0.6394	0.86785	0.9615	1	1	1	1	1	1
IESPGM.PTET51.1.10.502848	Early	1	1	0.9851	1	0.09045	0.23315	0.4592	0.7103	0.74045	0.77205	0.9063	1	0.9818	0.9865	1
IESPGM.PTET51.1.10.504433	Early	1	1	1	1	0.1287	0.24105	0.6718	0.84345	0.98045	1	1	1	1	1	1
IESPGM.PTET51.1.10.518416	Early	1	1	1	0.9881	0.1169	0.15585	0.7137	0.8396	0.9189	1	0.9706	0.98075	1	1	1
IESPGM.PTET51.1.10.52340	Early	1	1	0.98115	1	0.0204500000000001	0.16405	0.5576	0.82575	0.9744	1	1	1	1	1	1
IESPGM.PTET51.1.10.53335	Early	1	1	1	0.9811	0.127	0.10145	0.3682	0.558	0.7963	0.975	1	1	1	1	1
IESPGM.PTET51.1.10.54455	Early	1	1	0.99	1	0.0728500000000001	0.1176	0.38505	0.5218	0.75475	0.88005	0.8933	1	1	1	1
IESPGM.PTET51.1.10.552921	Early	1	1	1	1	0.0561	0.11965	0.31305	0.49125	0.83995	0.9851	0.9451	0.9889	0.99325	0.98115	1
IESPGM.PTET51.1.10.553485	Early	1	1	1	1	0.15005	0.27715	0.7769	0.9353	0.9955	1	1	1	1	1	1
IESPGM.PTET51.1.10.554032	Early	1	1	0.99325	1	0.20415	0.2846	0.68735	0.8719	0.9842	0.99125	1	1	1	1	1
IESPGM.PTET51.1.10.559539	Early	1	1	0.9865	1	0.13865	0.25835	0.68535	0.87325	0.9845	0.96185	1	1	1	0.9909	0.9944
IESPGM.PTET51.1.10.574325	Early	1	0.99265	1	1	0	0.15565	0.4201	0.7275	0.90785	0.99125	1	1	1	1	1
IESPGM.PTET51.1.10.577209	Early	1	1	0.99125	0.9945	0.23605	0.2662	0.6158	0.82745	0.76925	0.96555	0.92565	0.98115	1	0.9889	1
IESPGM.PTET51.1.10.58201	Early	1	1	0.9875	0.995	0.11555	0.19825	0.303	0.6244	0.864	0.9324	0.92375	0.9722	0.9885	1	1
IESPGM.PTET51.1.10.58305	Early	1	1	1	0.9939	0.16145	0.12785	0.3535	0.5982	0.63945	0.9213	0.94715	0.98795	1	1	0.99575
IESPGM.PTET51.1.10.606112	Early	1	1	0.9767	1	0.32755	0.27875	0.55335	0.855	0.97995	0.98245	1	1	0.9942	1	1
IESPGM.PTET51.1.10.61606	Early	1	1	0.9859	1	0.13335	0.25065	0.52185	0.76225	0.911	0.968	1	1	1	1	1
IESPGM.PTET51.1.10.648846	Early	1	0.99165	1	1	0.101	0.15095	0.5581	0.5542	0.7663	0.9855	0.9206	0.9661	1	1	1
IESPGM.PTET51.1.10.650249	Early	1	1	1	1	0.12725	0.24745	0.30295	0.63725	0.80665	0.97725	0.9692	1	1	1	1
IESPGM.PTET51.1.10.65612	Early	1	0.9897	1	1	0.0428999999999999	0.0185	0.36585	0.46735	0.8076	0.9405	0.9909	0.9918	1	0.9889	1
IESPGM.PTET51.1.10.668818	Early	1	0.9804	1	0.9958	0.15735	0.21855	0.36355	0.78155	0.9178	0.9857	0.99125	1	1	1	1
IESPGM.PTET51.1.10.75121	Early	1	1	0.9868	1	0.16635	0.17085	0.7608	0.85215	0.9203	1	0.9545	1	1	1	1
IESPGM.PTET51.1.10.77950	Early	1	1	1	1	0.16705	0.26555	0.7565	0.89315	1	1	1	1	1	0.9889	1
IESPGM.PTET51.1.10.89864	Early	1	1	0.9685	1	0.037	0.1927	0.2741	0.6965	0.74935	0.9286	1	1	0.9885	1	1
IESPGM.PTET51.1.10.92757	Early	1	1	1	0.99515	0.1321	0.10315	0.31685	0.53245	0.78225	0.86235	0.9118	0.989	0.99325	0.99255	1
IESPGM.PTET51.1.10.9489	Early	1	1	0.9923	1	0.0643	0.22675	0.35925	0.71625	0.6464	0.9149	0.84445	0.9773	0.9749	0.9875	1
IESPGM.PTET51.1.100.105510	Early	1	1	1	1	0.209	0.24085	0.52905	0.7203	0.94125	0.9607	1	0.9943	0.9733	0.9796	1
IESPGM.PTET51.1.100.118499	Early	1	1	1	1	0.24	0.3335	0.52545	0.7395	0.87745	0.9818	1	1	1	1	1
IESPGM.PTET51.1.100.119817	Early	1	1	0.9846	1	0.205	0.15335	0.52635	0.7174	0.9704	0.9761	1	0.9818	1	1	1
IESPGM.PTET51.1.100.1212	Early	1	1	0.98245	1	0.1693	0.1601	0.31845	0.63495	0.75715	0.963	0.9846	0.9851	0.99285	1	1
IESPGM.PTET51.1.100.124997	Early	1	1	0.97445	1	0.112	0.1703	0.3877	0.77485	0.9353	0.96225	0.9889	1	0.99335	1	1
IESPGM.PTET51.1.100.141112	Early	1	1	1	0.96	0.1973	0.24245	0.41885	0.6854	0.82635	0.93215	0.9829	0.97525	0.9799	1	1
IESPGM.PTET51.1.100.143834	Early	1	1	0.99325	1	0.13865	0.2295	0.74055	0.9182	0.9914	1	1	1	1	0.99255	1
IESPGM.PTET51.1.100.144290	Early	1	1	1	1	0.17315	0.1569	0.2682	0.77585	0.7271	0.9492	1	1	1	1	1
IESPGM.PTET51.1.100.144378	Early	0.99105	1	1	1	0.26345	0.2669	0.32375	0.7161	0.6963	0.95155	0.96375	0.97845	1	1	1
IESPGM.PTET51.1.100.144459	Early	1	1	1	1	0.2047	0.1741	0.29415	0.57085	0.8061	0.93705	0.9786	0.9818	0.99425	1	0.9944
IESPGM.PTET51.1.100.1472	Early	1	1	1	1	0.19675	0.12345	0.3201	0.7044	0.8726	0.92445	0.84805	1	1	1	1
IESPGM.PTET51.1.100.147746	Early	1	1	1	1	0.22935	0.4018	0.61465	0.78805	0.92795	0.9735	0.97405	0.9865	1	1	1
IESPGM.PTET51.1.100.148010	Early	1	1	1	1	0.0872999999999999	0.17925	0.5402	0.7694	0.92875	1	0.98235	0.9839	1	1	1
IESPGM.PTET51.1.100.155500	Early	1	1	1	1	0.30425	0.30005	0.641	0.9097	0.9108	0.9825	0.95605	1	1	1	1
IESPGM.PTET51.1.100.155735	Early	1	0.9902	0.9877	1	0.15715	0.30195	0.74385	0.8462	1	1	0.9846	0.99205	0.99285	0.99055	1
IESPGM.PTET51.1.100.164200	Early	1	1	0.99255	1	0.1409	0.1649	0.36235	0.5569	0.79425	0.8871	0.9186	0.9902	1	1	0.97655
IESPGM.PTET51.1.100.166442	Early	1	1	0.98305	0.99285	0.1125	0.20525	0.3818	0.7395	0.86005	0.94155	1	0.9722	0.9857	1	0.9944
IESPGM.PTET51.1.100.168058	Early	1	1	1	1	0.1364	0.3424	0.68175	0.76195	0.9224	0.9439	0.9459	1	0.9804	1	1
IESPGM.PTET51.1.100.168456	Early	1	1	1	0.99305	0.0808500000000001	0.0800000000000001	0.15975	0.6429	1	1	1	1	1	1	1
IESPGM.PTET51.1.100.1732	Early	1	1	0.9844	1	0.07555	0.1964	0.23465	0.68295	0.75785	0.98335	0.9946	0.99165	1	1	1
IESPGM.PTET51.1.100.174169	Early	1	1	1	1	0.1273	0.1482	0.3107	0.5714	0.78335	0.8889	0.9487	0.98685	0.99295	1	1
IESPGM.PTET51.1.100.178684	Early	1	1	1	1	0.1174	0.3459	0.76595	0.83965	0.9706	1	1	0.99055	1	1	0.9894
IESPGM.PTET51.1.100.181217	Early	1	1	1	1	0.2064	0.15245	0.5427	0.8392	0.8991	0.97155	1	0.9808	1	1	1
IESPGM.PTET51.1.100.185266	Early	1	1	1	1	0.1611	0.3002	0.5122	0.81425	0.862	0.99315	0.97355	0.9918	1	1	1
IESPGM.PTET51.1.100.191243	Early	1	1	1	1	0.0655	0.26325	0.4057	0.61965	0.73745	0.95405	0.8878	0.99335	1	1	1
IESPGM.PTET51.1.100.193031	Early	1	1	1	0.99165	0.10315	0.2096	0.4469	0.77315	0.8576	0.98485	0.91145	0.99105	1	1	1
IESPGM.PTET51.1.100.196923	Early	1	1	1	1	0.18035	0.2357	0.71535	0.84795	0.984	1	1	1	1	1	1
IESPGM.PTET51.1.100.199354	Early	1	1	1	1	0.1667	0.18835	0.3998	0.7408	0.8418	0.9396	1	1	0.9878	0.97205	1
IESPGM.PTET51.1.100.199770	Early	1	1	1	0.99335	0.14145	0.20345	0.34845	0.6533	0.60825	0.83655	0.90465	0.9482	0.974	0.9787	0.9945
IESPGM.PTET51.1.100.200773	Early	1	1	0.99265	1	0.20975	0.4496	0.6854	0.7213	0.71845	0.9091	0.9464	0.96785	1	1	1
IESPGM.PTET51.1.100.208139	Early	1	1	0.99295	1	0.1417	0.10745	0.2606	0.602	0.8091	0.9629	0.8999	0.99335	1	1	1
IESPGM.PTET51.1.100.210584	Early	1	1	0.9947	1	0.14835	0.127	0.49755	0.67225	0.93335	0.9814	1	0.9885	0.98835	1	1
IESPGM.PTET51.1.100.211041	Early	1	0.9949	1	1	0.2204	0.1267	0.5576	0.61545	0.871	0.9846	0.9722	1	1	1	1
IESPGM.PTET51.1.100.211305	Early	0.9907	1	0.9851	1	0.06135	0.19675	0.5504	0.61035	0.83595	0.98075	0.99195	1	1	1	1
IESPGM.PTET51.1.100.215662	Early	1	1	0.9943	1	0.0643	0.1881	0.5467	0.82525	1	1	1	1	0.9708	1	1
IESPGM.PTET51.1.100.217020	Early	1	0.98865	0.9829	0.9954	0.16995	0.18975	0.4066	0.75455	0.82325	0.9531	0.9384	0.99535	1	1	1
IESPGM.PTET51.1.100.221477	Early	1	1	1	1	0.22595	0.4053	0.64815	0.85155	0.92225	0.9914	0.99335	1	0.99265	1	1
IESPGM.PTET51.1.100.222692	Early	1	0.9565	0.98935	1	0.10165	0.38125	0.7466	0.8967	0.9496	0.99	0.99055	1	1	1	1
IESPGM.PTET51.1.100.224352	Early	1	0.9231	0.9735	1	0.16735	0.267	0.7502	0.81245	0.9323	0.9818	1	1	0.9836	1	0.9886
IESPGM.PTET51.1.100.224435	Early	1	1	1	1	0.1013	0.0811500000000001	0.51055	0.6981	0.987	0.92625	0.9922	1	0.99205	1	1
IESPGM.PTET51.1.100.227794	Early	1	1	0.9902	1	0.06535	0.07345	0.29145	0.5499	0.7401	0.9633	0.9714	0.9902	1	1	1
IESPGM.PTET51.1.100.229690	Early	1	1	0.9923	1	0.20365	0.259	0.7814	0.9236	0.9349	0.9867	0.99255	1	1	1	1
IESPGM.PTET51.1.100.234536	Early	0.9936	1	0.98765	1	0.12505	0.11625	0.28025	0.64	0.82105	0.9724	0.9408	0.9872	1	1	1
IESPGM.PTET51.1.100.237680	Early	1	1	1	0.99545	0.2186	0.3154	0.6643	0.91425	0.977	1	1	0.9942	1	1	0.9944
IESPGM.PTET51.1.100.238715	Early	1	1	1	0.994	0.18695	0.13745	0.50015	0.75635	0.94625	0.9846	0.9776	0.9836	0.99315	1	1
IESPGM.PTET51.1.100.239484	Early	1	1	1	1	0.0604	0.1213	0.3806	0.5369	0.7879	0.92565	0.9048	1	0.9855	1	0.992
IESPGM.PTET51.1.100.24441	Early	1	1	0.9855	1	0.1755	0.3325	0.536	0.7869	0.93455	0.96585	0.96	0.9761	1	1	1
IESPGM.PTET51.1.100.249765	Early	1	1	0.9825	1	0.1248	0.31075	0.5257	0.80815	0.86845	0.9853	1	1	1	1	1
IESPGM.PTET51.1.100.250618	Early	1	1	1	1	0.1009	0.19305	0.3426	0.5563	0.9361	0.9619	1	1	1	1	0.9881
IESPGM.PTET51.1.100.252114	Early	1	1	1	1	0.2367	0.2881	0.50735	0.66865	0.8557	0.95735	0.9045	0.97205	0.989	1	0.99525
IESPGM.PTET51.1.100.256804	Early	1	1	0.99385	1	0.0934999999999999	0.2128	0.43395	0.5748	0.73795	0.9429	0.9875	1	1	1	0.9944
IESPGM.PTET51.1.100.257581	Early	1	1	1	1	0.21765	0.2051	0.6079	0.8841	0.9494	0.96555	0.99475	0.99375	1	1	1
IESPGM.PTET51.1.100.258812	Early	1	1	0.99325	0.9814	0.12145	0.16405	0.31075	0.57665	0.76705	0.92665	0.9093	0.9857	1	1	1
IESPGM.PTET51.1.100.261580	Early	1	1	1	1	0.0672	0.0811500000000001	0.53605	0.7145	0.873	1	1	1	1	1	1
IESPGM.PTET51.1.100.265270	Early	1	1	0.9923	1	0.1601	0.144	0.3856	0.5974	0.72915	0.88715	0.9138	1	0.9868	1	0.9953
IESPGM.PTET51.1.100.266338	Early	1	1	0.9939	1	0.18275	0.2872	0.4795	0.6854	0.83465	0.95425	1	0.97565	1	1	1
IESPGM.PTET51.1.100.269259	Early	1	1	1	1	0.15425	0.2633	0.76785	0.82385	0.9463	1	0.9855	1	0.9761	1	1
IESPGM.PTET51.1.100.274282	Early	1	1	1	1	0.22675	0.17565	0.4977	0.6768	0.9294	0.93465	1	0.9853	0.9942	1	1
IESPGM.PTET51.1.100.276867	Early	1	1	1	0.9943	0.20295	0.2115	0.48385	0.8396	0.91825	0.9474	1	1	1	1	1
IESPGM.PTET51.1.100.280236	Early	1	1	0.9923	0.9884	0.10025	0.1981	0.29375	0.47525	0.85065	0.95575	0.9002	0.9881	0.9942	1	1
IESPGM.PTET51.1.100.281433	Early	1	1	0.9839	0.99315	0.18185	0.1702	0.4568	0.6382	0.8543	0.98215	1	1	0.9875	1	1
IESPGM.PTET51.1.100.282305	Early	1	1	0.99275	1	0.16895	0.3218	0.6818	0.84925	0.9464	0.98275	1	1	1	1	1
IESPGM.PTET51.1.100.284337	Early	1	1	1	1	0.05505	0.29285	0.79385	0.7188	0.9884	1	1	1	1	1	0.9949
IESPGM.PTET51.1.100.285755	Early	1	1	1	1	0.0561	0.0763499999999999	0.3773	0.6346	0.74475	0.91935	0.87655	0.99315	0.99195	1	0.995
IESPGM.PTET51.1.100.29751	Early	1	1	1	1	0.18435	0.2347	0.27745	0.5394	0.75475	0.87135	0.96925	0.98415	1	1	1
IESPGM.PTET51.1.100.309082	Early	1	1	1	1	0.0823	0.32885	0.6107	0.88295	1	0.99195	1	0.9833	1	1	1
IESPGM.PTET51.1.100.310191	Early	1	1	1	1	0.1463	0.2449	0.5399	0.6916	0.93995	0.99155	0.9583	1	1	1	0.9946
IESPGM.PTET51.1.100.348	Early	1	1	0.9868	1	0.10405	0.1461	0.46655	0.6352	0.75355	0.9212	0.9923	1	1	1	1
IESPGM.PTET51.1.100.41363	Early	1	1	1	1	0.1731	0.225	0.38365	0.6459	0.7592	0.9126	0.9909	0.95905	0.9922	0.9922	0.99265
IESPGM.PTET51.1.100.48715	Early	1	1	0.99055	1	0.02725	0.245	0.4311	0.63625	0.8362	0.9334	0.9844	0.99205	0.9884	1	1
IESPGM.PTET51.1.100.49358	Early	1	1	0.9688	1	0.22255	0.26285	0.4783	0.8248	0.89395	0.96055	0.97825	1	1	1	1
IESPGM.PTET51.1.100.52214	Early	1	1	0.98935	1	0.3121	0.2752	0.6843	0.79345	0.92195	1	0.95195	1	0.99295	1	1
IESPGM.PTET51.1.100.57938	Early	1	1	0.9939	1	0.21065	0.26915	0.44615	0.80725	0.8983	0.96945	0.9036	1	0.9939	0.99105	1
IESPGM.PTET51.1.100.5850	Early	1	1	0.99205	1	0.1081	0.15855	0.45965	0.56545	0.90535	0.9196	0.96775	1	1	1	1
IESPGM.PTET51.1.100.600	Early	1	1	0.99155	1	0.21065	0.32155	0.44175	0.70775	0.9224	0.9512	0.98165	1	1	1	1
IESPGM.PTET51.1.100.67583	Early	0.96555	0.9538	0.8986	0.9699	0.08815	0.32945	0.4231	0.6319	0.7961	0.88595	0.92015	0.9292	0.9328	0.95735	0.94905
IESPGM.PTET51.1.100.69872	Early	1	1	0.9831	1	0.15565	0.20165	0.3724	0.74175	0.94415	0.99205	0.98075	0.97905	0.9867	1	1
IESPGM.PTET51.1.100.91197	Early	1	1	1	1	0.14135	0.31745	0.62725	0.8113	0.88295	0.97905	0.9375	1	0.9859	1	0.9802
IESPGM.PTET51.1.100.92947	Early	1	1	0.9941	1	0.3128	0.31225	0.68545	0.7903	0.9291	0.97815	0.98235	1	1	1	1
IESPGM.PTET51.1.100.93006	Early	1	1	1	1	0.1876	0.09355	0.5234	0.6431	0.9337	0.94125	1	1	1	1	1
IESPGM.PTET51.1.100.95199	Early	1	1	0.9934	1	0.16735	0.22875	0.51475	0.6211	0.8379	0.93175	0.96885	0.99445	0.97715	1	1
IESPGM.PTET51.1.101.105686	Early	1	1	0.9857	1	0.0808500000000001	0.1001	0.40715	0.6136	0.80005	0.9	0.98	1	0.9934	1	1
IESPGM.PTET51.1.101.10783	Early	1	0.99265	0.9808	1	0.0846499999999999	0.12915	0.3861	0.6916	0.87265	0.92725	0.92855	1	1	1	0.99515
IESPGM.PTET51.1.101.111129	Early	1	1	0.99255	1	0.1348	0.1016	0.2432	0.58345	0.76355	0.96555	0.97655	0.99375	1	0.9898	1
IESPGM.PTET51.1.101.113273	Early	1	1	0.9922	0.9855	0.10525	0.36065	0.52545	0.65405	0.8189	0.95735	1	1	0.9878	1	0.99525
IESPGM.PTET51.1.101.114019	Early	1	1	1	1	0.24195	0.28365	0.63055	0.8571	0.97805	1	1	1	0.98915	1	1
IESPGM.PTET51.1.101.118186	Early	1	1	1	1	0.11835	0.1188	0.53865	0.76275	0.93925	0.96235	0.9873	1	1	1	1
IESPGM.PTET51.1.101.121504	Early	1	1	0.9831	1	0.14585	0.26335	0.49145	0.60055	0.69195	0.9262	0.97765	0.9857	1	1	1
IESPGM.PTET51.1.101.124071	Early	0.9949	1	1	0.99455	0.13795	0.19755	0.2031	0.61195	0.83085	0.99275	0.96835	0.99285	0.99155	1	0.98685
IESPGM.PTET51.1.101.132663	Early	1	1	1	0.99295	0.0985	0.1452	0.4159	0.76765	0.92595	1	0.98865	1	1	1	1
IESPGM.PTET51.1.101.134411	Early	1	1	0.98165	1	0.0801000000000001	0.18335	0.33775	0.5715	0.8397	0.9322	0.81065	0.9855	1	1	1
IESPGM.PTET51.1.101.141400	Early	1	0.99445	0.99265	1	0.23755	0.1015	0.36005	0.61745	0.8508	0.97275	0.95315	1	1	1	1
IESPGM.PTET51.1.101.14291	Early	1	1	1	1	0.2174	0.281	0.7285	0.9068	0.9935	1	0.9592	1	0.994	1	0.994
IESPGM.PTET51.1.101.149403	Early	1	1	0.98245	1	0.1478	0.3444	0.56945	0.8151	0.9695	0.99055	1	0.99	1	1	1
IESPGM.PTET51.1.101.151549	Early	1	1	0.99055	0.9865	0.1757	0.1351	0.69335	0.8456	0.9692	1	1	0.9773	1	1	0.9918
IESPGM.PTET51.1.101.155531	Early	1	1	0.9923	1	0.05335	0.20835	0.4239	0.8348	0.91955	0.98765	0.9904	1	0.97815	1	1
IESPGM.PTET51.1.101.155692	Early	1	0.99155	0.99205	1	0.1781	0.3366	0.57275	0.8113	0.9683	0.9846	1	1	1	1	1
IESPGM.PTET51.1.101.157167	Early	0.9945	1	1	1	0.15275	0.1246	0.31555	0.68335	0.8462	0.99055	0.97415	0.98295	1	1	0.99485
IESPGM.PTET51.1.101.158848	Early	1	1	0.9914	1	0.05355	0.21335	0.70665	0.8574	0.97565	0.9851	0.9904	1	0.9859	1	1
IESPGM.PTET51.1.101.160490	Early	1	1	1	0.9811	0.023	0.20785	0.4517	0.5642	0.86285	0.87055	0.84785	0.9839	0.9935	1	1
IESPGM.PTET51.1.101.161251	Early	0.9952	0.9903	0.99275	0.9934	0.1134	0.20485	0.5008	0.6555	0.83045	0.8889	0.91505	0.97845	1	1	1
IESPGM.PTET51.1.101.161943	Early	1	1	1	1	0.06595	0.22005	0.5538	0.6667	0.89335	0.9497	0.98275	1	1	0.9574	1
IESPGM.PTET51.1.101.163407	Early	1	1	1	0.9839	0.15715	0.2333	0.49345	0.71325	0.85505	0.9697	1	1	0.9934	0.98935	1
IESPGM.PTET51.1.101.16763	Early	1	1	1	1	0.11385	0.1561	0.58185	0.6794	0.7459	0.97965	0.9537	0.9844	1	1	1
IESPGM.PTET51.1.101.176282	Early	0.99325	1	0.99275	0.98935	0.21325	0.23905	0.7139	0.9175	0.96285	0.99295	0.97885	1	1	1	1
IESPGM.PTET51.1.101.17694	Early	1	1	1	1	0.2332	0.25035	0.539	0.82205	0.95845	0.9787	1	0.99285	1	1	0.99455
IESPGM.PTET51.1.101.177504	Early	0.9836	0.9825	1	1	0.2022	0.1947	0.388	0.53515	0.74285	0.8684	0.93665	0.97745	1	1	1
IESPGM.PTET51.1.101.181669	Early	1	1	1	1	0.0658	0.2274	0.4706	0.71945	0.8649	0.9466	0.97725	1	1	1	1
IESPGM.PTET51.1.101.182242	Early	1	0.9863	1	1	0.10265	0.18035	0.2851	0.5923	0.8166	0.89875	0.9758	0.9859	1	1	0.9895
IESPGM.PTET51.1.101.183653	Early	1	0.98165	0.9853	1	0.24765	0.2186	0.35285	0.56275	0.8814	0.83225	0.905	0.974	0.9394	1	1
IESPGM.PTET51.1.101.187824	Early	1	1	1	1	0.14475	0.10455	0.30435	0.6257	0.76565	0.94855	0.96	0.9844	0.9935	1	1
IESPGM.PTET51.1.101.190476	Early	1	1	0.97445	1	0.16095	0.23415	0.63925	0.87925	0.9644	0.9828	1	1	1	1	1
IESPGM.PTET51.1.101.193448	Early	1	1	0.99275	1	0.05505	0.22765	0.86655	0.77395	0.9781	0.97565	1	1	1	1	1
IESPGM.PTET51.1.101.197046	Early	1	1	0.9922	1	0.14815	0.122	0.7766	0.8117	1	1	1	1	1	1	1
IESPGM.PTET51.1.101.197874	Early	1	1	0.9923	1	0.169	0.29405	0.5571	0.8018	0.8519	0.92065	0.95455	1	0.99325	1	0.9907
IESPGM.PTET51.1.101.204739	Early	1	1	1	1	0.3097	0.2836	0.3848	0.597	0.60955	0.89835	0.879	0.9894	1	1	1
IESPGM.PTET51.1.101.206070	Early	1	1	1	0.9889	0.1017	0.242	0.74445	0.9482	0.96825	0.9846	1	1	1	1	1
IESPGM.PTET51.1.101.208813	Early	1	1	1	1	0.21845	0.1386	0.3317	0.662	0.74755	0.93885	0.9408	1	1	1	1
IESPGM.PTET51.1.101.20888	Early	1	1	1	1	0.19045	0.21215	0.4812	0.69835	0.8393	0.88235	0.95875	1	0.96355	1	1
IESPGM.PTET51.1.101.216344	Early	1	1	0.97305	1	0.2192	0.2762	0.65255	0.8835	0.82355	1	1	1	1	1	0.99365
IESPGM.PTET51.1.101.216916	Early	1	1	0.95805	0.99105	0.05965	0.1891	0.4845	0.77075	0.8409	0.9186	0.94685	1	1	1	0.99495
IESPGM.PTET51.1.101.218828	Early	1	1	1	1	0.18045	0.2698	0.68905	0.77215	0.9922	0.97845	1	1	1	1	1
IESPGM.PTET51.1.101.221947	Early	1	0.9918	1	1	0.1796	0.23665	0.5138	0.60715	0.7001	0.90735	0.9016	0.99255	0.9909	1	1
IESPGM.PTET51.1.101.225890	Early	1	1	0.9805	1	0.2792	0.3879	0.69955	0.77225	0.94775	0.9909	0.99295	1	0.99325	1	1
IESPGM.PTET51.1.101.227820	Early	1	1	1	1	0.19575	0.2388	0.56385	0.7273	0.9697	0.9902	0.9206	1	1	0.9909	0.9953
IESPGM.PTET51.1.101.228503	Early	1	1	1	1	0.3133	0.23155	0.45275	0.6508	0.95875	0.9882	0.9735	0.9943	1	1	1
IESPGM.PTET51.1.101.231433	Early	1	1	0.9935	1	0.12	0.23935	0.38145	0.667	0.81855	0.86275	0.9533	0.9942	0.99455	0.99155	1
IESPGM.PTET51.1.101.232042	Early	1	1	1	1	0.2761	0.28055	0.7104	0.87675	0.9861	1	0.92325	1	1	1	1
IESPGM.PTET51.1.101.232706	Early	1	0.9896	0.9846	1	0.05785	0.0691999999999999	0.40375	0.69165	0.8562	0.9296	0.9796	0.98915	0.987	1	1
IESPGM.PTET51.1.101.236578	Early	0.9924	1	1	1	0.15575	0.43175	0.64885	0.8348	0.8596	0.9818	1	1	1	1	1
IESPGM.PTET51.1.101.244954	Early	1	1	1	1	0.11895	0.17615	0.39875	0.55665	0.8011	0.9904	0.97515	1	0.9934	1	1
IESPGM.PTET51.1.101.250284	Early	1	1	1	1	0.0498000000000001	0.0899	0.4684	0.5518	0.70765	0.90295	0.89535	1	1	1	1
IESPGM.PTET51.1.101.254122	Early	1	1	1	0.99495	0.24105	0.18795	0.49645	0.5017	0.71205	0.92445	0.98295	1	0.99285	1	1
IESPGM.PTET51.1.101.258834	Early	0.9924	1	1	1	0.1929	0.265	0.5706	0.76445	0.90135	0.99125	1	1	0.98185	1	0.99525
IESPGM.PTET51.1.101.264077	Early	1	1	1	1	0.2727	0.22875	0.74775	0.894	0.9036	0.9612	1	0.98685	1	0.99055	0.99205
IESPGM.PTET51.1.101.275868	Early	1	1	0.9474	1	0.1398	0.2937	0.5378	0.61455	0.82865	0.9231	0.9846	0.968	1	1	1
IESPGM.PTET51.1.101.276534	Early	1	1	1	1	0.0233	0.0981	0.51965	0.89125	1	0.9821	1	1	1	1	1
IESPGM.PTET51.1.101.277099	Early	1	1	1	1	0.18035	0.2174	0.7017	0.835	1	0.9807	1	1	1	1	1
IESPGM.PTET51.1.101.300336	Early	1	1	1	1	0.11975	0.23695	0.74225	0.8952	0.9815	1	1	1	1	0.9904	1
IESPGM.PTET51.1.101.303255	Early	1	1	0.99475	0.99455	0	0.2111	0.7877	0.8709	0.93985	0.98765	1	0.99315	1	1	1
IESPGM.PTET51.1.101.306318	Early	1	1	1	1	0.11235	0.231	0.59685	0.77285	0.9804	0.9867	1	1	1	1	1
IESPGM.PTET51.1.101.41863	Early	1	0.9785	0.99155	1	0.1653	0.2619	0.56295	0.776	0.91055	0.9844	0.93885	1	1	1	1
IESPGM.PTET51.1.101.440	Early	1	1	1	0.99165	0.07335	0.12125	0.29805	0.675	0.77585	0.9107	0.97185	1	1	1	1
IESPGM.PTET51.1.101.53271	Early	1	1	1	1	0.14735	0.16115	0.40615	0.6261	0.80215	0.9633	0.9543	1	1	1	1
IESPGM.PTET51.1.101.57569	Early	1	1	0.99285	1	0.23785	0.32745	0.64295	0.8824	0.91535	0.9923	0.9444	1	1	1	1
IESPGM.PTET51.1.101.60413	Early	1	1	0.99375	1	0.24585	0.2667	0.67855	0.85025	0.974	0.98795	0.981	0.99315	1	1	1
IESPGM.PTET51.1.101.62870	Early	1	0.9706	1	1	0.1788	0.1444	0.466	0.57245	0.91965	0.9923	0.9597	1	1	0.9831	0.99515
IESPGM.PTET51.1.101.68933	Early	1	0.9923	0.9914	1	0.0490999999999999	0.16865	0.5277	0.70535	0.93445	0.9796	0.9914	0.97095	1	1	1
IESPGM.PTET51.1.101.70274	Early	1	0.9815	1	1	0.17675	0.0710999999999999	0.3962	0.62	0.89765	0.9878	1	1	1	1	1
IESPGM.PTET51.1.101.80608	Early	1	1	1	1	0.27385	0.26575	0.60145	0.7826	0.95115	0.9677	1	1	1	1	1
IESPGM.PTET51.1.101.84812	Early	1	0.99125	0.9799	1	0.0808500000000001	0.17	0.3279	0.62965	0.8004	0.9337	0.91475	0.97445	0.99475	1	1
IESPGM.PTET51.1.101.98453	Early	1	0.8571	0.9656	0.9714	0.1707	0.25355	0.4955	0.6585	0.8668	0.873	1	1	0.973	1	1
IESPGM.PTET51.1.101.99755	Early	1	1	0.9904	1	0.0722499999999999	0.0865	0.29865	0.5723	0.7579	0.9479	0.92	1	1	1	1
IESPGM.PTET51.1.102.100495	Early	1	1	1	1	0.0858000000000001	0.12535	0.29975	0.65745	0.81535	0.95455	0.98415	0.99265	1	1	1
IESPGM.PTET51.1.102.106802	Early	1	1	1	0.99325	0.08525	0.1353	0.4354	0.65895	0.92445	0.9655	1	1	1	1	1
IESPGM.PTET51.1.102.108512	Early	1	1	1	1	0.11605	0.11465	0.45915	0.76525	0.9128	0.98485	0.97835	0.99305	1	1	1
IESPGM.PTET51.1.102.126400	Early	1	1	1	0.9846	0.1067	0.39705	0.47095	0.6447	0.831	0.8952	0.9444	0.9792	1	1	1
IESPGM.PTET51.1.102.127566	Early	1	1	0.9914	1	0.12035	0.0846	0.24955	0.559	0.8908	0.91895	0.99325	1	1	1	1
IESPGM.PTET51.1.102.128234	Early	1	1	1	1	0.15565	0.2804	0.5375	0.83565	0.9036	0.9807	0.99275	1	1	1	1
IESPGM.PTET51.1.102.129940	Early	1	1	1	1	0.1395	0.10405	0.4874	0.73045	0.90415	0.9722	0.9706	1	0.9836	1	1
IESPGM.PTET51.1.102.134732	Early	1	1	1	1	0.13015	0.40625	0.59245	0.8495	0.8879	1	0.98935	1	1	1	1
IESPGM.PTET51.1.102.137216	Early	1	1	0.994	0.98	0.12385	0.10115	0.56775	0.40025	0.8983	0.93125	0.92875	0.99375	1	1	1
IESPGM.PTET51.1.102.144114	Early	1	1	1	1	0.2177	0.2921	0.70155	0.89585	1	1	0.9241	1	1	1	1
IESPGM.PTET51.1.102.145832	Early	1	1	0.9943	1	0.2444	0.25325	0.6751	0.7845	0.9471	0.9804	1	0.9867	1	1	1
IESPGM.PTET51.1.102.146546	Early	1	1	0.9941	0.9952	0.20835	0.3021	0.48675	0.5364	0.85835	0.94935	0.973	0.988	1	1	1
IESPGM.PTET51.1.102.146661	Early	1	0.9836	0.96505	1	0.14955	0.22595	0.37985	0.60095	0.76225	0.8431	0.8722	0.9726	0.98295	1	0.9944
IESPGM.PTET51.1.102.148078	Early	1	1	1	1	0.2766	0.1667	0.5938	0.77235	0.8761	0.9466	0.962	1	0.9831	1	1
IESPGM.PTET51.1.102.148345	Early	1	1	1	1	0.1807	0.30165	0.68745	0.849	0.909	0.97565	0.988	0.99195	1	1	1
IESPGM.PTET51.1.102.159398	Early	1	0.9857	1	1	0.15185	0.3543	0.68135	0.6842	0.87895	0.99205	0.977	1	1	1	1
IESPGM.PTET51.1.102.169781	Early	1	1	0.99285	1	0.06365	0.2318	0.6721	0.8439	0.9896	1	1	1	0.9855	1	0.9945
IESPGM.PTET51.1.102.170563	Early	1	1	1	1	0.14655	0.2327	0.63165	0.88325	0.9731	0.9836	1	1	1	1	1
IESPGM.PTET51.1.102.171869	Early	1	1	1	0.9885	0.1674	0.1755	0.65195	0.87945	0.9392	0.9841	1	0.99365	1	1	1
IESPGM.PTET51.1.102.173711	Early	1	1	0.9934	1	0.22035	0.2361	0.71235	0.7744	0.93995	0.98305	1	0.9924	0.99335	1	1
IESPGM.PTET51.1.102.179155	Early	1	1	1	1	0.1539	0.22645	0.34645	0.5959	0.9804	0.9646	0.9878	1	1	1	1
IESPGM.PTET51.1.102.181718	Early	1	1	0.9863	1	0.1348	0.36395	0.6987	0.9231	0.9889	0.99285	1	1	1	0.9756	0.9898
IESPGM.PTET51.1.102.187300	Early	0.9897	0.99205	1	1	0.18185	0.3619	0.54685	0.83015	0.83975	0.99205	0.9379	1	1	1	1
IESPGM.PTET51.1.102.188666	Early	1	1	1	1	0.1106	0.27855	0.7838	0.8333	0.99105	1	1	1	1	1	1
IESPGM.PTET51.1.102.194317	Early	1	1	0.9804	0.9804	0.2449	0.1461	0.37585	0.61165	0.69015	0.8841	0.90385	0.9652	1	1	1
IESPGM.PTET51.1.102.198572	Early	1	1	0.97645	0.99305	0.2444	0.35265	0.6364	0.85215	0.833	1	0.9481	1	1	0.9914	1
IESPGM.PTET51.1.102.200268	Early	1	1	1	1	0.1641	0.4365	0.70875	0.7761	0.9565	0.99315	0.9865	0.9877	1	1	0.9884
IESPGM.PTET51.1.102.211271	Early	0.991	1	0.9882	1	0.2117	0.24685	0.5604	0.6943	0.7982	0.9385	0.9723	1	1	1	1
IESPGM.PTET51.1.102.211516	Early	1	1	1	1	0.2681	0.32665	0.47645	0.7522	0.9786	0.9857	0.98585	0.9944	1	1	1
IESPGM.PTET51.1.102.216628	Early	1	1	0.9941	1	0.12615	0.18425	0.53965	0.80795	0.8678	0.9914	0.9881	0.99325	1	1	1
IESPGM.PTET51.1.102.221002	Early	1	1	0.9853	1	0.19345	0.1936	0.40435	0.74845	0.946	0.99295	0.9853	0.9936	1	1	1
IESPGM.PTET51.1.102.221815	Early	1	1	0.9818	1	0.1731	0.28	0.4856	0.8214	0.94775	0.99125	1	0.9896	0.99155	0.9787	0.9935
IESPGM.PTET51.1.102.231479	Early	1	0.99195	1	1	0.0801499999999999	0.1848	0.53655	0.74865	0.8656	0.9315	0.89375	0.9942	0.9857	1	1
IESPGM.PTET51.1.102.233799	Early	1	1	0.9797	0.9951	0.0216499999999999	0.14045	0.1619	0.58575	0.84895	0.91265	0.93845	1	1	1	1
IESPGM.PTET51.1.102.238217	Early	1	1	0.9914	0.9828	0.275	0.3318	0.70405	0.82635	0.87745	0.99275	0.96785	1	1	0.98935	0.99495
IESPGM.PTET51.1.102.240230	Early	1	1	1	0.97965	0.3563	0.1461	0.6547	0.8841	0.99265	0.9831	1	0.9844	1	1	1
IESPGM.PTET51.1.102.245921	Early	1	0.9785	1	0.9802	0.04555	0.15915	0.4563	0.56165	0.826	1	0.95425	1	0.9858	1	1
IESPGM.PTET51.1.102.246085	Early	1	1	1	1	0.1607	0.1678	0.3954	0.64945	0.8131	0.95245	0.9398	1	1	1	1
IESPGM.PTET51.1.102.249528	Early	1	1	0.99255	1	0.1264	0.123	0.4055	0.62735	0.7522	0.9708	0.92035	0.9924	0.9867	1	1
IESPGM.PTET51.1.102.250259	Early	1	1	0.99265	0.9896	0.08195	0.107	0.3653	0.57775	0.77605	0.99055	0.90895	0.9799	1	1	1
IESPGM.PTET51.1.102.254773	Early	1	1	0.9934	1	0.17485	0.13395	0.5117	0.62515	0.85325	0.92725	0.8153	1	1	1	1
IESPGM.PTET51.1.102.255707	Early	1	1	0.99325	1	0.19065	0.22035	0.48665	0.7108	0.91305	0.9074	0.95335	1	1	1	1
IESPGM.PTET51.1.102.256380	Early	1	1	1	1	0.1154	0.13795	0.5785	0.7768	0.97435	0.9941	1	0.99265	1	1	1
IESPGM.PTET51.1.102.256550	Early	1	1	1	1	0.0486500000000001	0.252	0.429	0.717	0.83625	0.99295	1	1	1	1	1
IESPGM.PTET51.1.102.256912	Early	1	1	0.9934	0.9922	0.1707	0.1028	0.267	0.49285	0.9495	0.9855	1	1	1	1	1
IESPGM.PTET51.1.102.260961	Early	1	1	0.99335	0.99205	0.11475	0.1381	0.20485	0.60145	0.8609	0.87305	0.9242	1	1	1	1
IESPGM.PTET51.1.102.262958	Early	1	1	0.9923	1	0.1417	0.12045	0.47435	0.5939	0.91405	0.9633	0.95485	1	1	1	1
IESPGM.PTET51.1.102.263530	Early	1	0.99425	1	1	0.0644	0.199	0.2869	0.49745	0.7849	0.93585	0.9212	1	1	1	1
IESPGM.PTET51.1.102.263614	Early	1	0.99305	0.9774	1	0.0957	0.29425	0.73475	0.94175	0.99615	1	1	1	1	1	1
IESPGM.PTET51.1.102.264084	Early	1	1	0.9855	0.99105	0.16465	0.305	0.44765	0.56625	0.7187	0.8099	0.97945	1	0.9898	0.94635	1
IESPGM.PTET51.1.102.265328	Early	1	1	0.9579	0.9935	0.0751500000000001	0.2829	0.45715	0.629	0.73265	0.95675	0.9568	0.9943	0.9799	0.99055	0.9941
IESPGM.PTET51.1.102.266028	Early	1	1	1	1	0.3396	0.24245	0.7424	0.83915	0.8798	0.93375	0.9293	1	1	1	1
IESPGM.PTET51.1.102.266142	Early	1	1	0.9935	1	0.1194	0.1347	0.4279	0.6002	0.76795	0.9396	0.88145	0.9867	1	0.9902	1
IESPGM.PTET51.1.102.283859	Early	1	0.9667	1	1	0.0925499999999999	0.18865	0.3673	0.6612	0.895	0.9607	1	1	0.9814	1	1
IESPGM.PTET51.1.102.286718	Early	1	0.95455	0.9804	1	0.1548	0.1839	0.55795	0.7718	0.9524	0.94125	1	0.9814	1	1	1
IESPGM.PTET51.1.102.286739	Early	1	1	0.9918	1	0.20335	0.3192	0.69305	0.95485	0.98125	0.9831	0.9859	1	0.9853	1	1
IESPGM.PTET51.1.102.289278	Early	1	1	1	0.9802	0.13665	0.2691	0.5915	0.8197	0.93195	0.99205	0.96105	1	1	1	1
IESPGM.PTET51.1.102.293051	Early	1	1	1	0.9825	0.3158	0.3401	0.59125	0.8008	0.8792	0.92795	0.9481	1	1	1	1
IESPGM.PTET51.1.102.300914	Early	1	1	0.97205	0.9904	0.1633	0.24105	0.63765	0.85155	0.8596	0.9851	1	1	1	1	1
IESPGM.PTET51.1.102.30307	Early	1	1	1	0.9833	0.3916	0.4202	0.4959	0.94665	0.9128	0.99195	1	1	0.99365	1	1
IESPGM.PTET51.1.102.39952	Early	1	1	0.9811	1	0.21115	0.2328	0.6902	0.706	0.88785	0.9289	0.9716	0.9613	0.98795	1	1
IESPGM.PTET51.1.102.44473	Early	1	1	0.9952	0.99625	0.13915	0.17065	0.20575	0.6327	0.888	0.9855	1	1	1	1	1
IESPGM.PTET51.1.102.45079	Early	0.9957	1	1	1	0.1575	0.1041	0.2976	0.53305	0.74335	0.93625	1	0.9942	1	1	0.9922
IESPGM.PTET51.1.102.45129	Early	0.99335	1	1	1	0.3025	0.2778	0.5236	0.78595	0.9723	1	0.98305	1	1	1	0.99195
IESPGM.PTET51.1.102.56135	Early	1	1	1	1	0.1812	0.1582	0.56195	0.66	0.82265	0.93775	0.99275	0.97845	0.9851	1	1
IESPGM.PTET51.1.102.61830	Early	0.99285	1	1	1	0.0682	0.12705	0.4092	0.7358	0.83045	0.96295	0.9163	0.9881	1	1	1
IESPGM.PTET51.1.102.66183	Early	1	0.9859	1	1	0.0728	0.18185	0.38795	0.67305	0.91155	0.95475	1	0.99155	0.9922	1	1
IESPGM.PTET51.1.102.74426	Early	1	0.9719	1	1	0.08605	0.197	0.30205	0.62145	0.8807	0.96585	0.95945	0.9672	1	1	1
IESPGM.PTET51.1.102.79650	Early	1	1	1	1	0.21845	0.20625	0.35605	0.68625	0.7081	0.89065	0.90375	0.9901	0.9863	1	0.9957
IESPGM.PTET51.1.102.80247	Early	1	1	0.97355	0.99475	0.0598000000000001	0.21935	0.3478	0.6285	0.6591	0.88235	0.9076	0.9765	0.9829	1	1
IESPGM.PTET51.1.102.82206	Early	1	1	1	0.991	0.3116	0.1334	0.3475	0.57145	0.85145	0.9205	0.93335	1	0.98665	1	1
IESPGM.PTET51.1.102.97473	Early	1	1	1	1	0.14665	0.14185	0.51455	0.64705	0.73515	0.88925	0.83555	1	0.98305	1	1
IESPGM.PTET51.1.103.100508	Early	1	0.9706	0.97565	1	0.20535	0.12915	0.58615	0.65355	0.9531	0.9811	1	0.9815	1	1	1
IESPGM.PTET51.1.103.101939	Early	1	1	1	1	0.1895	0.2972	0.68015	0.9186	0.9557	0.99365	1	1	1	1	1
IESPGM.PTET51.1.103.103072	Early	1	1	1	1	0.129	0.309	0.58395	0.8047	0.8869	0.9859	1	1	0.994	1	1
IESPGM.PTET51.1.103.103199	Early	1	1	1	1	0.1801	0.35265	0.5823	0.75025	0.8891	1	1	1	1	1	1
IESPGM.PTET51.1.103.108277	Early	1	0.99325	1	1	0.1748	0.24465	0.5128	0.7068	0.8721	0.9474	0.90715	0.9861	1	1	1
IESPGM.PTET51.1.103.112637	Early	1	0.974	1	1	0.11335	0.1321	0.3227	0.57145	0.7985	0.8912	0.93115	0.9524	1	1	1
IESPGM.PTET51.1.103.113234	Early	1	0.99485	0.9941	1	0.1685	0.155	0.3434	0.5982	0.73995	0.92805	0.8707	0.96795	0.99385	1	0.99485
IESPGM.PTET51.1.103.114084	Early	1	1	1	1	0.0569	0.14815	0.42175	0.58035	0.8049	0.9412	0.9589	1	0.98415	1	1
IESPGM.PTET51.1.103.116279	Early	1	1	0.9844	1	0.1218	0.29755	0.6342	0.85225	0.9007	0.9537	1	0.9851	1	1	1
IESPGM.PTET51.1.103.116500	Early	1	1	0.9855	1	0.2069	0.3038	0.4817	0.82675	0.8712	0.9853	0.9722	1	1	1	1
IESPGM.PTET51.1.103.118595	Early	1	1	0.9943	1	0.0737	0.3	0.4476	0.7863	0.8552	0.9577	0.9799	0.99165	1	1	1
IESPGM.PTET51.1.103.120005	Early	1	1	1	1	0.2171	0.31155	0.5532	0.80725	0.8404	0.94385	0.9623	0.99255	1	1	1
IESPGM.PTET51.1.103.121323	Early	1	1	1	1	0.15155	0.16615	0.33815	0.6925	0.77755	0.9807	0.889	1	1	1	1
IESPGM.PTET51.1.103.123425	Early	1	1	1	0.9889	0.3268	0.33995	0.43535	0.65645	0.85	0.9116	0.8745	0.9636	1	1	0.9918
IESPGM.PTET51.1.103.128125	Early	1	1	1	1	0.193	0.09165	0.35805	0.64235	0.83	0.94125	0.94495	0.99195	1	1	1
IESPGM.PTET51.1.103.159572	Early	1	1	1	1	0.1195	0.09465	0.29845	0.6904	0.76905	0.9459	0.95905	1	1	1	1
IESPGM.PTET51.1.103.163078	Early	0.9939	1	0.99275	1	0.04955	0.1495	0.3981	0.72595	0.85995	0.9294	1	1	1	1	1
IESPGM.PTET51.1.103.16530	Early	1	1	1	1	0.2143	0.25175	0.4865	0.90525	0.9661	0.9922	1	1	1	1	1
IESPGM.PTET51.1.103.167479	Early	1	1	1	0.9896	0.2011	0.21325	0.76575	0.93325	0.9647	1	1	1	1	0.98075	0.9912
IESPGM.PTET51.1.103.17096	Early	1	1	0.9355	1	0.1749	0.367	0.70835	0.80625	0.95255	0.97095	1	0.9841	1	1	0.9885
IESPGM.PTET51.1.103.172393	Early	1	1	0.9855	1	0.3005	0.28125	0.67265	0.8448	0.9	0.99285	1	1	1	0.9778	0.9912
IESPGM.PTET51.1.103.172504	Early	1	1	1	0.99295	0.1905	0.21845	0.6463	0.93435	0.9804	1	1	1	1	0.9898	1
IESPGM.PTET51.1.103.173932	Early	1	1	1	1	0.2099	0.1649	0.6014	0.79285	0.98275	1	1	1	1	1	1
IESPGM.PTET51.1.103.178225	Early	0.9904	1	1	1	0.13085	0.2858	0.2787	0.50605	0.81315	0.93135	0.9483	0.99075	1	1	1
IESPGM.PTET51.1.103.18054	Early	1	0.99155	0.9934	1	0.0202	0.20285	0.423	0.718	0.82895	0.934	0.95615	0.98	0.9846	1	1
IESPGM.PTET51.1.103.183611	Early	1	1	1	1	0.02745	0.24925	0.6219	0.72725	0.96875	0.9889	1	0.9924	1	1	1
IESPGM.PTET51.1.103.187862	Early	1	1	0.99375	1	0.15615	0.10555	0.3459	0.6057	0.7584	0.9405	0.93	1	1	1	1
IESPGM.PTET51.1.103.193358	Early	1	1	1	1	0	0.1702	0.6751	0.795	0.85025	0.9851	0.93865	1	1	1	1
IESPGM.PTET51.1.103.195887	Early	1	0.99305	1	0.99475	0.19785	0.25055	0.6765	0.7857	0.96395	0.98245	1	1	1	1	1
IESPGM.PTET51.1.103.197273	Early	1	1	1	1	0.16385	0.08205	0.21325	0.70465	0.9284	0.9615	0.9069	0.99425	1	1	1
IESPGM.PTET51.1.103.201261	Early	1	1	0.9821	1	0.0975999999999999	0.3077	0.74485	0.8757	0.94265	0.9552	1	1	1	1	1
IESPGM.PTET51.1.103.204287	Early	1	1	1	1	0.087	0.10595	0.3454	0.7092	0.8897	0.972	1	1	1	1	1
IESPGM.PTET51.1.103.20717	Early	1	0.9909	1	1	0.205	0.17195	0.3752	0.39185	0.8562	0.9272	0.94995	0.9726	0.987	1	0.99475
IESPGM.PTET51.1.103.207876	Early	1	1	1	1	0.0757	0.34565	0.59435	0.8903	0.97085	0.98665	1	0.9848	1	1	1
IESPGM.PTET51.1.103.215671	Early	1	1	1	1	0.1248	0.208	0.5974	0.6078	0.60555	0.8507	0.8007	0.99255	0.987	1	1
IESPGM.PTET51.1.103.216897	Early	1	1	1	1	0.09455	0.1926	0.4054	0.63675	0.8853	0.95905	0.9487	0.99295	1	1	0.98525
IESPGM.PTET51.1.103.222936	Early	0.9728	1	0.99315	0.9878	0.0619000000000001	0.18275	0.4095	0.6349	0.6855	0.9334	0.8755	0.9923	0.97725	1	1
IESPGM.PTET51.1.103.223030	Early	1	1	0.99325	1	0.2327	0.16195	0.32465	0.55425	0.81575	0.86335	0.87395	0.9836	0.99365	1	0.99485
IESPGM.PTET51.1.103.233063	Early	1	1	1	1	0.07735	0.2207	0.32515	0.64585	0.9872	0.9091	1	1	1	1	1
IESPGM.PTET51.1.103.23349	Early	1	1	1	1	0.28535	0.3704	0.6085	0.9016	0.9934	1	1	1	0.99315	1	1
IESPGM.PTET51.1.103.250509	Early	1	1	1	1	0.1458	0.34615	0.67265	0.9427	0.9947	1	1	0.9872	0.99315	1	1
IESPGM.PTET51.1.103.254791	Early	1	1	0.98835	0.99155	0.15265	0.3508	0.7222	0.80355	0.96705	0.97965	1	0.9923	1	1	1
IESPGM.PTET51.1.103.260681	Early	1	1	1	1	0.193	0.28045	0.6716	0.79405	0.88745	0.99105	0.95205	0.99265	1	1	1
IESPGM.PTET51.1.103.264667	Early	0.9859	1	1	1	0.1222	0.2043	0.6107	0.7931	0.908	0.99105	1	0.99385	1	1	1
IESPGM.PTET51.1.103.269679	Early	1	1	1	1	0	0.29575	0.80025	0.93735	0.992	0.99265	0.99305	0.9914	0.99315	1	1
IESPGM.PTET51.1.103.270288	Early	1	1	1	1	0.03775	0.12745	0.34915	0.54155	0.8649	0.90715	0.9749	0.9839	1	0.9898	1
IESPGM.PTET51.1.103.270517	Early	1	0.9494	0.9846	0.9873	0.2078	0.1282	0.3748	0.6391	0.84675	0.9303	1	1	0.96355	1	0.99555
IESPGM.PTET51.1.103.270824	Early	1	1	0.99315	0.9935	0.2281	0.3002	0.49795	0.83745	0.91535	0.96185	1	1	1	1	0.9955
IESPGM.PTET51.1.103.276221	Early	1	1	0.99195	0.9863	0.2143	0.41	0.66745	0.82205	0.878	0.9656	1	1	0.99	1	1
IESPGM.PTET51.1.103.278770	Early	1	1	1	0.9827	0.2733	0.2543	0.5439	0.8714	0.94835	0.99295	0.9949	1	1	1	1
IESPGM.PTET51.1.103.279083	Early	0.99485	1	1	1	0.3008	0.3668	0.6039	0.8696	0.98635	1	1	1	1	1	1
IESPGM.PTET51.1.103.279421	Early	1	1	1	1	0.21435	0.18485	0.475	0.7634	0.85325	0.9722	1	0.98095	1	1	0.9949
IESPGM.PTET51.1.103.291086	Early	1	0.9853	1	1	0.26785	0.3285	0.503	0.8564	0.794	0.94775	0.9722	0.99255	1	1	1
IESPGM.PTET51.1.103.29886	Early	1	1	0.99325	1	0.14375	0.18615	0.60285	0.8906	0.87485	0.97565	1	1	1	1	1
IESPGM.PTET51.1.103.38817	Early	1	1	1	1	0.2248	0.24775	0.34525	0.6957	0.95835	0.9526	1	0.9868	1	1	1
IESPGM.PTET51.1.103.40466	Early	1	1	1	1	0.1544	0.2946	0.7659	0.7778	0.99075	1	0.99205	1	1	1	1
IESPGM.PTET51.1.103.45100	Early	1	1	0.987	1	0.27355	0.3664	0.6324	0.90555	0.9952	1	1	0.9875	1	1	1
IESPGM.PTET51.1.103.55400	Early	1	0.99455	1	1	0.20845	0.2501	0.51675	0.80815	0.8907	0.971	0.94	0.9914	1	1	1
IESPGM.PTET51.1.103.59950	Early	0.99485	1	0.9773	1	0.0782499999999999	0.1956	0.5098	0.7948	1	0.9923	1	1	1	1	1
IESPGM.PTET51.1.103.62398	Early	1	0.99315	1	1	0.1189	0.11145	0.51915	0.7922	0.868	0.9844	0.98875	0.9808	1	1	1
IESPGM.PTET51.1.103.66063	Early	1	1	0.9882	1	0.1529	0.11835	0.1566	0.62855	0.7536	0.9846	1	1	1	1	1
IESPGM.PTET51.1.103.72545	Early	0.9948	1	1	1	0.1948	0.22545	0.36245	0.6723	0.7118	0.835	0.86475	0.987	0.97715	1	1
IESPGM.PTET51.1.103.77868	Early	1	0.98025	0.9934	1	0.18525	0.197	0.4066	0.6475	0.9474	0.95805	0.9924	0.97915	1	1	1
IESPGM.PTET51.1.103.77924	Early	1	1	0.9939	1	0.2355	0.3606	0.7107	0.83535	0.96885	0.9889	1	0.9506	1	1	1
IESPGM.PTET51.1.103.79156	Early	1	1	1	1	0.17455	0.1356	0.2706	0.6872	0.87685	0.92495	1	0.97715	0.99315	0.9909	1
IESPGM.PTET51.1.103.79890	Early	1	1	1	0.9808	0.17205	0.4058	0.54595	0.919	0.9001	1	1	0.97965	1	1	1
IESPGM.PTET51.1.103.83449	Early	1	1	0.9934	1	0.13085	0.09205	0.298	0.6173	0.73415	0.9621	0.9732	0.9914	0.99255	1	1
IESPGM.PTET51.1.103.86661	Early	1	1	0.99325	1	0.0682	0.05645	0.4092	0.50125	0.86635	0.94725	1	0.9918	1	1	1
IESPGM.PTET51.1.103.88277	Early	1	1	0.989	0.99455	0.1888	0.245	0.43115	0.7833	0.87685	0.96555	0.987	1	0.99315	1	0.98705
IESPGM.PTET51.1.103.90436	Early	1	1	0.9818	0.9897	0.11085	0.17065	0.64275	0.70525	0.841	0.96945	1	1	0.98115	1	1
IESPGM.PTET51.1.103.90464	Early	1	1	0.99195	0.9794	0.11295	0.20725	0.62415	0.7833	0.9839	0.97565	1	1	1	1	0.98935
IESPGM.PTET51.1.103.91061	Early	1	1	0.9818	1	0.14645	0.09015	0.4356	0.5194	0.9099	0.99125	0.9841	1	1	1	1
IESPGM.PTET51.1.103.91705	Early	1	1	1	1	0.0984	0.1247	0.3023	0.5802	0.7606	0.9688	0.98495	0.98185	1	1	1
IESPGM.PTET51.1.104.111004	Early	1	1	0.98215	1	0.13085	0.0875999999999999	0.32555	0.46015	0.8891	0.97415	0.8527	0.99	1	1	1
IESPGM.PTET51.1.104.111126	Early	1	0.9885	0.98215	1	0.1408	0.11465	0.4697	0.5353	0.86275	0.9023	0.873	1	0.9939	1	1
IESPGM.PTET51.1.104.113843	Early	1	1	1	1	0.09	0.1918	0.67425	0.5715	0.7416	0.9411	0.86795	1	0.99255	1	0.9839
IESPGM.PTET51.1.104.116927	Early	0.9918	1	1	1	0.1972	0.2025	0.4801	0.61325	0.63335	0.77855	0.77935	0.94635	0.92915	1	1
IESPGM.PTET51.1.104.122499	Early	1	1	1	0.9853	0.127	0.3267	0.54095	0.7458	0.95035	1	1	1	0.9882	0.9818	0.9959
IESPGM.PTET51.1.104.124542	Early	1	1	1	1	0	0.1459	0.4521	0.7155	0.86745	0.86235	0.83885	1	0.9935	0.9923	1
IESPGM.PTET51.1.104.124990	Early	1	1	1	1	0.2536	0.3277	0.43605	0.5398	0.75345	0.8406	0.7241	0.97745	0.9706	0.9836	1
IESPGM.PTET51.1.104.129007	Early	1	0.98215	0.9811	0.99195	0.2245	0.21765	0.70715	0.82115	0.9545	1	1	0.99	1	1	0.9875
IESPGM.PTET51.1.104.134952	Early	1	0.99445	1	1	0.11555	0.1972	0.4285	0.6731	0.8549	0.9683	0.9648	0.99055	1	1	1
IESPGM.PTET51.1.104.141702	Early	1	0.9923	1	0.9859	0.08245	0.2806	0.5242	0.6844	0.6869	0.9163	0.95	0.9923	0.9949	1	0.99315
IESPGM.PTET51.1.104.145880	Early	1	0.9714	0.9943	0.9787	0.0682499999999999	0.1495	0.59125	0.6395	0.77155	0.90955	0.93005	0.9936	0.9649	1	1
IESPGM.PTET51.1.104.149292	Early	1	1	1	1	0.1569	0.24255	0.55555	0.67165	0.8385	0.94855	1	0.97935	1	1	0.99535
IESPGM.PTET51.1.104.14996	Early	1	1	0.99325	1	0.23365	0.37335	0.5486	0.8596	0.9644	0.9821	0.94775	1	1	1	1
IESPGM.PTET51.1.104.152751	Early	1	0.99325	0.987	1	0.1426	0.13465	0.30285	0.67235	0.86975	0.9714	0.919	1	1	1	1
IESPGM.PTET51.1.104.153248	Early	1	1	1	1	0.11355	0.2626	0.56445	0.69145	0.88015	0.97205	0.97905	0.9895	1	1	1
IESPGM.PTET51.1.104.154069	Early	1	1	0.9944	1	0.2002	0.17025	0.36925	0.6903	0.89055	0.95035	0.9016	0.9756	1	1	1
IESPGM.PTET51.1.104.154894	Early	1	1	1	1	0.10055	0.2737	0.64405	0.613	0.85885	0.98685	0.88135	0.9882	1	1	1
IESPGM.PTET51.1.104.155283	Early	1	1	0.9802	1	0.08525	0.24055	0.5569	0.8064	0.96435	0.9865	1	1	1	1	1
IESPGM.PTET51.1.104.165223	Early	1	1	1	1	0.1277	0.27885	0.803	0.854	0.9301	0.9804	1	1	0.99195	1	1
IESPGM.PTET51.1.104.166834	Early	1	1	1	1	0.0937	0.1965	0.5394	0.77065	0.915	0.9846	0.97965	1	0.98415	1	1
IESPGM.PTET51.1.104.176662	Early	1	1	0.9846	1	0.18895	0.354	0.6291	0.86765	0.9694	0.9768	1	1	1	1	1
IESPGM.PTET51.1.104.179286	Early	1	1	0.9897	1	0.2232	0.25115	0.73735	0.84865	0.97475	0.97785	1	1	0.99385	1	1
IESPGM.PTET51.1.104.180826	Early	1	1	1	1	0.16445	0.15055	0.3422	0.588	0.8228	0.94665	0.95625	0.9811	0.9904	1	1
IESPGM.PTET51.1.104.184552	Early	1	1	1	1	0.10685	0.33055	0.66245	0.6748	0.9291	0.9466	1	0.99075	1	1	1
IESPGM.PTET51.1.104.193518	Early	1	1	0.99105	0.99205	0.15235	0.1895	0.4128	0.6991	0.86425	0.98275	1	1	1	1	1
IESPGM.PTET51.1.104.197807	Early	1	1	1	1	0.0446	0.0606	0.36025	0.70615	0.9303	0.99295	1	0.99075	0.99275	1	1
IESPGM.PTET51.1.104.205028	Early	1	1	1	1	0.2031	0.3005	0.6618	0.879	0.98165	1	1	0.99155	1	1	1
IESPGM.PTET51.1.104.212611	Early	1	1	0.9954	1	0.2668	0.2347	0.4877	0.72395	0.8782	0.9531	0.99335	0.9935	0.9947	1	0.9922
IESPGM.PTET51.1.104.213754	Early	1	1	0.9867	0.9863	0.26135	0.43285	0.47615	0.7704	0.9408	0.9749	1	1	0.994	1	0.99545
IESPGM.PTET51.1.104.218554	Early	1	1	1	1	0.29165	0.2713	0.36545	0.62485	0.78715	0.9566	0.93535	1	0.9855	0.9878	1
IESPGM.PTET51.1.104.222022	Early	1	1	1	0.9901	0.11805	0.2406	0.4787	0.577	0.8378	0.9396	0.97765	0.9669	0.9877	1	1
IESPGM.PTET51.1.104.225237	Early	1	1	1	1	0.15575	0.1587	0.5763	0.75365	0.87475	0.96235	0.98735	0.99305	0.99265	1	1
IESPGM.PTET51.1.104.228642	Early	1	1	1	1	0.2329	0.22795	0.6434	0.72015	0.88295	0.901	0.96055	0.99335	0.99285	1	0.9952
IESPGM.PTET51.1.104.230676	Early	1	1	0.99365	0.99305	0.1941	0.2725	0.43115	0.64615	0.6807	0.95585	0.9942	0.9749	1	1	0.9942
IESPGM.PTET51.1.104.232728	Early	1	1	0.9774	1	0.1782	0.3068	0.7095	0.8974	0.93025	1	0.966	1	1	1	1
IESPGM.PTET51.1.104.236916	Early	1	0.9149	0.98835	0.9905	0.1207	0.12955	0.44305	0.6042	0.84005	0.8889	0.99365	1	0.974	0.98485	1
IESPGM.PTET51.1.104.236957	Early	1	1	1	1	0.05985	0.1086	0.3994	0.69645	0.8648	0.99155	1	1	1	1	1
IESPGM.PTET51.1.104.238394	Early	1	1	0.9934	0.9939	0.1522	0.2082	0.3583	0.6622	0.78365	0.94765	0.93005	1	1	1	0.9942
IESPGM.PTET51.1.104.239394	Early	1	1	0.9836	1	0.1111	0.10205	0.7487	0.8257	0.875	0.9846	0.9671	1	1	1	1
IESPGM.PTET51.1.104.24121	Early	1	1	1	0.99315	0.25965	0.3061	0.4671	0.6948	0.8899	0.9814	0.95405	1	0.9836	0.99155	1
IESPGM.PTET51.1.104.245002	Early	1	1	0.98435	1	0.14925	0.1557	0.46565	0.729	0.7907	0.9357	0.89395	0.9792	0.99375	1	1
IESPGM.PTET51.1.104.247520	Early	1	1	1	1	0.30695	0.3262	0.67785	0.80795	0.9744	0.9922	1	1	1	1	1
IESPGM.PTET51.1.104.24996	Early	1	0.9821	1	0.9947	0.23155	0.22415	0.533	0.75195	0.83995	0.94785	1	0.98865	1	1	1
IESPGM.PTET51.1.104.250168	Early	1	1	0.9943	0.9858	0.0457	0.12535	0.33475	0.5205	0.82795	0.9427	0.9064	1	0.9942	1	0.99545
IESPGM.PTET51.1.104.252053	Early	1	1	0.9923	0.9851	0.25795	0.36805	0.6608	0.76775	0.9855	0.9909	0.98765	1	1	1	1
IESPGM.PTET51.1.104.252633	Early	1	1	1	1	0.1538	0.0748	0.35475	0.50165	0.8539	0.94125	1	0.9923	1	1	1
IESPGM.PTET51.1.104.257520	Early	1	1	0.99315	1	0.1241	0.22195	0.4534	0.58915	0.85135	0.98935	0.9825	0.9889	1	1	1
IESPGM.PTET51.1.104.257653	Early	1	1	0.9922	1	0.16705	0.24415	0.68795	0.8571	0.955	1	0.96875	0.99195	1	1	1
IESPGM.PTET51.1.104.259624	Early	1	1	1	1	0.199	0.2415	0.7615	0.9405	0.93265	1	1	1	1	1	0.9906
IESPGM.PTET51.1.104.260886	Early	1	1	1	1	0.173	0.13	0.4863	0.7402	0.82885	0.98665	0.96675	0.99365	0.98245	1	0.9956
IESPGM.PTET51.1.104.263828	Early	1	1	0.9857	1	0.26805	0.1635	0.44355	0.68875	0.7295	0.96355	0.9815	0.99075	0.9768	1	1
IESPGM.PTET51.1.104.265768	Early	1	0.9856	1	1	0.14645	0.16005	0.63965	0.6064	0.86915	0.85445	0.93305	1	0.9941	1	1
IESPGM.PTET51.1.104.267340	Early	1	0.99445	1	1	0.23515	0.3311	0.49455	0.71685	0.8978	0.9685	0.9872	0.9863	1	0.99205	1
IESPGM.PTET51.1.104.268551	Early	1	1	1	0.99255	0.1	0.1618	0.64665	0.6776	0.96205	0.9622	0.94285	1	1	1	1
IESPGM.PTET51.1.104.269039	Early	0.99275	1	1	0.9924	0.33055	0.37625	0.5278	0.766	0.7573	0.9151	0.8891	0.95805	0.96355	1	1
IESPGM.PTET51.1.104.270122	Early	1	1	0.97715	1	0.1722	0.23565	0.6413	0.80385	0.9437	0.9754	1	1	1	1	1
IESPGM.PTET51.1.104.273845	Early	1	1	1	1	0.177	0.28315	0.40795	0.6782	0.8846	0.9914	0.9863	1	1	1	1
IESPGM.PTET51.1.104.274147	Early	1	1	1	0.99265	0.126	0.17835	0.54525	0.75635	0.9344	0.9872	0.99285	0.97715	1	1	1
IESPGM.PTET51.1.104.275534	Early	1	1	1	1	0.0547	0.1495	0.5529	0.6471	0.80275	0.9385	0.9634	1	0.9857	1	1
IESPGM.PTET51.1.104.277505	Early	1	1	0.99195	0.9878	0.1252	0.2537	0.68935	0.58445	0.9121	0.97815	0.9941	0.99165	1	1	1
IESPGM.PTET51.1.104.279266	Early	1	1	1	1	0.2039	0.20835	0.51825	0.61715	0.8884	0.96875	0.9818	0.9918	0.99385	1	1
IESPGM.PTET51.1.104.285556	Early	1	1	1	1	0.24245	0.22075	0.6466	0.7477	0.99165	1	0.9804	1	1	1	1
IESPGM.PTET51.1.104.298391	Early	1	1	0.994	1	0.0687	0.10075	0.37285	0.5315	0.7292	0.9336	0.92955	1	0.99375	1	0.99375
IESPGM.PTET51.1.104.37415	Early	0.99325	1	0.9875	1	0.0810999999999999	0.21795	0.2799	0.635	0.7539	0.91065	0.94835	0.98935	0.9821	1	1
IESPGM.PTET51.1.104.42620	Early	1	0.99265	1	1	0.1801	0.25225	0.4541	0.72465	0.91825	0.97715	0.97465	1	0.9946	1	1
IESPGM.PTET51.1.104.52876	Early	1	1	1	1	0.1835	0.1909	0.47105	0.78915	0.75	0.95735	0.9708	0.9768	1	1	1
IESPGM.PTET51.1.104.70032	Early	1	0.9889	1	0.9947	0.2017	0.1679	0.37515	0.61825	0.66595	0.9632	0.8979	0.99075	0.9939	1	1
IESPGM.PTET51.1.104.72273	Early	1	1	0.9733	1	0.15645	0.30405	0.50705	0.8143	0.8862	1	1	0.9846	1	0.9909	1
IESPGM.PTET51.1.104.84529	Early	1	1	0.9923	1	0.1591	0.1938	0.45405	0.63445	0.85055	0.9174	0.98235	1	0.988	0.9875	1
IESPGM.PTET51.1.104.88898	Early	1	1	1	0.98315	0.1624	0.10835	0.4167	0.65395	0.8171	0.9914	0.97275	1	1	1	1
IESPGM.PTET51.1.104.90642	Early	1	1	0.9682	1	0.18435	0.2244	0.77905	0.94855	0.9823	0.9904	1	1	0.9923	1	1
IESPGM.PTET51.1.104.91344	Early	0.9956	1	0.9863	1	0.26105	0.27905	0.4873	0.78795	0.8121	0.931	0.9091	0.98735	0.97765	1	1
IESPGM.PTET51.1.105.101655	Early	0.9947	1	1	1	0.01795	0.158	0.37525	0.61635	0.64525	0.9656	0.98665	0.9896	1	0.98935	1
IESPGM.PTET51.1.105.107557	Early	1	1	1	1	0.2154	0.18915	0.4598	0.79075	0.915	0.98215	0.9792	1	1	1	1
IESPGM.PTET51.1.105.113529	Early	0.9942	1	1	1	0.1575	0.198	0.35565	0.5536	0.7492	0.95615	0.99315	0.9934	1	1	1
IESPGM.PTET51.1.105.117956	Early	1	1	0.9918	1	0.0724	0.17525	0.5234	0.86235	0.9786	0.9914	1	1	1	0.99105	1
IESPGM.PTET51.1.105.120468	Early	1	1	0.9947	0.989	0.22005	0.23975	0.56535	0.8139	0.92775	0.9768	1	0.98945	0.98765	1	1
IESPGM.PTET51.1.105.121529	Early	1	0.98215	1	1	0.24305	0.3286	0.58555	0.9396	0.91265	0.9566	0.97435	1	0.9923	1	0.99115
IESPGM.PTET51.1.105.126289	Early	1	1	0.994	1	0.2002	0.2464	0.52285	0.8336	0.87265	0.9865	0.9754	0.99455	1	1	1
IESPGM.PTET51.1.105.130422	Early	1	1	1	1	0.26425	0.25265	0.36175	0.6619	0.7337	0.93625	1	1	0.99125	1	1
IESPGM.PTET51.1.105.133840	Early	1	0.9856	1	1	0.11785	0.23635	0.43975	0.6996	0.7893	0.91955	0.97295	1	1	0.9923	1
IESPGM.PTET51.1.105.135087	Early	1	0.99315	0.9939	0.99535	0.26265	0.29575	0.66735	0.88425	0.9266	1	0.9815	0.99455	1	1	0.99495
IESPGM.PTET51.1.105.138653	Early	1	1	1	1	0.176	0.39355	0.62565	0.67895	0.86265	0.95335	0.9769	1	0.99255	1	1
IESPGM.PTET51.1.105.144137	Early	1	1	0.9949	0.99335	0.07345	0.0408500000000001	0.2862	0.64375	0.87735	0.94	0.939	0.97305	0.98765	1	1
IESPGM.PTET51.1.105.144145	Early	1	1	1	0.9867	0.07955	0.0646	0.43815	0.758	0.92015	0.9685	1	1	1	1	1
IESPGM.PTET51.1.105.145659	Early	1	1	1	1	0.10195	0.26655	0.39095	0.6508	0.8781	0.98115	0.8906	1	0.9923	1	1
IESPGM.PTET51.1.105.147205	Early	1	1	1	1	0.17145	0.2972	0.6694	0.7963	0.90425	0.9405	0.9943	1	1	1	1
IESPGM.PTET51.1.105.147494	Early	1	1	1	1	0.2843	0.20965	0.4692	0.8373	0.76955	0.92645	0.90785	1	1	1	1
IESPGM.PTET51.1.105.150865	Early	1	1	0.99205	1	0.1494	0.23935	0.3148	0.69575	0.84105	0.99275	0.96175	0.98865	1	1	1
IESPGM.PTET51.1.105.153278	Early	1	1	1	1	0.05665	0.2211	0.38985	0.6933	0.67065	0.9063	0.9326	0.9882	1	1	1
IESPGM.PTET51.1.105.173226	Early	1	1	1	1	0.08815	0.3156	0.69765	0.8514	0.96155	0.9922	1	1	1	1	1
IESPGM.PTET51.1.105.175934	Early	1	1	1	0.9855	0.13075	0.0691999999999999	0.43685	0.6889	0.9301	0.9804	1	0.99075	1	1	1
IESPGM.PTET51.1.105.17651	Early	1	1	0.99105	1	0.1629	0.38415	0.7162	0.8406	0.9478	0.9851	1	1	1	0.98415	1
IESPGM.PTET51.1.105.177759	Early	1	1	1	0.92015	0.08	0.24765	0.5334	0.73275	0.7824	0.8388	1	0.9405	0.94	0.96645	0.9754
IESPGM.PTET51.1.105.182053	Early	1	1	1	1	0.12785	0.2376	0.54985	0.6841	0.9118	0.98335	0.9631	0.9923	0.99455	1	0.9952
IESPGM.PTET51.1.105.194559	Early	1	1	1	0.9922	0.13795	0.31075	0.77015	0.876	0.9668	1	0.9844	1	1	1	1
IESPGM.PTET51.1.105.198877	Early	1	1	1	1	0.0851500000000001	0.13115	0.35965	0.60915	0.8609	0.97175	1	0.9924	1	1	1
IESPGM.PTET51.1.105.199851	Early	1	1	1	1	0.41785	0.2894	0.4874	0.8657	0.8933	0.9839	1	1	0.97815	1	1
IESPGM.PTET51.1.105.201113	Early	1	1	1	0.9909	0.17175	0.34345	0.59545	0.76585	0.9341	0.9918	0.9815	1	1	1	1
IESPGM.PTET51.1.105.202491	Early	1	1	1	1	0.16935	0.31935	0.5443	0.81635	0.8545	1	1	1	1	1	1
IESPGM.PTET51.1.105.21054	Early	1	1	1	1	0.1401	0.182	0.41685	0.6616	0.69505	0.894	0.86205	0.97785	1	1	1
IESPGM.PTET51.1.105.21477	Early	1	0.99315	1	1	0.2022	0.32825	0.62085	0.74195	0.83105	0.918	0.9165	0.99165	1	1	1
IESPGM.PTET51.1.105.221120	Early	1	1	0.9943	0.99455	0.2261	0.4484	0.6544	0.71955	0.9405	0.9768	1	1	1	1	0.9919
IESPGM.PTET51.1.105.230230	Early	1	1	0.9934	1	0.1909	0.1769	0.31945	0.66495	0.87055	0.9458	0.89885	0.99195	1	1	1
IESPGM.PTET51.1.105.231674	Early	1	1	1	1	0.28575	0.30005	0.66765	0.86125	0.9733	1	1	0.9778	1	1	0.99535
IESPGM.PTET51.1.105.233130	Early	1	1	1	1	0.1845	0.2336	0.67705	0.7292	0.92515	0.99155	0.97275	0.99255	1	1	1
IESPGM.PTET51.1.105.233482	Early	1	1	1	1	0.2318	0.2586	0.3158	0.48085	0.7842	0.89215	0.9115	0.9721	0.9941	1	1
IESPGM.PTET51.1.105.235014	Early	1	1	0.99335	1	0.02305	0.0840000000000001	0.38205	0.728	0.86905	0.9923	0.9945	1	1	1	1
IESPGM.PTET51.1.105.23809	Early	1	1	0.9844	1	0.1432	0.3376	0.76275	0.8779	0.96915	1	1	1	1	1	0.99275
IESPGM.PTET51.1.105.239868	Early	0.99125	1	0.98465	1	0.1936	0.16965	0.475	0.72655	0.9325	0.99205	0.9859	1	1	1	1
IESPGM.PTET51.1.105.241400	Early	1	1	0.9873	1	0.2144	0.31405	0.39335	0.50375	0.75125	0.8114	0.859	0.96235	0.96355	1	1
IESPGM.PTET51.1.105.241702	Early	1	0.9902	1	0.9908	0.22415	0.14925	0.3002	0.53725	0.8282	0.85195	1	1	1	0.9863	0.996
IESPGM.PTET51.1.105.241752	Early	1	0.96875	0.99325	1	0.1607	0.20725	0.48715	0.621	0.91845	0.9923	0.99325	1	1	1	1
IESPGM.PTET51.1.105.243805	Early	1	1	1	0.9851	0.26925	0.13625	0.4239	0.71225	0.82045	0.9857	0.989	0.9855	1	0.9878	1
IESPGM.PTET51.1.105.244693	Early	1	1	1	1	0.18415	0.1321	0.28945	0.6142	0.75955	0.83355	0.81485	0.9877	1	1	0.9915
IESPGM.PTET51.1.105.248249	Early	1	1	0.99125	1	0.11895	0.25635	0.54775	0.6803	0.8255	0.88325	0.94875	1	0.9836	1	1
IESPGM.PTET51.1.105.252976	Early	1	1	1	1	0.18895	0.0939000000000001	0.6963	0.8337	0.95325	0.99295	1	0.9948	1	1	1
IESPGM.PTET51.1.105.25441	Early	0.98385	1	0.9677	1	0.24745	0.2361	0.55125	0.8318	0.81295	0.94495	0.96825	0.9881	0.987	1	1
IESPGM.PTET51.1.105.25820	Early	1	0.9898	1	1	0.1819	0.20695	0.6248	0.697	0.9179	1	1	1	1	1	1
IESPGM.PTET51.1.105.258487	Early	0.9753	1	1	1	0.12635	0.23835	0.49545	0.7684	0.86465	0.99255	0.9672	1	0.9867	1	1
IESPGM.PTET51.1.105.26719	Early	1	1	0.9922	1	0.10005	0.22805	0.468	0.72235	0.80045	0.93705	0.8769	0.9848	1	1	1
IESPGM.PTET51.1.105.27027	Early	1	1	0.98385	1	0.12085	0.1594	0.3511	0.66345	0.84795	0.96405	0.90945	0.9943	1	1	1
IESPGM.PTET51.1.105.283046	Early	1	1	1	0.9944	0.2752	0.0625	0.2915	0.6027	0.74075	0.92345	0.90255	1	0.9922	1	1
IESPGM.PTET51.1.105.285212	Early	1	1	0.9787	0.9767	0.19055	0.17585	0.35185	0.5326	0.79905	0.8933	0.98305	0.96	1	1	0.9939
IESPGM.PTET51.1.105.289674	Early	1	1	1	1	0.2003	0.29975	0.7432	0.7108	0.9898	0.98115	1	0.968	1	1	1
IESPGM.PTET51.1.105.291025	Early	1	1	1	1	0.19805	0.13455	0.5	0.83245	0.9541	0.9556	1	1	1	0.9889	1
IESPGM.PTET51.1.105.298444	Early	0.9945	1	1	0.9941	0.048	0.15395	0.47845	0.69245	0.9001	0.95405	1	1	1	1	1
IESPGM.PTET51.1.105.302082	Early	1	1	0.99265	1	0.1569	0.17585	0.41745	0.7673	0.84595	0.98485	1	1	0.987	1	0.9892
IESPGM.PTET51.1.105.33226	Early	1	1	1	1	0.10455	0.2982	0.63675	0.76095	0.8377	0.9804	0.95715	1	1	1	1
IESPGM.PTET51.1.105.38981	Early	1	1	1	0.9923	0.07295	0.15145	0.45165	0.79215	0.82865	0.9659	1	1	1	1	1
IESPGM.PTET51.1.105.39279	Early	1	1	0.99125	1	0.22475	0.2771	0.646	0.80725	0.8063	0.9722	1	1	1	1	1
IESPGM.PTET51.1.105.42014	Early	0.9951	1	0.99265	0.9861	0.21365	0.2773	0.586	0.7647	0.87535	0.96355	1	1	0.9918	1	1
IESPGM.PTET51.1.105.46345	Early	1	1	0.9863	1	0.2434	0.36595	0.57935	0.73605	0.9799	0.9579	1	1	1	0.99	0.9957
IESPGM.PTET51.1.105.46679	Early	1	1	0.9859	1	0.2667	0.2843	0.6112	0.7636	0.84515	0.96935	1	1	1	0.9804	0.99575
IESPGM.PTET51.1.105.48085	Early	1	1	1	1	0.24875	0.2056	0.48585	0.572	0.79165	0.96735	0.96925	0.99195	1	1	1
IESPGM.PTET51.1.105.48353	Early	1	1	0.99315	0.9941	0.1165	0.3471	0.5246	0.7604	0.89445	0.97785	0.96775	1	1	1	1
IESPGM.PTET51.1.105.51215	Early	0.9815	0.9801	0.9934	1	0.0602	0.1681	0.3946	0.7419	0.8155	0.9242	0.98235	0.99335	1	1	1
IESPGM.PTET51.1.105.51869	Early	1	0.9783	1	1	0.13345	0.1785	0.47445	0.62995	0.8709	0.92105	0.86275	1	0.9737	1	0.9888
IESPGM.PTET51.1.105.52985	Early	0.9944	0.9732	0.99425	1	0.15625	0.31525	0.72025	0.90555	0.9556	1	0.97645	0.99295	1	1	1
IESPGM.PTET51.1.105.53800	Early	1	1	1	1	0.25865	0.26915	0.6061	0.8435	0.9085	0.9699	0.9659	0.99365	1	1	1
IESPGM.PTET51.1.105.5692	Early	1	1	0.9767	1	0.16095	0.3395	0.4431	0.87855	0.89535	0.98935	0.98915	0.9853	1	1	1
IESPGM.PTET51.1.105.57232	Early	1	1	1	1	0.15085	0.2368	0.59765	0.75545	0.9382	1	1	0.9898	1	1	1
IESPGM.PTET51.1.105.57896	Early	1	1	1	0.99295	0.0757	0.1856	0.48265	0.48255	0.85395	0.9206	0.95515	1	1	1	0.9901
IESPGM.PTET51.1.105.64737	Early	1	1	0.9901	1	0.13595	0.1808	0.4593	0.7645	0.87255	0.99315	0.962	1	1	1	1
IESPGM.PTET51.1.105.65226	Early	0.9867	1	1	1	0.3186	0.1961	0.64675	0.7522	0.9222	0.98	0.9524	0.99285	0.9861	1	1
IESPGM.PTET51.1.105.66601	Early	1	1	1	0.9846	0.19185	0.1222	0.2772	0.63045	0.69345	0.88295	0.8968	0.9909	1	1	1
IESPGM.PTET51.1.105.67615	Early	1	1	0.99275	1	0.03745	0.0971500000000001	0.24365	0.5635	0.7841	0.9844	1	1	1	1	1
IESPGM.PTET51.1.105.70567	Early	1	1	0.99335	1	0.24765	0.2846	0.66385	0.8235	0.9725	0.9799	0.9564	1	1	0.99285	1
IESPGM.PTET51.1.105.73323	Early	1	1	0.99295	1	0.176	0.241	0.65355	0.7553	0.948	0.9722	0.93285	1	1	1	1
IESPGM.PTET51.1.105.73490	Early	1	1	0.99195	1	0.199	0.20675	0.5247	0.70225	0.9212	0.9396	1	1	1	1	1
IESPGM.PTET51.1.105.75641	Early	1	0.99565	0.9797	0.99495	0.1994	0.21635	0.2811	0.6973	0.82225	0.94935	0.94125	1	0.9863	1	0.99495
IESPGM.PTET51.1.105.7638	Early	1	1	0.9898	1	0.0861000000000001	0.2439	0.31945	0.6169	0.90835	0.9768	0.9351	0.99255	1	1	1
IESPGM.PTET51.1.105.78104	Early	1	1	1	1	0.17995	0.2569	0.3616	0.53815	0.8286	0.9111	0.89565	0.99255	0.9861	1	1
IESPGM.PTET51.1.105.79183	Early	1	0.9863	1	1	0.2282	0.3388	0.7054	0.8363	0.95525	1	0.98485	1	1	1	1
IESPGM.PTET51.1.105.79782	Early	1	1	0.9918	1	0.087	0.1495	0.3249	0.63405	0.6605	0.9225	0.94885	0.9596	0.98305	1	0.9821
IESPGM.PTET51.1.105.80340	Early	1	1	0.9909	1	0.22115	0.27085	0.67055	0.8434	0.97295	0.99205	1	1	0.99155	1	1
IESPGM.PTET51.1.105.88215	Early	1	0.96055	1	0.9872	0.21795	0.3071	0.5107	0.7502	0.9157	0.95145	0.99165	1	0.9855	1	1
IESPGM.PTET51.1.105.88709	Early	1	1	0.9612	0.9936	0.0844	0.22305	0.53015	0.7763	0.88125	0.9399	0.95835	0.9867	0.9844	1	1
IESPGM.PTET51.1.105.89821	Early	1	1	1	1	0.2941	0.20565	0.6077	0.6	0.84035	0.94495	0.98215	1	1	0.99125	1
IESPGM.PTET51.1.105.90893	Early	1	1	1	1	0.2762	0.30495	0.5205	0.8217	0.9026	1	1	0.9825	1	1	1
IESPGM.PTET51.1.105.95270	Early	1	1	0.9902	1	0.2118	0.1973	0.44275	0.6091	0.7969	0.9683	0.9298	0.99205	1	0.99055	1
IESPGM.PTET51.1.106.101797	Early	1	0.9939	0.9846	1	0.13395	0.2699	0.69815	0.86125	1	0.9942	1	1	1	1	1
IESPGM.PTET51.1.106.106394	Early	1	1	1	0.9918	0.1814	0.34305	0.657	0.9285	0.8994	0.955	1	1	0.9652	1	0.99535
IESPGM.PTET51.1.106.11463	Early	1	1	1	1	0.1786	0.251	0.4643	0.7258	0.81025	0.96005	0.9735	0.97205	0.9714	1	0.9886
IESPGM.PTET51.1.106.115344	Early	1	1	0.975	1	0.1096	0.20255	0.6325	0.6803	0.94405	0.96055	1	0.9904	1	0.98865	1
IESPGM.PTET51.1.106.122818	Early	1	1	1	0.9762	0.2543	0.34675	0.621	0.80435	0.9616	0.99	1	1	1	1	1
IESPGM.PTET51.1.106.12283	Early	0.9934	1	0.9922	1	0.13205	0.1077	0.37105	0.7184	0.8256	0.99205	0.9863	0.9839	1	1	0.9901
IESPGM.PTET51.1.106.12404	Early	1	1	0.99	1	0.3338	0.2305	0.6173	0.83485	0.91895	1	1	1	1	1	0.99485
IESPGM.PTET51.1.106.124422	Early	1	0.9778	1	1	0.1013	0.31305	0.61825	0.73385	0.9943	0.94125	0.99155	1	1	1	1
IESPGM.PTET51.1.106.128665	Early	1	1	1	1	0.1429	0.2942	0.5802	0.7732	0.8481	0.96585	0.99305	1	0.99265	1	1
IESPGM.PTET51.1.106.129368	Early	1	1	0.99425	0.99515	0.13095	0.1485	0.25	0.5397	0.84445	0.968	0.8593	0.99365	0.99275	1	1
IESPGM.PTET51.1.106.130608	Early	1	1	0.9831	1	0.11225	0.23575	0.43375	0.6905	0.96865	0.97275	0.9722	1	1	1	1
IESPGM.PTET51.1.106.138740	Early	1	1	0.988	1	0.046	0.28995	0.8493	0.90765	1	1	1	1	1	1	1
IESPGM.PTET51.1.106.141885	Early	1	1	0.9909	0.9923	0.0445	0.08175	0.3949	0.63555	0.7564	0.95485	0.91715	0.98415	0.99265	1	1
IESPGM.PTET51.1.106.144111	Early	1	1	1	1	0.2415	0.26255	0.51005	0.7707	0.931	0.9388	0.9901	1	1	1	1
IESPGM.PTET51.1.106.145200	Early	1	1	1	1	0.1222	0.24215	0.63625	0.80785	0.93205	0.96895	0.94755	0.9943	0.98865	0.9796	0.99105
IESPGM.PTET51.1.106.14567	Early	1	1	1	1	0.09965	0.22405	0.57825	0.6376	0.7345	0.9233	0.9608	0.9697	1	1	1
IESPGM.PTET51.1.106.146455	Early	1	1	1	0.98835	0.1016	0.4432	0.5879	0.6107	0.9036	0.97205	0.9936	0.99165	0.9799	1	0.99265
IESPGM.PTET51.1.106.156553	Early	1	1	0.99125	0.99075	0.12665	0.25655	0.57	0.75705	0.94895	0.9865	1	0.99275	1	1	0.99425
IESPGM.PTET51.1.106.158961	Early	1	0.99255	1	1	0.1942	0.33825	0.6221	0.75885	0.8546	0.9091	1	0.98485	1	1	1
IESPGM.PTET51.1.106.16040	Early	1	1	1	0.9924	0.1514	0.3016	0.4607	0.7553	0.8913	0.9325	1	1	1	1	1
IESPGM.PTET51.1.106.163430	Early	1	0.9904	0.99155	1	0.1875	0.22035	0.66325	0.88055	0.9137	0.9746	1	1	1	1	0.9889
IESPGM.PTET51.1.106.175180	Early	1	1	0.99255	0.9888	0.0984499999999999	0.12	0.64205	0.62	0.7154	0.7867	0.80975	0.9831	1	1	0.98555
IESPGM.PTET51.1.106.17816	Early	1	1	1	1	0.3466	0.29395	0.5741	0.641	0.92435	0.9027	0.95615	0.975	1	1	1
IESPGM.PTET51.1.106.17903	Early	1	1	1	1	0.13555	0.1117	0.39025	0.70275	0.78605	0.98335	0.94395	1	1	1	0.9946
IESPGM.PTET51.1.106.188333	Early	1	1	1	1	0.19675	0.251	0.5238	0.8477	0.81775	0.964	0.9411	1	1	0.99	1
IESPGM.PTET51.1.106.190555	Early	1	1	0.9904	1	0.0731999999999999	0.12005	0.40995	0.5609	0.78965	0.9585	1	0.9861	0.99295	1	1
IESPGM.PTET51.1.106.19436	Early	0.99275	1	0.98865	1	0.09015	0.11855	0.67385	0.95455	1	0.98915	1	1	0.99155	1	1
IESPGM.PTET51.1.106.20287	Early	1	1	0.97785	1	0.04555	0.1614	0.51015	0.72395	0.93	1	1	1	1	1	1
IESPGM.PTET51.1.106.217026	Early	1	1	1	0.9914	0.07575	0.1987	0.3791	0.4923	0.9458	0.9688	0.9853	1	1	1	1
IESPGM.PTET51.1.106.233467	Early	1	1	0.9661	1	0.0827	0.2379	0.5017	0.78945	0.9803	1	0.975	0.99265	1	1	0.99505
IESPGM.PTET51.1.106.234598	Early	1	1	0.98115	1	0.2035	0.1748	0.6084	0.84235	0.95755	0.9664	1	0.98115	0.9922	1	1
IESPGM.PTET51.1.106.23563	Early	1	1	1	1	0.0660000000000001	0.20195	0.26055	0.43195	0.86435	0.9461	1	1	1	1	0.9901
IESPGM.PTET51.1.106.23581	Early	1	1	0.99255	1	0.0463	0.16085	0.41355	0.5405	0.8179	0.9878	0.92625	1	1	1	1
IESPGM.PTET51.1.106.254075	Early	0.99315	0.9634	1	0.9881	0.1574	0.2679	0.44485	0.6107	0.80335	0.9394	0.94515	1	1	1	1
IESPGM.PTET51.1.106.256579	Early	1	1	0.99295	0.99485	0.0983499999999999	0.18085	0.32485	0.8165	0.92685	1	1	1	0.98935	0.99	1
IESPGM.PTET51.1.106.259955	Early	1	1	1	0.9815	0.2062	0.36605	0.80125	0.7408	0.80895	0.9841	1	0.97525	0.95	1	1
IESPGM.PTET51.1.106.270142	Early	1	0.98485	0.99105	1	0.23515	0.16	0.32875	0.5919	0.7238	0.90745	0.9778	1	1	1	1
IESPGM.PTET51.1.106.271631	Early	1	1	1	1	0.2355	0.3617	0.643	0.9161	0.9538	1	1	1	1	1	1
IESPGM.PTET51.1.106.274148	Early	1	1	0.9467	1	0.1	0.2445	0.4673	0.7939	0.8989	0.9804	0.95735	0.99125	1	1	1
IESPGM.PTET51.1.106.274450	Early	1	1	0.98835	1	0.09675	0.25735	0.64105	0.63425	0.91155	0.93215	1	1	1	1	1
IESPGM.PTET51.1.106.276798	Early	1	1	1	1	0.12905	0.23875	0.38255	0.4787	0.9224	0.9851	0.9885	0.98875	1	1	0.9957
IESPGM.PTET51.1.106.277532	Early	1	0.9559	0.9768	1	0.2665	0.2521	0.5304	0.65615	0.91405	0.99125	1	0.98165	0.9918	1	1
IESPGM.PTET51.1.106.282313	Early	1	1	1	1	0.554	0.4097	0.64765	0.5263	0.80885	0.97305	0.9726	0.9556	0.9778	1	1
IESPGM.PTET51.1.106.286750	Early	1	1	1	0.9865	0.20665	0.12435	0.46185	0.5714	0.77615	0.9023	0.85785	0.97525	0.99255	1	1
IESPGM.PTET51.1.106.286924	Early	1	1	1	1	0.3326	0.44545	0.2367	0.6982	0.7587	0.89795	0.8868	0.9904	0.9861	1	1
IESPGM.PTET51.1.106.296808	Early	0.9439	1	1	1	0.14135	0.24445	0.3675	0.69295	0.68895	0.86095	0.9565	0.9464	1	1	0.99335
IESPGM.PTET51.1.106.300703	Early	0.98075	1	1	1	0.18055	0.34055	0.4803	0.6337	0.8362	0.9612	1	1	0.9934	0.9706	0.9787
IESPGM.PTET51.1.106.30170	Early	1	1	0.99125	1	0.1381	0.3315	0.6439	0.8838	0.9766	1	1	1	1	1	1
IESPGM.PTET51.1.106.30266	Early	1	1	0.9918	1	0.0994999999999999	0.1125	0.27155	0.7222	0.82835	0.9448	0.955	1	1	1	1
IESPGM.PTET51.1.106.30911	Early	1	1	0.987	1	0.24665	0.4229	0.7032	0.7811	0.8784	0.9199	0.9134	0.9807	1	0.98	1
IESPGM.PTET51.1.106.38045	Early	1	1	0.9868	0.9918	0.02115	0.2034	0.4056	0.7838	0.91415	0.9589	0.96325	0.9828	1	1	1
IESPGM.PTET51.1.106.38987	Early	1	1	1	1	0.3538	0.28675	0.58545	0.6621	0.90165	0.9579	1	0.9898	1	1	1
IESPGM.PTET51.1.106.45681	Early	1	1	0.9846	1	0.2242	0.17565	0.4433	0.62985	0.8406	0.96585	1	1	0.97845	1	1
IESPGM.PTET51.1.106.46612	Early	1	1	0.98075	1	0.2843	0.4159	0.4701	0.83895	0.95655	0.99285	1	1	1	1	1
IESPGM.PTET51.1.106.46718	Early	1	1	0.95485	1	0.12595	0.13335	0.3313	0.62715	0.806	0.95735	0.98215	1	1	1	1
IESPGM.PTET51.1.106.48302	Early	1	1	1	1	0.0330999999999999	0.1463	0.1765	0.62475	0.77565	0.9543	0.91665	0.99	1	1	1
IESPGM.PTET51.1.106.5019	Early	1	1	1	1	0.25215	0.2997	0.57865	0.79655	0.95655	0.99055	1	0.9802	0.9855	1	1
IESPGM.PTET51.1.106.52209	Early	1	1	1	1	0.175	0.21955	0.56765	0.76575	0.96245	0.98245	1	1	1	1	1
IESPGM.PTET51.1.106.60401	Early	0.99265	1	0.99105	1	0.18335	0.2128	0.5294	0.74825	0.92375	1	0.96905	1	0.97965	1	1
IESPGM.PTET51.1.106.61267	Early	1	1	1	0.99075	0.02445	0.2032	0.60365	0.8503	0.9444	1	1	1	1	1	1
IESPGM.PTET51.1.106.61273	Early	1	1	1	0.9902	0.0317499999999999	0.1312	0.82555	0.8746	0.96505	1	0.99305	1	0.99275	1	1
IESPGM.PTET51.1.106.6337	Early	1	1	1	1	0.16845	0.2431	0.29755	0.48305	0.87495	0.9492	0.9492	1	1	1	1
IESPGM.PTET51.1.106.64555	Early	1	1	0.99195	1	0.05665	0.127	0.5	0.5982	0.93865	0.9674	1	1	0.99265	1	1
IESPGM.PTET51.1.106.75072	Early	0.98335	0.96105	1	0.9941	0.1404	0.1445	0.6556	0.8765	0.957	0.9868	0.9685	0.98485	0.9846	0.99155	1
IESPGM.PTET51.1.106.78603	Early	1	0.9717	1	1	0.106	0.1485	0.26845	0.5856	0.7195	0.9681	0.9081	0.99155	0.9853	1	1
IESPGM.PTET51.1.106.79426	Early	1	1	1	1	0.04345	0.19695	0.55185	0.6587	0.87355	0.95025	0.92475	1	0.98115	1	1
IESPGM.PTET51.1.106.83813	Early	1	1	0.9922	1	0.1818	0.25805	0.5465	0.57435	0.85965	0.97845	1	1	0.9839	1	0.9802
IESPGM.PTET51.1.106.91146	Early	1	1	1	1	0.17535	0.18335	0.62155	0.72225	0.9393	0.97205	0.9672	1	0.99105	1	1
IESPGM.PTET51.1.106.92862	Early	1	0.99405	1	1	0.29705	0.3868	0.7467	0.73195	0.8359	0.9692	0.9833	1	1	1	1
IESPGM.PTET51.1.106.96176	Early	1	1	0.9875	1	0.0875999999999999	0.2169	0.56685	0.82815	0.9175	0.9898	1	0.9885	1	1	1
IESPGM.PTET51.1.106.97147	Early	1	0.98505	1	1	0.22655	0.1434	0.46925	0.6962	0.854	0.98485	1	1	1	1	1
IESPGM.PTET51.1.106.97281	Early	1	1	0.99155	1	0.0669500000000001	0.3224	0.375	0.68155	0.7805	0.9324	0.93915	0.99295	0.98165	0.9767	1
IESPGM.PTET51.1.107.102985	Early	1	1	0.9914	1	0.0723499999999999	0.098	0.558	0.6693	0.8959	0.9583	1	0.98835	0.9922	1	0.9934
IESPGM.PTET51.1.107.103028	Early	1	1	1	1	0.0458499999999999	0.12915	0.44865	0.83135	0.92555	0.9902	1	1	1	1	1
IESPGM.PTET51.1.107.104059	Early	1	1	1	1	0.22805	0.24795	0.48095	0.72795	0.8995	0.98335	0.9861	1	1	1	1
IESPGM.PTET51.1.107.107693	Early	1	1	0.9942	1	0.21905	0.2568	0.60085	0.8962	0.9654	0.97845	0.97905	0.9941	0.99365	1	1
IESPGM.PTET51.1.107.111776	Early	1	1	0.9818	1	0.1305	0.28225	0.51605	0.6863	0.88765	0.95245	0.92315	0.98	0.9846	1	0.95875
IESPGM.PTET51.1.107.117243	Early	1	1	1	1	0.2081	0.2801	0.5543	0.8617	0.8747	0.99055	0.964	1	0.99365	1	1
IESPGM.PTET51.1.107.122649	Early	1	1	1	0.99535	0.186	0.28615	0.6154	0.74425	0.90495	0.92015	1	1	1	1	1
IESPGM.PTET51.1.107.131107	Early	1	1	0.99375	1	0.1385	0.1731	0.34695	0.5701	0.83565	0.9209	0.928	1	0.98165	1	1
IESPGM.PTET51.1.107.132405	Early	1	1	1	1	0.3424	0.2184	0.62255	0.7813	0.9203	1	0.99165	1	0.9882	1	0.991
IESPGM.PTET51.1.107.135481	Early	1	0.98385	1	1	0.18	0.227	0.30945	0.5359	0.72275	0.98215	0.9535	1	1	1	1
IESPGM.PTET51.1.107.136343	Early	1	1	1	1	0.23155	0.26595	0.6802	0.84585	0.9706	1	0.99385	1	1	1	1
IESPGM.PTET51.1.107.144478	Early	1	1	0.987	0.9945	0.11675	0.2628	0.67675	0.77215	0.94325	0.96555	0.98505	1	1	1	1
IESPGM.PTET51.1.107.147543	Early	1	1	1	1	0.192	0.1921	0.3277	0.6261	0.9303	0.9347	0.9918	1	0.9922	0.9878	0.9954
IESPGM.PTET51.1.107.149168	Early	1	1	1	0.99545	0.1575	0.3307	0.6332	0.7826	0.9826	1	1	1	1	1	1
IESPGM.PTET51.1.107.151304	Early	1	1	0.9853	1	0.07935	0.338	0.3539	0.52715	0.68495	0.93215	0.99335	1	0.987	0.99315	1
IESPGM.PTET51.1.107.151860	Early	1	1	0.969	1	0.0421	0.10265	0.3798	0.7886	0.93365	0.97905	1	0.98935	0.975	1	0.99495
IESPGM.PTET51.1.107.157828	Early	1	1	0.98865	1	0.1658	0.32345	0.5255	0.6946	0.914	0.97155	1	1	0.99195	1	1
IESPGM.PTET51.1.107.165035	Early	1	1	0.9807	1	0.2117	0.164	0.43225	0.46875	0.70335	0.8593	0.93075	0.98935	0.99425	1	1
IESPGM.PTET51.1.107.167589	Early	0.9806	1	0.9875	1	0.13975	0.20945	0.5495	0.6186	0.9021	0.9178	0.9396	0.9846	1	0.9762	0.99495
IESPGM.PTET51.1.107.174431	Early	1	1	1	1	0.1698	0.17425	0.5342	0.73255	0.87	0.97845	0.97645	0.9922	1	1	1
IESPGM.PTET51.1.107.180096	Early	1	0.99295	1	1	0.0842000000000001	0.11145	0.5203	0.62845	0.71945	0.9683	1	1	1	1	1
IESPGM.PTET51.1.107.186057	Early	1	1	0.99325	0.98935	0.22435	0.34025	0.6601	0.89175	0.96585	0.9923	1	1	1	1	1
IESPGM.PTET51.1.107.187379	Early	1	1	1	1	0.1521	0.2752	0.6286	0.7343	0.8615	0.9566	1	1	1	1	1
IESPGM.PTET51.1.107.191879	Early	1	1	0.9855	1	0.0337000000000001	0.12855	0.63495	0.82855	0.93925	0.9429	0.9211	1	1	1	1
IESPGM.PTET51.1.107.192336	Early	1	1	0.987	1	0.2108	0.1552	0.34925	0.62225	0.88525	0.91535	0.9844	1	1	1	1
IESPGM.PTET51.1.107.194357	Early	1	1	1	1	0.0257000000000001	0.2211	0.52965	0.7502	0.7479	0.87625	0.9412	0.98	0.9437	1	0.9857
IESPGM.PTET51.1.107.199227	Early	1	0.9881	0.9914	1	0.0932999999999999	0.18785	0.4072	0.706	0.8333	1	1	1	1	1	1
IESPGM.PTET51.1.107.205290	Early	1	1	1	0.9861	0.12905	0.1252	0.4002	0.7645	0.96325	0.9552	1	1	1	0.99155	1
IESPGM.PTET51.1.107.205489	Early	1	1	0.99205	1	0.0926	0.2056	0.56805	0.8041	0.8974	0.9922	1	1	1	1	1
IESPGM.PTET51.1.107.205853	Early	1	1	0.9787	0.9865	0.1667	0.3379	0.6863	0.81325	0.96	0.9708	0.9853	1	1	1	1
IESPGM.PTET51.1.107.208712	Early	1	1	0.97965	0.92895	0.149	0.3295	0.53095	0.75865	0.79575	0.972	1	0.9909	0.9474	0.9699	0.9947
IESPGM.PTET51.1.107.22392	Early	1	1	1	0.9861	0.1193	0.0976	0.4924	0.50605	0.7786	0.96185	0.89725	0.99155	1	1	1
IESPGM.PTET51.1.107.235654	Early	0.9873	1	0.99365	1	0.20785	0.19785	0.5635	0.6786	0.82075	0.91825	0.9138	0.9833	0.99195	1	0.99575
IESPGM.PTET51.1.107.242571	Early	1	1	1	0.989	0.2243	0.2889	0.68105	0.87655	0.93415	1	1	0.97875	1	1	1
IESPGM.PTET51.1.107.246639	Early	1	1	1	1	0.07085	0.1931	0.4521	0.73515	0.85955	0.97305	0.9853	0.9821	0.98665	1	1
IESPGM.PTET51.1.107.280917	Early	1	1	0.975	1	0.172	0.31385	0.6817	0.89975	0.9953	1	1	1	1	1	1
IESPGM.PTET51.1.107.299193	Early	1	1	0.9859	1	0.0426	0.10375	0.3176	0.65	0.80975	0.97785	0.98255	0.9914	1	1	1
IESPGM.PTET51.1.107.299823	Early	1	0.9552	1	1	0.21955	0.1802	0.2611	0.7608	0.9084	0.92465	0.91875	1	1	1	1
IESPGM.PTET51.1.107.300116	Early	1	1	0.9761	0.9841	0.30205	0.27985	0.38765	0.7079	0.9062	0.97635	1	1	1	1	0.99375
IESPGM.PTET51.1.107.30446	Early	0.9914	1	0.97605	1	0.22965	0.2921	0.6351	0.89605	0.96905	0.9904	1	1	1	1	1
IESPGM.PTET51.1.107.35448	Early	1	1	1	1	0.19575	0.1655	0.39065	0.6325	0.7387	0.96505	1	1	1	1	0.9945
IESPGM.PTET51.1.107.36891	Early	1	1	1	1	0.1592	0.21	0.3273	0.67205	0.9291	0.9811	1	1	1	1	1
IESPGM.PTET51.1.107.41323	Early	1	1	1	1	0.17255	0.1575	0.3539	0.54965	0.79	0.97095	0.99055	0.98915	0.99125	1	0.99475
IESPGM.PTET51.1.107.41911	Early	1	1	0.99205	1	0.0692	0.2169	0.4338	0.50745	0.8826	0.9482	1	0.9787	0.9815	1	1
IESPGM.PTET51.1.107.45559	Early	1	1	0.9878	1	0.1748	0.1839	0.67995	0.8472	0.96385	0.99325	0.98685	1	1	0.98835	1
IESPGM.PTET51.1.107.5377	Early	1	0.96155	1	1	0.07605	0.1185	0.41305	0.6415	0.5831	0.94165	0.87805	0.9787	0.97645	1	1
IESPGM.PTET51.1.107.54838	Early	1	1	1	0.9918	0.1429	0.11235	0.2797	0.56	0.9171	0.8926	0.97825	0.9808	1	1	1
IESPGM.PTET51.1.107.55059	Early	1	1	1	1	0.1145	0.29395	0.71035	0.85725	0.96645	1	1	0.9914	1	0.98915	1
IESPGM.PTET51.1.107.59674	Early	1	1	0.9853	1	0.0624	0.10285	0.33785	0.5608	0.75905	0.96175	1	0.9941	1	1	1
IESPGM.PTET51.1.107.66151	Early	1	1	1	1	0.05665	0.114	0.3474	0.5628	0.9237	0.8925	0.98335	1	0.99365	1	1
IESPGM.PTET51.1.107.66696	Early	1	1	0.9877	1	0.2305	0.2565	0.7183	0.88675	0.97675	0.9814	1	1	1	1	1
IESPGM.PTET51.1.107.68046	Early	1	1	1	0.99375	0.23765	0.25005	0.68105	0.84595	0.86245	0.9526	0.9673	1	0.9934	1	1
IESPGM.PTET51.1.107.6831	Early	1	1	0.9818	0.9808	0.16695	0.1889	0.43145	0.5766	0.91955	0.94785	0.927	0.9672	1	0.98915	1
IESPGM.PTET51.1.107.72906	Early	1	1	0.9923	0.994	0.1655	0.33715	0.68895	0.7494	0.81275	0.94915	0.9818	0.9872	1	0.9898	0.99375
IESPGM.PTET51.1.107.75875	Early	1	1	0.99335	1	0.1381	0.40035	0.71875	0.83695	0.94625	0.9656	1	1	1	1	1
IESPGM.PTET51.1.107.80193	Early	0.99475	1	0.9885	0.9924	0.13365	0.2357	0.7026	0.74425	0.7796	0.99265	1	1	1	1	0.9888
IESPGM.PTET51.1.107.83724	Early	1	1	1	1	0.2467	0.27985	0.4191	0.77795	0.79865	0.92805	0.9939	1	1	0.99155	1
IESPGM.PTET51.1.107.84854	Early	1	1	1	1	0.11895	0.11555	0.34175	0.6487	0.90475	0.9589	0.97655	1	1	1	1
IESPGM.PTET51.1.107.84866	Early	1	1	1	1	0.21365	0.1714	0.72465	0.86975	1	1	1	1	1	1	1
IESPGM.PTET51.1.107.85118	Early	1	1	1	1	0.0574	0.14055	0.5287	0.76195	0.96805	0.97905	0.97585	1	1	1	1
IESPGM.PTET51.1.107.85349	Early	1	1	1	1	0.1562	0.26325	0.65055	0.78745	0.9471	0.975	1	1	1	1	1
IESPGM.PTET51.1.107.87014	Early	1	0.9805	1	1	0.13815	0.2699	0.67135	0.88595	1	0.99125	1	1	1	1	1
IESPGM.PTET51.1.107.87555	Early	1	1	0.99325	0.97845	0.17825	0.2329	0.6452	0.67665	0.91495	0.9846	0.9762	0.97905	0.99295	1	1
IESPGM.PTET51.1.107.87967	Early	1	1	1	1	0.1686	0.34025	0.60735	0.78935	0.84575	0.9804	0.8955	1	1	1	1
IESPGM.PTET51.1.107.952	Early	1	1	1	1	0.2002	0.3416	0.6778	0.9077	0.92105	0.99335	0.9762	1	0.9935	1	1
IESPGM.PTET51.1.107.95638	Early	1	1	0.99255	0.988	0.0945	0.1	0.27485	0.70215	0.88795	0.94645	0.9685	0.98115	1	1	1
IESPGM.PTET51.1.108.108769	Early	0.99315	0.99315	0.98485	1	0.11605	0.30615	0.48075	0.8167	0.882	0.9669	0.9894	1	1	1	1
IESPGM.PTET51.1.108.109629	Early	1	1	1	1	0.15265	0.10555	0.4399	0.50015	0.7864	0.9509	0.9344	0.99385	1	1	1
IESPGM.PTET51.1.108.112635	Early	1	1	0.9939	1	0.0603	0.21435	0.4764	0.7543	0.79455	0.99255	0.98215	1	1	1	1
IESPGM.PTET51.1.108.119638	Early	1	1	0.99155	1	0.13085	0.17585	0.34465	0.6056	0.77865	0.89215	0.92625	1	0.97715	1	0.9898
IESPGM.PTET51.1.108.124612	Early	1	1	1	1	0.16195	0.12795	0.21	0.61225	0.7644	0.9367	0.96705	0.9799	1	1	1
IESPGM.PTET51.1.108.126146	Early	1	1	1	1	0.15275	0.2138	0.6397	0.8865	0.98115	1	0.9758	1	1	1	1
IESPGM.PTET51.1.108.133249	Early	1	1	1	0.98835	0.14955	0.0981	0.4449	0.6331	0.85585	0.95155	0.90685	0.9836	0.99255	1	1
IESPGM.PTET51.1.108.133622	Early	1	1	0.9898	1	0.3498	0.1892	0.5932	0.70865	0.902	0.9909	0.97435	1	1	1	1
IESPGM.PTET51.1.108.134167	Early	1	1	1	1	0.0213	0.0762	0.4775	0.6601	0.8862	0.97095	0.98235	0.99055	0.99365	1	1
IESPGM.PTET51.1.108.138125	Early	1	1	0.9923	1	0.151	0.32455	0.52	0.6769	0.87585	0.94855	0.9746	0.9918	1	1	1
IESPGM.PTET51.1.108.151036	Early	1	1	0.9865	1	0.04175	0.19435	0.4106	0.59435	0.67775	0.9458	0.9403	0.98385	1	1	0.99105
IESPGM.PTET51.1.108.153129	Early	1	1	0.9831	0.99295	0.22245	0.13845	0.25795	0.468	0.87105	0.98385	0.98115	0.9914	1	1	1
IESPGM.PTET51.1.108.154766	Early	1	1	1	1	0.1023	0.3178	0.5	0.77415	0.91955	0.95025	1	0.9946	1	1	1
IESPGM.PTET51.1.108.156548	Early	1	1	0.9944	1	0.1686	0.196	0.2305	0.77935	0.82635	0.96785	1	1	1	1	1
IESPGM.PTET51.1.108.164150	Early	1	1	1	1	0.1527	0.1932	0.54085	0.8265	0.9783	0.9898	0.98165	1	0.9944	1	1
IESPGM.PTET51.1.108.175401	Early	1	1	1	1	0.28625	0.182	0.4281	0.84585	0.83415	0.94855	0.95455	1	0.9922	1	1
IESPGM.PTET51.1.108.176124	Early	1	1	0.968	1	0.2565	0.25395	0.67145	0.8225	0.86555	0.93465	0.9756	1	1	1	1
IESPGM.PTET51.1.108.177750	Early	1	1	1	1	0.1375	0.2243	0.4841	0.7895	0.92245	0.9231	0.9746	1	0.9714	1	1
IESPGM.PTET51.1.108.181878	Early	1	0.99295	1	1	0.0702499999999999	0.29925	0.8131	0.9295	0.9842	1	1	1	1	1	1
IESPGM.PTET51.1.108.183208	Early	0.9759	1	1	1	0.25465	0.24145	0.6069	0.78865	0.8811	0.92315	0.9623	0.9934	0.9663	0.98835	0.9802
IESPGM.PTET51.1.108.185919	Early	1	1	1	1	0.127	0.22685	0.555	0.84935	1	1	1	1	1	1	1
IESPGM.PTET51.1.108.18808	Early	1	1	0.99365	1	0.03925	0.21065	0.4129	0.6852	0.9335	0.9706	1	1	1	1	1
IESPGM.PTET51.1.108.192513	Early	1	0.99055	0.9922	1	0.1072	0.32435	0.80955	0.8611	0.99105	0.99255	1	1	1	1	1
IESPGM.PTET51.1.108.196150	Early	1	1	0.9935	1	0.1405	0.17285	0.63495	0.75095	0.9048	0.9811	0.97375	1	1	1	0.98835
IESPGM.PTET51.1.108.199438	Early	1	1	1	1	0.23355	0.2242	0.4447	0.66875	0.862	0.9688	1	0.9846	1	1	1
IESPGM.PTET51.1.108.205789	Early	1	1	1	1	0.11225	0.09545	0.6371	0.7968	0.95245	0.9851	1	1	1	1	1
IESPGM.PTET51.1.108.210153	Early	1	1	1	1	0.0427	0.27475	0.6223	0.7262	0.79705	0.97715	1	1	1	1	1
IESPGM.PTET51.1.108.210874	Early	1	1	1	0.9659	0.12325	0.24075	0.619	0.7423	0.9283	0.97715	0.96025	1	1	1	1
IESPGM.PTET51.1.108.212474	Early	1	1	0.99325	1	0.0978	0.3569	0.73345	0.8249	0.97255	0.97785	0.9863	1	1	1	1
IESPGM.PTET51.1.108.218337	Early	1	1	1	1	0.07535	0.16215	0.42435	0.7606	0.7961	0.9821	0.9778	1	1	1	0.9945
IESPGM.PTET51.1.108.220170	Early	0.9934	1	0.9888	1	0.1322	0.26265	0.4084	0.6803	0.7801	0.90035	0.87745	0.99205	0.9939	1	1
IESPGM.PTET51.1.108.22141	Early	1	1	0.99375	1	0.0649	0.2344	0.47215	0.65645	0.84555	0.95485	0.9353	0.97815	1	1	1
IESPGM.PTET51.1.108.228430	Early	1	1	1	0.9859	0.1429	0.29425	0.64265	0.8462	0.93145	0.9839	1	1	1	1	1
IESPGM.PTET51.1.108.237772	Early	1	1	0.99275	1	0.22035	0.28015	0.7013	0.91595	0.90495	0.9922	0.9839	1	0.9934	1	1
IESPGM.PTET51.1.108.25352	Early	0.95805	1	0.99285	1	0.17845	0.19145	0.33885	0.6996	0.7083	0.9335	0.97855	0.99265	0.9749	0.9773	0.97545
IESPGM.PTET51.1.108.261035	Early	1	1	0.99325	1	0.21965	0.19825	0.738	0.8933	0.9905	0.98305	0.99285	1	1	1	1
IESPGM.PTET51.1.108.26451	Early	1	1	0.9923	0.9943	0.1148	0.1597	0.5567	0.7034	0.86495	0.98485	0.9396	0.9712	1	1	1
IESPGM.PTET51.1.108.274850	Early	1	1	1	1	0.0825499999999999	0.2756	0.48005	0.79475	0.92595	0.9814	1	1	1	1	1
IESPGM.PTET51.1.108.278887	Early	1	1	1	0.99055	0.11675	0.1782	0.3615	0.53925	0.7212	0.879	0.8917	1	1	1	1
IESPGM.PTET51.1.108.27954	Early	1	0.9923	1	1	0.0808	0.14745	0.285	0.5501	0.88845	0.8901	0.95545	0.9846	1	1	0.9873
IESPGM.PTET51.1.108.279789	Early	1	1	1	0.9808	0.0948	0.2721	0.57925	0.78055	0.8081	0.9571	0.9844	1	0.99325	1	0.99
IESPGM.PTET51.1.108.30783	Early	1	1	1	1	0.1568	0.13345	0.2381	0.59705	0.8524	0.973	0.90965	1	1	1	1
IESPGM.PTET51.1.108.39464	Early	1	1	1	0.99155	0.13345	0.15645	0.53725	0.74175	0.9884	0.9922	1	1	0.99365	1	0.9882
IESPGM.PTET51.1.108.40658	Early	1	1	1	1	0.23825	0.2328	0.3939	0.67295	0.95285	1	0.9825	0.9773	1	1	0.9857
IESPGM.PTET51.1.108.41632	Early	1	1	1	1	0.19685	0.32045	0.51725	0.72995	0.905	0.9612	1	0.9827	0.9923	1	1
IESPGM.PTET51.1.108.42049	Early	1	1	1	1	0.1482	0.37055	0.6053	0.82855	0.9135	0.97035	1	1	1	1	1
IESPGM.PTET51.1.108.45769	Early	1	1	1	0.9872	0.19615	0.2087	0.5634	0.7095	0.8697	0.9529	0.99335	0.9936	1	1	1
IESPGM.PTET51.1.108.52720	Early	1	1	1	1	0.1471	0.26325	0.523	0.7345	0.9651	0.96945	0.995	0.97785	1	1	1
IESPGM.PTET51.1.108.5913	Early	0.99375	1	1	1	0.13315	0.1495	0.4214	0.69505	0.74645	0.9106	0.9539	0.96555	0.9946	0.99125	1
IESPGM.PTET51.1.108.59280	Early	1	1	0.9857	0.99	0.1598	0.24865	0.5789	0.74825	0.92025	0.99265	0.98455	0.9922	1	1	1
IESPGM.PTET51.1.108.63835	Early	0.99375	1	1	1	0.06155	0.14295	0.24295	0.65555	0.83195	0.9664	0.9778	0.9851	1	1	1
IESPGM.PTET51.1.108.70274	Early	1	1	1	1	0.12	0.352	0.57475	0.6771	0.9026	0.95405	0.9008	0.9708	1	1	1
IESPGM.PTET51.1.108.72442	Early	1	1	0.9857	0.9839	0.18	0.0403	0.46675	0.6529	0.84995	0.9541	0.99315	0.9902	1	1	1
IESPGM.PTET51.1.108.75182	Early	1	1	1	0.99275	0.2445	0.2146	0.6945	0.86925	0.95585	1	1	1	1	1	1
IESPGM.PTET51.1.108.76285	Early	1	1	1	0.9861	0.1716	0.1748	0.43975	0.60245	0.78095	0.9643	1	0.99325	1	1	1
IESPGM.PTET51.1.108.79738	Early	1	1	0.97815	1	0.0750999999999999	0.07935	0.2418	0.5743	0.79585	0.96685	0.9778	0.99195	1	1	1
IESPGM.PTET51.1.108.79837	Early	1	1	0.9818	0.99105	0.1527	0.27725	0.7341	0.8889	0.899	0.97825	1	1	1	1	1
IESPGM.PTET51.1.108.84031	Early	1	0.9922	1	1	0.1926	0.26345	0.79785	0.8801	0.98255	1	1	0.99105	0.9885	1	1
IESPGM.PTET51.1.108.85121	Early	1	0.9758	1	1	0.10265	0.1518	0.3774	0.52645	0.81685	0.9437	0.99255	0.9922	1	1	1
IESPGM.PTET51.1.108.89251	Early	1	1	1	1	0.1571	0.21775	0.4768	0.48145	0.8434	0.9233	0.9427	0.99255	0.9799	1	1
IESPGM.PTET51.1.108.91034	Early	1	1	0.99295	1	0.1905	0.1864	0.4125	0.56445	0.7226	0.8906	0.8228	1	0.98185	1	0.98435
IESPGM.PTET51.1.108.98863	Early	1	1	1	0.99055	0.09545	0.18655	0.44095	0.56245	0.81975	0.9334	0.9818	1	1	1	0.99385
IESPGM.PTET51.1.109.102682	Early	1	1	1	0.9922	0.17035	0.165	0.59405	0.74615	0.8563	0.9412	0.9366	0.99125	1	0.9923	1
IESPGM.PTET51.1.109.105476	Early	1	1	1	1	0.07355	0.21365	0.52015	0.71785	0.94825	0.97095	1	1	0.9802	1	1
IESPGM.PTET51.1.109.106922	Early	0.99535	0.9773	1	1	0.11385	0.2016	0.3444	0.6066	0.63165	0.9242	0.92595	0.9848	0.99255	1	1
IESPGM.PTET51.1.109.107481	Early	1	0.9095	1	1	0.1743	0.2248	0.387	0.79045	0.9438	0.9704	0.97145	1	0.9873	1	1
IESPGM.PTET51.1.109.108030	Early	1	1	1	1	0.20655	0.2395	0.64815	0.64615	0.93215	0.99	1	1	1	0.9836	1
IESPGM.PTET51.1.109.111441	Early	1	1	1	1	0.11225	0.2056	0.58045	0.79015	0.87865	0.9844	0.98385	0.9909	0.99275	1	1
IESPGM.PTET51.1.109.113272	Early	1	1	1	1	0.06335	0.0325500000000001	0.28575	0.5153	0.8473	0.91825	1	1	1	0.9902	0.989
IESPGM.PTET51.1.109.114163	Early	1	1	0.9811	1	0.07255	0.19115	0.4352	0.60675	0.80395	0.92775	0.9325	1	0.9844	1	1
IESPGM.PTET51.1.109.114917	Early	1	1	0.98485	1	0.19285	0.1888	0.4586	0.4936	0.67185	0.9334	0.9413	0.9828	0.9875	1	1
IESPGM.PTET51.1.109.117625	Early	1	1	1	1	0.04545	0.17285	0.4381	0.775	0.94315	0.9324	1	1	1	1	1
IESPGM.PTET51.1.109.120468	Early	1	1	1	0.99265	0.0657000000000001	0.02325	0.6095	0.82635	0.978	1	1	0.99055	1	1	1
IESPGM.PTET51.1.109.121631	Early	1	1	1	0.99505	0.23725	0.14825	0.52285	0.7051	0.8179	0.9737	0.9818	1	1	1	1
IESPGM.PTET51.1.109.122415	Early	1	1	1	1	0.19785	0.26395	0.53485	0.71445	0.87365	0.9664	1	1	1	1	1
IESPGM.PTET51.1.109.124677	Early	1	1	1	1	0.0971	0.27745	0.602	0.71975	0.97935	1	1	1	1	1	1
IESPGM.PTET51.1.109.135954	Early	1	1	0.9935	1	0.13195	0.19875	0.30335	0.5608	0.80085	0.95545	0.8906	0.9918	1	1	1
IESPGM.PTET51.1.109.136480	Early	1	1	1	1	0.1929	0.11	0.3666	0.49595	0.8823	0.94785	0.94895	0.95585	1	1	0.99325
IESPGM.PTET51.1.109.138598	Early	0.94595	1	0.9909	1	0.21665	0.27655	0.68805	0.84575	0.9763	1	0.9674	0.99285	1	1	0.99425
IESPGM.PTET51.1.109.139576	Early	1	1	1	1	0.0527	0.2838	0.52715	0.8388	0.8867	0.9698	1	1	1	1	1
IESPGM.PTET51.1.109.144330	Early	1	1	0.97965	1	0.2691	0.1744	0.53885	0.7817	0.93965	0.95905	0.9853	1	1	1	1
IESPGM.PTET51.1.109.156681	Early	1	1	1	1	0.2423	0.2382	0.3655	0.59005	0.7691	0.9334	0.9754	1	1	1	1
IESPGM.PTET51.1.109.169144	Early	1	1	0.97445	1	0.2022	0.0822499999999999	0.2912	0.61835	0.83585	0.96405	0.9857	1	1	1	1
IESPGM.PTET51.1.109.169388	Early	1	0.99125	1	1	0.1809	0.2967	0.64215	0.8873	0.96215	0.99195	1	1	1	1	1
IESPGM.PTET51.1.109.170701	Early	1	1	1	0.99645	0.1495	0.104	0.5301	0.81755	0.8738	0.96555	1	0.9886	1	0.9902	1
IESPGM.PTET51.1.109.171974	Early	1	1	0.9839	1	0.16755	0.3212	0.6529	0.82025	0.91195	0.9855	1	1	1	1	0.9885
IESPGM.PTET51.1.109.181122	Early	1	1	1	1	0.1861	0.24175	0.5074	0.5985	0.9446	0.931	0.98835	0.9737	0.97965	1	1
IESPGM.PTET51.1.109.181978	Early	1	1	1	1	0.09335	0.3452	0.563	0.66045	0.8809	0.9126	0.9257	1	1	1	0.98185
IESPGM.PTET51.1.109.183349	Early	1	1	0.9756	0.95905	0.0656000000000001	0.2472	0.4861	0.66105	0.78	0.7112	0.868	0.99125	0.9918	0.9875	1
IESPGM.PTET51.1.109.196307	Early	1	1	1	1	0.186	0.2733	0.67035	0.93775	0.9899	1	1	1	1	1	0.989
IESPGM.PTET51.1.109.208628	Early	1	1	0.9922	0.99255	0.0531999999999999	0.08895	0.3583	0.7104	0.78025	0.96695	1	0.98275	1	1	1
IESPGM.PTET51.1.109.232041	Early	0.98865	0.9688	0.9946	1	0.13145	0.21835	0.4515	0.63625	0.858	0.96245	0.9804	0.9814	1	1	1
IESPGM.PTET51.1.109.233676	Early	1	1	1	0.989	0.13835	0.37	0.51505	0.7411	0.5895	0.9318	0.89725	0.9855	0.99155	1	0.9904
IESPGM.PTET51.1.109.243305	Early	1	1	0.9836	1	0.17465	0.32665	0.7987	0.8225	0.93715	1	1	0.99195	1	0.9889	1
IESPGM.PTET51.1.109.244245	Early	1	1	1	1	0.12085	0.3426	0.5154	0.7108	0.9494	0.9815	1	1	0.99325	1	1
IESPGM.PTET51.1.109.255329	Early	1	1	0.99315	1	0.07555	0.3489	0.60235	0.89765	0.9873	0.99285	1	1	1	1	0.9952
IESPGM.PTET51.1.109.256470	Early	1	1	0.99265	1	0.0996999999999999	0.19695	0.52175	0.7675	0.9051	0.968	0.99285	1	1	1	1
IESPGM.PTET51.1.109.258937	Early	1	1	0.99125	1	0.1769	0.2801	0.50835	0.78095	0.93075	1	1	1	1	1	1
IESPGM.PTET51.1.109.26141	Early	1	1	1	1	0.17315	0.208	0.46665	0.6579	0.9154	0.90735	0.95495	0.98165	0.95585	0.9804	1
IESPGM.PTET51.1.109.26231	Early	1	1	1	1	0.2478	0.1296	0.4852	0.59605	0.7124	0.84	0.942	1	0.9818	1	1
IESPGM.PTET51.1.109.26618	Early	1	1	1	1	0.0672	0.1482	0.5248	0.65	0.83025	0.95155	0.92085	1	0.97445	1	1
IESPGM.PTET51.1.109.276637	Early	1	1	1	0.99105	0.1409	0.22115	0.5465	0.7627	0.92355	1	1	1	1	1	1
IESPGM.PTET51.1.109.27972	Early	1	0.9091	1	1	0.1637	0.15615	0.30225	0.55015	0.87945	0.9579	0.9	1	1	1	1
IESPGM.PTET51.1.109.288062	Early	1	1	0.97565	1	0.13115	0.16695	0.1737	0.71945	0.82935	0.9712	0.9497	1	1	1	1
IESPGM.PTET51.1.109.28924	Early	1	1	1	1	0.4672	0.25	0.6754	0.83605	0.84715	0.9643	1	1	1	1	1
IESPGM.PTET51.1.109.40673	Early	1	1	1	0.98335	0.1823	0.1643	0.3635	0.53615	0.90685	0.97095	0.9855	0.99155	1	1	1
IESPGM.PTET51.1.109.55511	Early	1	1	1	1	0.1561	0.20155	0.39795	0.64765	0.8045	0.905	1	1	0.9873	0.9841	1
IESPGM.PTET51.1.109.56831	Early	1	1	1	1	0.0488999999999999	0.25035	0.69005	0.82575	0.9699	1	1	1	1	1	1
IESPGM.PTET51.1.109.61380	Early	1	1	1	1	0.1833	0.16005	0.2727	0.52	0.82935	0.9524	0.8466	1	1	1	1
IESPGM.PTET51.1.109.63159	Early	1	1	1	0.99425	0.10555	0.3023	0.65465	0.8485	1	1	1	0.99305	0.99315	1	1
IESPGM.PTET51.1.109.64220	Early	1	0.99425	1	1	0.13855	0.2357	0.37765	0.66715	0.79785	0.92755	0.96665	0.97525	1	1	1
IESPGM.PTET51.1.109.68912	Early	1	1	1	1	0.0762	0.1809	0.4396	0.613	0.7258	0.932	0.97405	0.9889	0.99335	1	1
IESPGM.PTET51.1.109.70470	Early	1	1	0.98495	1	0.0599000000000001	0.15585	0.35675	0.60295	0.9084	0.9538	0.9519	1	0.98835	0.99105	1
IESPGM.PTET51.1.109.71583	Early	1	1	1	1	0.0834999999999999	0.07145	0.30015	0.5569	0.77885	0.89435	0.9909	1	1	0.9875	1
IESPGM.PTET51.1.109.73043	Early	1	1	1	1	0.19575	0.1868	0.292	0.51295	0.92065	0.96665	1	1	1	1	1
IESPGM.PTET51.1.109.85614	Early	1	1	0.9607	1	0.25795	0.34495	0.66705	0.8074	1	0.98385	1	1	0.9865	1	1
IESPGM.PTET51.1.109.89458	Early	1	1	0.9818	1	0.14055	0.19485	0.4656	0.78095	0.8626	0.9846	0.9342	1	1	1	0.99275
IESPGM.PTET51.1.109.89945	Early	1	1	1	1	0.06475	0.0640499999999999	0.33885	0.4932	0.8472	0.95605	0.9589	1	1	1	0.9954
IESPGM.PTET51.1.109.91665	Early	1	1	1	1	0.1618	0.28605	0.6747	0.8511	0.956	0.9396	1	1	1	1	0.9956
IESPGM.PTET51.1.109.99044	Early	1	1	0.99125	1	0.1686	0.0896	0.33435	0.4783	0.9289	0.9677	0.99335	0.98275	1	1	1
IESPGM.PTET51.1.11.102828	Early	1	1	0.9943	1	0.0934999999999999	0.22225	0.4397	0.8644	0.9114	0.987	1	0.9766	0.99	1	1
IESPGM.PTET51.1.11.118094	Early	1	1	0.99315	1	0.1769	0.4069	0.7029	0.84835	0.9518	1	1	1	1	1	1
IESPGM.PTET51.1.11.126978	Early	1	1	1	0.9848	0.13605	0.0926	0.5145	0.74475	0.85395	0.9722	1	1	1	1	0.9877
IESPGM.PTET51.1.11.130552	Early	1	1	1	0.9951	0.05305	0.21405	0.4388	0.7717	0.8639	0.96735	0.9758	1	1	1	1
IESPGM.PTET51.1.11.132428	Early	1	1	1	0.99255	0.13925	0.21055	0.37015	0.50085	0.8105	0.9429	0.96735	0.9902	1	1	1
IESPGM.PTET51.1.11.132752	Early	1	1	0.99325	1	0.1988	0.192	0.4965	0.53085	0.806	0.8873	0.8901	1	0.99205	1	1
IESPGM.PTET51.1.11.134905	Early	1	1	1	1	0.2435	0.1194	0.42105	0.5872	0.7132	0.85	0.96665	0.9833	1	1	0.9908
IESPGM.PTET51.1.11.139358	Early	1	0.97435	1	1	0.19185	0.1253	0.3944	0.5975	0.8335	0.9437	0.8279	0.99375	1	1	1
IESPGM.PTET51.1.11.145648	Early	1	1	1	1	0.162	0.2011	0.38335	0.5991	0.8469	0.94265	0.9955	0.98185	1	1	1
IESPGM.PTET51.1.11.156889	Early	0.99505	1	1	1	0.2095	0.342	0.626	0.78975	0.9187	0.9839	0.99065	1	1	1	1
IESPGM.PTET51.1.11.162195	Early	1	1	1	0.9956	0.11145	0.2688	0.68545	0.8755	0.97465	0.9831	1	1	1	1	1
IESPGM.PTET51.1.11.171330	Early	1	1	0.9875	1	0.1474	0.22845	0.58115	0.7777	0.83615	0.9613	0.97725	1	1	1	1
IESPGM.PTET51.1.11.173018	Early	1	1	1	0.9894	0.08605	0.1722	0.5493	0.6667	0.9719	0.99365	1	1	0.99055	1	1
IESPGM.PTET51.1.11.178825	Early	1	1	1	1	0.2727	0.37395	0.6197	0.79435	0.96375	0.9839	1	0.97745	1	1	1
IESPGM.PTET51.1.11.183108	Early	1	1	1	1	0.1651	0.17205	0.3023	0.5599	0.7914	0.9324	0.87955	0.9412	0.99315	0.99125	0.9946
IESPGM.PTET51.1.11.192700	Early	1	0.9846	1	1	0.14225	0.31445	0.7409	0.97095	0.9153	1	1	1	1	1	1
IESPGM.PTET51.1.11.194633	Early	1	0.961	1	0.99425	0.0739	0.23025	0.775	0.8574	0.92405	0.96265	1	0.98915	0.98665	1	0.99455
IESPGM.PTET51.1.11.198729	Early	1	1	1	1	0.20635	0.27785	0.3731	0.71535	0.87765	0.9661	0.97005	1	1	1	1
IESPGM.PTET51.1.11.203401	Early	1	1	1	0.9947	0.1293	0.3813	0.6744	0.8474	0.89075	0.9677	1	0.9792	0.989	1	0.9954
IESPGM.PTET51.1.11.219693	Early	1	1	0.9868	1	0.12565	0.25465	0.462	0.72235	0.75855	0.9068	0.95485	0.9818	1	1	1
IESPGM.PTET51.1.11.222300	Early	1	1	1	1	0.19865	0.215	0.3092	0.5595	0.76745	0.9361	0.8745	0.94405	0.97565	1	0.99495
IESPGM.PTET51.1.11.224278	Early	1	1	1	0.99285	0.1125	0.1194	0.3019	0.6172	0.75005	0.93555	0.96975	0.9744	1	1	1
IESPGM.PTET51.1.11.227256	Early	0.97815	1	1	1	0.1612	0.26175	0.579	0.72535	0.8775	0.911	0.9811	1	0.9942	1	1
IESPGM.PTET51.1.11.227595	Early	1	1	0.9943	1	0.1669	0.2258	0.4093	0.6314	0.9084	0.9458	0.971	1	1	1	1
IESPGM.PTET51.1.11.229939	Early	1	1	0.99475	1	0.16835	0.3175	0.56635	0.78795	0.89455	0.9768	0.9889	1	1	1	1
IESPGM.PTET51.1.11.231265	Early	1	1	1	1	0.1686	0.25595	0.7066	0.7895	0.9198	0.9761	0.96775	0.9914	0.9886	1	1
IESPGM.PTET51.1.11.235380	Early	0.99425	1	1	1	0.1476	0.35725	0.67355	0.85865	0.9295	0.99265	1	1	1	1	1
IESPGM.PTET51.1.11.238781	Early	1	1	0.9773	1	0.17825	0.4139	0.7065	0.898	0.8109	0.9859	1	0.9873	0.9878	1	1
IESPGM.PTET51.1.11.240072	Early	1	1	0.99275	1	0.30785	0.26965	0.7594	0.78805	0.982	0.963	0.9494	1	1	1	0.9961
IESPGM.PTET51.1.11.242644	Early	1	1	0.99155	1	0.0833	0.1212	0.3576	0.55125	0.7644	0.94275	0.9375	0.9796	0.99325	0.9909	1
IESPGM.PTET51.1.11.245250	Early	1	1	0.9942	1	0.0842000000000001	0.1192	0.5576	0.6897	0.94535	0.99155	1	1	1	1	1
IESPGM.PTET51.1.11.245273	Early	1	1	1	1	0.11235	0.0782499999999999	0.4003	0.47115	0.8644	0.93165	0.8454	0.99285	1	0.9818	1
IESPGM.PTET51.1.11.250450	Early	1	1	1	0.99335	0.16875	0.32705	0.7245	0.9461	0.9524	1	1	1	1	1	0.99365
IESPGM.PTET51.1.11.251445	Early	1	1	1	1	0.16935	0.3496	0.63485	0.90735	0.95055	0.99105	0.96115	1	0.99205	1	1
IESPGM.PTET51.1.11.253564	Early	1	1	0.9776	0.9935	0.0246999999999999	0.15585	0.19505	0.56535	0.81975	0.931	0.9373	1	0.99155	1	1
IESPGM.PTET51.1.11.266017	Early	1	1	0.9846	1	0.20915	0.11765	0.31205	0.6059	0.84265	0.97965	0.95715	0.99365	1	1	1
IESPGM.PTET51.1.11.273765	Early	1	1	1	1	0.17005	0.2478	0.52605	0.85725	0.99165	0.994	1	1	1	1	1
IESPGM.PTET51.1.11.279549	Early	1	1	1	1	0.04135	0.1386	0.53795	0.72315	0.9081	0.99105	0.9776	0.9914	1	1	1
IESPGM.PTET51.1.11.283054	Early	1	1	1	1	0.17865	0.24835	0.4418	0.6125	0.8998	0.9767	0.9608	1	0.99205	1	1
IESPGM.PTET51.1.11.328920	Early	1	1	0.9886	1	0.15275	0.2051	0.5561	0.8638	0.9305	1	0.9865	0.9859	0.9935	1	1
IESPGM.PTET51.1.11.334034	Early	1	1	1	1	0.0643	0.3063	0.8138	0.85715	0.9857	0.98	0.9722	1	1	1	1
IESPGM.PTET51.1.11.335149	Early	1	1	1	0.9892	0.0698	0.38	0.4595	0.72765	0.8765	0.9714	0.91325	0.9593	1	1	1
IESPGM.PTET51.1.11.337497	Early	1	1	0.99335	1	0.12845	0.24825	0.60275	0.85005	0.9957	0.97825	1	1	1	1	1
IESPGM.PTET51.1.11.351841	Early	1	1	1	1	0.2358	0.3092	0.6364	0.84445	0.9681	1	1	1	1	1	1
IESPGM.PTET51.1.11.360206	Early	1	1	0.9958	1	0.2063	0.146	0.46965	0.49745	0.82335	0.96095	0.9844	1	1	1	1
IESPGM.PTET51.1.11.36434	Early	1	1	1	1	0.19185	0.37795	0.68135	0.90965	0.974	0.9922	1	1	1	1	1
IESPGM.PTET51.1.11.368925	Early	1	1	1	0.98875	0.0765	0.10455	0.36105	0.59345	0.9538	0.9483	0.91185	0.96605	1	0.99125	0.97645
IESPGM.PTET51.1.11.373777	Early	0.9939	1	0.9918	1	0.13755	0.332	0.78225	0.8699	0.9708	1	0.97125	0.98685	1	1	1
IESPGM.PTET51.1.11.379956	Early	0.9516	1	0.9947	1	0.27355	0.29455	0.6206	0.7538	0.8928	0.9262	0.8817	0.9848	1	1	1
IESPGM.PTET51.1.11.380302	Early	1	1	1	1	0.1211	0.31305	0.61745	0.8337	0.9439	0.968	0.9662	0.99325	1	1	1
IESPGM.PTET51.1.11.380319	Early	1	1	1	0.9897	0.0222	0.34665	0.66195	0.8562	0.95605	1	1	1	1	1	1
IESPGM.PTET51.1.11.398121	Early	1	0.99125	0.98915	1	0.0697	0.16705	0.56425	0.80725	0.86485	0.9859	0.9855	1	0.9914	1	1
IESPGM.PTET51.1.11.399461	Early	1	1	1	0.9959	0.0542499999999999	0.2258	0.584	0.87235	0.92655	0.9735	0.94655	1	1	1	1
IESPGM.PTET51.1.11.399907	Early	1	1	0.9839	1	0.21585	0.1439	0.3693	0.7123	0.8729	0.8972	0.93075	1	1	1	0.99485
IESPGM.PTET51.1.11.414254	Early	1	1	0.9945	1	0.16	0.13525	0.37065	0.5769	0.80055	0.95875	0.9468	0.97545	0.994	1	1
IESPGM.PTET51.1.11.416284	Early	1	1	1	0.9783	0.3014	0.25275	0.70435	0.7429	0.84445	0.9552	0.99125	0.9872	1	1	1
IESPGM.PTET51.1.11.425770	Early	1	1	0.9939	1	0.1839	0.2551	0.6628	0.80355	1	1	1	1	1	1	1
IESPGM.PTET51.1.11.426226	Early	1	1	1	1	0.16115	0.2529	0.6603	0.8792	1	1	0.99335	0.9898	1	1	0.9939
IESPGM.PTET51.1.11.427669	Early	1	1	1	1	0.14735	0.126	0.5772	0.81095	0.9201	0.99255	0.99315	0.97785	1	1	1
IESPGM.PTET51.1.11.430585	Early	1	1	1	0.9948	0.1218	0.24865	0.5465	0.77635	0.85315	0.96455	1	0.9821	1	1	0.99485
IESPGM.PTET51.1.11.432432	Early	1	1	0.9855	1	0.1471	0.16525	0.26905	0.55515	0.74985	0.9403	0.95835	1	0.99295	1	1
IESPGM.PTET51.1.11.441223	Early	1	1	0.9957	1	0.1264	0.24095	0.62915	0.7153	0.9459	0.912	0.96925	0.99455	0.995	1	0.9924
IESPGM.PTET51.1.11.450884	Early	1	1	1	1	0.0658	0.26245	0.3276	0.7073	0.7805	0.9753	0.97765	1	1	1	1
IESPGM.PTET51.1.11.457486	Early	1	1	0.9804	1	0.11235	0.2112	0.5933	0.75765	0.88345	0.95675	1	1	1	1	1
IESPGM.PTET51.1.11.458867	Early	1	1	0.9914	1	0.13865	0.11985	0.37665	0.698	0.8545	0.9877	0.97825	0.97785	1	1	1
IESPGM.PTET51.1.11.463516	Early	1	1	1	1	0.1151	0.2501	0.5893	0.8848	0.8919	0.9827	0.9446	1	1	1	1
IESPGM.PTET51.1.11.464415	Early	1	1	1	0.9946	0.0839	0.05665	0.34035	0.66075	0.69125	0.9367	0.9671	1	0.9923	1	1
IESPGM.PTET51.1.11.469857	Early	1	1	0.9851	1	0.12175	0.1782	0.68455	0.7974	0.97385	1	0.98935	1	1	0.9836	1
IESPGM.PTET51.1.11.475643	Early	1	1	0.9922	0.9897	0.1178	0.2203	0.526	0.7759	0.8584	1	1	0.9857	1	1	1
IESPGM.PTET51.1.11.478908	Early	1	1	1	1	0.13665	0.35725	0.68555	0.9367	0.97125	1	1	1	1	1	0.9949
IESPGM.PTET51.1.11.487705	Early	1	1	1	1	0.1072	0.1876	0.51765	0.64975	0.73175	0.92155	0.98415	0.9896	1	1	1
IESPGM.PTET51.1.11.490116	Early	1	1	0.9841	0.9774	0.14585	0.1273	0.4658	0.66845	0.81985	0.9604	0.93535	0.97845	1	1	1
IESPGM.PTET51.1.11.494858	Early	1	1	1	1	0.31365	0.31735	0.5376	0.85015	0.95915	0.9586	0.99335	1	0.9867	1	1
IESPGM.PTET51.1.11.495674	Early	1	1	1	0.99335	0.19185	0.1077	0.45055	0.75765	0.7804	0.9444	0.97675	0.9844	1	1	1
IESPGM.PTET51.1.11.502401	Early	1	1	1	1	0.18645	0.25515	0.52485	0.8909	0.9643	1	1	1	1	1	1
IESPGM.PTET51.1.11.503622	Early	1	1	0.9844	1	0.15785	0.21845	0.5588	0.8235	0.9179	0.9935	0.9725	1	1	1	1
IESPGM.PTET51.1.11.507372	Early	1	1	0.99335	0.99115	0.137	0.2392	0.7023	0.89875	0.97915	0.9898	1	0.99305	1	1	1
IESPGM.PTET51.1.11.508802	Early	1	1	0.99365	1	0.14475	0.30725	0.6717	0.85095	0.9217	1	1	0.9934	1	1	1
IESPGM.PTET51.1.11.512514	Early	1	1	0.9855	1	0.0428500000000001	0.24875	0.4621	0.6367	0.8769	0.971	1	1	0.99	1	1
IESPGM.PTET51.1.11.513636	Early	1	1	1	1	0.17825	0.3188	0.4573	0.5883	0.9073	0.9706	0.9762	1	1	1	1
IESPGM.PTET51.1.11.517639	Early	1	1	1	0.9934	0.13495	0.21375	0.59695	0.80055	0.9446	1	1	1	0.9918	1	1
IESPGM.PTET51.1.11.525358	Early	1	1	0.9853	1	0.22705	0.24165	0.3733	0.6271	0.89095	0.95285	0.93285	0.9807	1	1	1
IESPGM.PTET51.1.11.527369	Early	1	1	0.9934	1	0.0857	0.20195	0.3668	0.5647	0.83875	0.87405	0.9383	1	1	1	0.9894
IESPGM.PTET51.1.11.533687	Early	1	1	0.9821	1	0.1828	0.24405	0.4437	0.7355	0.90925	0.99155	0.92485	0.9818	1	1	0.9949
IESPGM.PTET51.1.11.536563	Early	1	1	1	1	0.3222	0.25245	0.6148	0.7853	0.82105	0.99255	1	0.9762	1	1	1
IESPGM.PTET51.1.11.548399	Early	1	1	1	1	0.04945	0.0963000000000001	0.29275	0.52905	0.76015	0.97715	0.9569	0.99265	0.99365	1	1
IESPGM.PTET51.1.11.550227	Early	1	1	0.9873	0.9877	0.22965	0.1875	0.48945	0.73555	0.77845	0.9161	0.8712	0.95245	0.9885	1	1
IESPGM.PTET51.1.11.551684	Early	1	1	0.99265	1	0.12265	0.1266	0.3462	0.6051	0.9112	0.9126	0.9794	1	0.9853	1	1
IESPGM.PTET51.1.11.557727	Early	1	0.9935	1	0.99505	0.1275	0.1757	0.4036	0.6237	0.7908	0.92755	0.98495	0.9941	1	1	0.99495
IESPGM.PTET51.1.11.560969	Early	1	1	1	1	0.19375	0.06845	0.58335	0.855	0.8656	0.97205	1	1	1	1	1
IESPGM.PTET51.1.11.563613	Early	1	1	1	1	0.1785	0.17045	0.3165	0.64285	0.8201	0.9534	0.9836	1	1	1	0.99525
IESPGM.PTET51.1.11.564724	Early	1	1	1	0.994	0.17285	0.1266	0.39215	0.61075	0.9378	0.9863	1	1	1	1	1
IESPGM.PTET51.1.11.568638	Early	1	1	0.99315	1	0.19505	0.1564	0.44455	0.8631	1	1	1	1	1	1	1
IESPGM.PTET51.1.11.569921	Early	1	1	0.9898	1	0.1909	0.1699	0.718	0.95185	0.98685	1	1	1	1	1	1
IESPGM.PTET51.1.11.584700	Early	1	1	1	1	0.1937	0.3007	0.63835	0.5895	0.9504	0.92955	1	1	0.9836	1	1
IESPGM.PTET51.1.11.591543	Early	1	1	1	1	0.0892500000000001	0.28045	0.7943	0.89315	0.96025	1	0.9936	0.9904	1	1	1
IESPGM.PTET51.1.11.610207	Early	1	1	1	1	0.1757	0.22655	0.3372	0.56615	0.8419	0.94135	0.94805	0.9841	1	1	1
IESPGM.PTET51.1.11.610890	Early	1	1	0.9846	1	0.0857	0.26845	0.5001	0.7479	0.8264	0.94725	1	1	0.97715	1	1
IESPGM.PTET51.1.11.61485	Early	1	1	1	1	0.2857	0.2731	0.61905	0.7273	0.8899	0.93745	0.9451	1	0.9888	0.9889	0.97655
IESPGM.PTET51.1.11.617672	Early	1	1	0.9861	1	0.11425	0.0871	0.3969	0.6555	0.942	0.97725	1	1	1	1	1
IESPGM.PTET51.1.11.631683	Early	1	1	0.9909	1	0.12285	0.16555	0.62	0.8663	0.95665	1	1	1	1	1	1
IESPGM.PTET51.1.11.635949	Early	1	1	0.9857	1	0.2361	0.29635	0.6667	0.97655	1	1	1	1	1	1	1
IESPGM.PTET51.1.11.641006	Early	1	0.99305	0.99385	0.9942	0.09065	0.2701	0.7178	0.84505	0.86125	0.99155	0.9712	0.99255	0.99105	1	0.9944
IESPGM.PTET51.1.11.644015	Early	1	0.9936	0.99375	1	0.1022	0.2	0.63565	0.7011	0.8182	0.89935	0.9848	0.99205	0.99295	1	1
IESPGM.PTET51.1.11.645469	Early	1	1	1	1	0.12155	0.14895	0.4804	0.77795	0.77555	0.9699	0.99195	0.9884	1	1	1
IESPGM.PTET51.1.11.652497	Early	0.99545	1	1	1	0.1194	0.1964	0.3944	0.58035	0.86645	0.9412	0.9408	1	1	1	1
IESPGM.PTET51.1.11.654926	Early	1	1	0.99325	0.995	0.1383	0.2435	0.44365	0.7407	0.87725	0.9868	1	0.99275	0.9857	1	1
IESPGM.PTET51.1.11.661646	Early	1	1	1	1	0.15535	0.15235	0.3948	0.8256	0.8508	1	1	1	1	1	1
IESPGM.PTET51.1.11.665661	Early	1	1	0.98795	1	0.09745	0.2459	0.3122	0.5954	0.8912	0.9357	0.9762	0.99375	0.9807	1	0.9924
IESPGM.PTET51.1.11.668084	Early	1	1	1	0.9853	0.07315	0.1395	0.37035	0.5217	0.7569	0.93705	0.7872	0.9787	1	1	1
IESPGM.PTET51.1.11.67275	Early	1	1	1	0.99505	0.16155	0.2944	0.45415	0.7343	0.9548	0.9291	1	1	1	1	0.9841
IESPGM.PTET51.1.11.681812	Early	1	0.99255	1	0.9941	0.1672	0.25515	0.25415	0.53835	0.78325	0.97645	0.96745	1	1	1	1
IESPGM.PTET51.1.11.69991	Early	1	1	0.99055	1	0.1618	0.10455	0.4891	0.7044	0.94315	0.94805	1	0.9861	0.9945	1	1
IESPGM.PTET51.1.11.81450	Early	1	1	1	1	0.17655	0.2009	0.58435	0.8089	0.90525	1	0.92045	1	0.9716	1	1
IESPGM.PTET51.1.110.101640	Early	1	0.99335	1	1	0.17075	0.12495	0.46155	0.79305	0.8921	0.9474	0.9878	1	1	1	1
IESPGM.PTET51.1.110.113155	Early	1	1	1	1	0.2463	0.3247	0.64075	0.69345	0.9675	0.974	0.98245	1	0.9855	0.9783	1
IESPGM.PTET51.1.110.116367	Early	1	1	0.99385	1	0.2009	0.14325	0.37215	0.54375	0.7434	0.9685	0.9904	0.9918	1	1	0.9888
IESPGM.PTET51.1.110.116897	Early	1	1	1	1	0.1786	0.15875	0.69245	0.6667	0.8833	0.9093	0.9518	1	0.9853	1	1
IESPGM.PTET51.1.110.118370	Early	1	1	1	1	0.2653	0.37565	0.62255	0.9033	0.9754	0.96785	1	1	1	1	1
IESPGM.PTET51.1.110.135381	Early	1	1	1	1	0.19135	0.1905	0.55455	0.69185	0.93585	0.97785	0.99275	1	0.99295	1	1
IESPGM.PTET51.1.110.138605	Early	1	0.99315	0.99275	0.99515	0.1159	0.0747	0.36925	0.5845	0.6631	0.912	0.97515	0.99405	0.99455	1	1
IESPGM.PTET51.1.110.140805	Early	1	1	0.9882	1	0.1371	0.2682	0.75115	0.8901	0.94705	0.99335	1	0.99315	1	1	1
IESPGM.PTET51.1.110.143948	Early	1	1	0.99455	1	0.1327	0.1964	0.8024	0.9016	0.96855	0.97565	1	0.98835	1	1	0.99495
IESPGM.PTET51.1.110.145	Early	1	0.9898	1	1	0.3331	0.1831	0.5312	0.6156	0.59095	0.95545	0.8461	1	1	1	1
IESPGM.PTET51.1.110.145999	Early	1	0.99255	1	0.99255	0.0238499999999999	0.0640000000000001	0.56325	0.66865	0.95085	0.92985	0.93265	0.9836	1	0.98935	1
IESPGM.PTET51.1.110.153846	Early	1	1	1	1	0.11605	0.18635	0.42035	0.8046	0.948	1	0.97915	0.99275	0.994	1	0.99425
IESPGM.PTET51.1.110.160002	Early	1	1	0.9857	1	0.15945	0.33165	0.71565	0.83365	0.97475	0.98115	1	0.99	0.99285	1	1
IESPGM.PTET51.1.110.162480	Early	1	1	1	1	0.24585	0.36925	0.6557	0.8771	0.95545	1	1	0.9868	1	1	0.9885
IESPGM.PTET51.1.110.168330	Early	1	1	0.9875	1	0.11335	0.06945	0.2748	0.5385	0.7603	0.96185	1	0.94935	1	1	1
IESPGM.PTET51.1.110.168725	Early	1	1	1	1	0.17035	0.3823	0.69955	0.87325	0.9325	1	1	0.99105	0.9873	1	0.99
IESPGM.PTET51.1.110.172890	Early	1	1	1	1	0.0661499999999999	0.0971500000000001	0.611	0.70275	0.97415	0.9821	1	1	1	1	1
IESPGM.PTET51.1.110.178076	Early	1	1	0.9941	0.9934	0.1013	0.17755	0.44615	0.56935	0.8074	0.93115	0.97645	1	1	1	1
IESPGM.PTET51.1.110.180551	Early	1	1	1	1	0.13195	0.25335	0.4049	0.59365	0.82335	0.94625	0.9259	1	1	0.98485	1
IESPGM.PTET51.1.110.185749	Early	1	1	1	0.99485	0.05585	0.21065	0.3869	0.5766	0.8257	0.9293	0.93165	0.9923	1	0.99055	1
IESPGM.PTET51.1.110.187662	Early	1	1	1	1	0.25005	0.3723	0.6342	0.81935	0.9067	0.9427	0.96575	0.98685	0.9881	1	1
IESPGM.PTET51.1.110.190610	Early	1	0.99455	1	1	0.176	0.12975	0.2593	0.62005	0.77315	0.9409	0.92145	0.97845	0.9922	1	0.99575
IESPGM.PTET51.1.110.198581	Early	1	1	0.98385	0.9881	0.1569	0.194	0.625	0.84335	0.9477	1	1	0.99195	1	1	0.9954
IESPGM.PTET51.1.110.199211	Early	0.9942	1	1	1	0.1961	0.28585	0.60905	0.8435	1	1	1	0.9923	1	1	1
IESPGM.PTET51.1.110.202324	Early	1	0.99275	1	0.9936	0.081	0.12075	0.452	0.6716	0.71755	0.93435	1	0.98305	1	0.9783	0.99575
IESPGM.PTET51.1.110.206766	Early	1	1	1	1	0.1429	0.17785	0.41825	0.71585	0.8491	0.9027	0.9643	0.99255	1	0.99105	1
IESPGM.PTET51.1.110.208128	Early	1	1	1	1	0.1842	0.24455	0.5211	0.80725	0.9412	1	1	1	0.99195	1	0.9949
IESPGM.PTET51.1.110.210696	Early	1	1	0.9904	1	0.0941	0.1686	0.1969	0.62145	0.88315	0.919	1	0.99375	1	0.99125	1
IESPGM.PTET51.1.110.214028	Early	1	1	1	1	0.0522	0.3285	0.5637	0.80815	0.92125	0.9841	0.9732	0.9861	1	1	1
IESPGM.PTET51.1.110.219228	Early	1	1	1	0.9844	0.0698000000000001	0.154	0.46565	0.69615	0.87105	0.93375	0.97915	1	1	1	1
IESPGM.PTET51.1.110.221067	Early	1	1	1	1	0.1001	0.212	0.2364	0.57275	0.87855	0.86965	0.88805	1	0.99125	0.9904	1
IESPGM.PTET51.1.110.222886	Early	1	1	0.97565	1	0.02415	0.20045	0.43975	0.66915	0.9134	0.93745	0.93905	1	1	0.99155	1
IESPGM.PTET51.1.110.228740	Early	1	1	0.9656	1	0.1023	0.1847	0.56835	0.723	0.84395	1	0.97435	1	1	1	1
IESPGM.PTET51.1.110.236447	Early	1	1	0.99325	1	0.15495	0.20605	0.70735	0.9155	1	0.994	1	1	1	1	1
IESPGM.PTET51.1.110.246168	Early	1	0.9924	1	1	0.11475	0.22775	0.4978	0.65895	0.92315	0.9565	0.97485	0.99255	0.97785	1	1
IESPGM.PTET51.1.110.246337	Early	1	0.9946	1	1	0.13905	0.17135	0.53655	0.8496	0.9176	0.98685	0.95015	0.9923	1	1	0.9952
IESPGM.PTET51.1.110.250033	Early	1	0.9756	1	0.9821	0.15585	0.1581	0.40375	0.4488	0.82155	0.83365	0.8726	0.9918	0.9851	1	0.988
IESPGM.PTET51.1.110.250788	Early	1	1	1	1	0.13095	0.15405	0.41445	0.64235	0.9599	1	0.95035	0.99205	1	1	1
IESPGM.PTET51.1.110.252268	Early	1	1	0.9802	0.9857	0.1809	0.225	0.4875	0.77535	0.87315	0.9458	0.9412	1	1	1	0.9952
IESPGM.PTET51.1.110.253350	Early	1	1	1	0.99	0.17335	0.10485	0.479	0.69645	0.8294	0.93475	0.9492	1	1	0.99155	0.9899
IESPGM.PTET51.1.110.254182	Early	1	1	1	1	0.0384	0.2737	0.36585	0.55005	0.72525	0.8999	0.94665	0.9885	0.99	1	1
IESPGM.PTET51.1.110.269671	Early	1	0.98935	0.98465	1	0.0449999999999999	0.2838	0.5385	0.538	0.9415	0.9262	0.9737	1	1	1	1
IESPGM.PTET51.1.110.269699	Early	1	1	0.98415	1	0.0690500000000001	0.33715	0.4975	0.80815	0.9584	0.9579	0.97525	1	1	1	1
IESPGM.PTET51.1.110.299683	Early	1	0.9318	1	1	0.07605	0.2382	0.4853	0.8332	0.8512	0.9169	0.84755	1	1	1	1
IESPGM.PTET51.1.110.32397	Early	1	1	1	1	0.1727	0.1	0.45155	0.51765	0.9589	0.93375	0.8491	0.95875	0.9855	1	1
IESPGM.PTET51.1.110.33926	Early	1	0.95	0.9859	0.97525	0.1618	0.3247	0.3152	0.6124	0.7801	0.8782	0.9165	1	1	1	0.9939
IESPGM.PTET51.1.110.41595	Early	1	1	1	1	0.25035	0.38415	0.7103	0.79545	0.9637	0.99275	0.97	1	1	1	1
IESPGM.PTET51.1.110.48613	Early	1	1	1	1	0.1669	0.19505	0.62815	0.7446	0.888	0.97965	0.99445	1	0.9839	1	1
IESPGM.PTET51.1.110.52111	Early	1	1	0.98245	0.9889	0.1456	0.20295	0.6781	0.7579	0.99285	0.98915	1	1	1	1	1
IESPGM.PTET51.1.110.60469	Early	1	1	1	1	0.2356	0.18845	0.353	0.59725	0.7022	0.96665	0.9612	0.9839	0.9841	1	1
IESPGM.PTET51.1.110.76515	Early	1	1	0.98115	1	0.26725	0.21605	0.6015	0.9173	0.9084	0.95195	0.99375	0.99285	0.994	1	0.9901
IESPGM.PTET51.1.110.85458	Early	1	1	0.9923	1	0.13145	0.2229	0.56835	0.67895	0.91075	0.9851	0.9732	0.99205	1	0.9815	1
IESPGM.PTET51.1.110.92583	Early	1	1	1	1	0.0650999999999999	0.0848	0.64165	0.89395	0.99455	0.9904	1	0.9902	1	1	1
IESPGM.PTET51.1.110.95785	Early	1	1	1	1	0.17085	0.34495	0.68965	0.8	0.88375	0.9492	1	0.99055	1	0.9828	1
IESPGM.PTET51.1.110.99451	Early	1	1	0.981	1	0.13085	0.10025	0.4477	0.72475	0.93255	0.99105	0.9603	1	1	1	1
IESPGM.PTET51.1.111.103086	Early	1	1	0.99535	1	0.32775	0.2752	0.614	0.85735	0.9672	0.99625	0.96895	1	1	1	1
IESPGM.PTET51.1.111.103259	Early	1	1	1	0.9888	0.127	0.1737	0.58635	0.60805	0.82965	0.98255	1	0.99265	1	1	0.99765
IESPGM.PTET51.1.111.106089	Early	1	1	0.9828	0.99275	0.2549	0.31655	0.64255	0.91775	0.983	0.996	1	1	1	1	1
IESPGM.PTET51.1.111.106307	Early	1	1	0.99575	1	0.2234	0.2956	0.6334	0.86535	0.97845	1	1	1	1	1	1
IESPGM.PTET51.1.111.107749	Early	1	1	0.9958	1	0.2392	0.2628	0.4595	0.65905	0.81385	0.93755	0.89205	0.99405	1	1	1
IESPGM.PTET51.1.111.111425	Early	1	1	0.99705	1	0.19845	0.2099	0.2632	0.51945	0.82275	0.8926	0.8496	0.9946	1	1	1
IESPGM.PTET51.1.111.112557	Early	1	1	0.9898	0.9941	0.0842000000000001	0.10765	0.4515	0.61495	0.9155	0.92735	0.97295	0.99	0.99625	1	1
IESPGM.PTET51.1.111.113033	Early	1	1	0.9946	1	0.12535	0.32785	0.69495	0.8991	0.9939	1	1	1	1	1	1
IESPGM.PTET51.1.111.113631	Early	1	1	0.9947	1	0.1716	0.2897	0.55675	0.7825	0.9444	0.9878	1	1	1	1	1
IESPGM.PTET51.1.111.116422	Early	1	0.9808	1	1	0.1364	0.2124	0.5381	0.6667	0.83515	0.954	0.96355	1	1	1	1
IESPGM.PTET51.1.111.12016	Early	1	1	1	0.9815	0.1735	0.2439	0.50495	0.67335	0.8545	0.94525	0.8902	0.9596	0.9756	0.9952	1
IESPGM.PTET51.1.111.120361	Early	1	1	1	1	0.2253	0.3721	0.59995	0.76285	1	0.98395	1	1	1	1	1
IESPGM.PTET51.1.111.121469	Early	1	1	0.99585	1	0.13425	0.2393	0.5093	0.81695	0.9238	0.9791	0.99325	1	0.9966	1	1
IESPGM.PTET51.1.111.130176	Early	0.98685	1	1	1	0.1507	0.1308	0.27455	0.73935	0.6634	0.9685	0.9511	0.9924	0.9962	1	1
IESPGM.PTET51.1.111.133609	Early	1	1	0.99225	1	0.1615	0.11125	0.4414	0.77925	0.8446	1	0.88935	1	0.9964	0.9956	1
IESPGM.PTET51.1.111.139997	Early	1	1	0.9952	1	0.1031	0.02415	0.43755	0.75765	0.89535	0.9865	1	0.9704	1	1	1
IESPGM.PTET51.1.111.145163	Early	1	1	0.99675	1	0.12465	0.15385	0.37455	0.63085	0.7332	0.96975	0.9785	0.9944	1	1	0.99405
IESPGM.PTET51.1.111.150404	Early	1	1	0.9886	0.99375	0.06865	0.31305	0.55265	0.7693	0.82325	0.96005	0.96135	0.99315	1	1	1
IESPGM.PTET51.1.111.152062	Early	1	1	1	1	0.2281	0.2645	0.60165	0.87085	0.9778	0.9912	1	0.9877	0.988	1	0.98865
IESPGM.PTET51.1.111.152637	Early	1	0.98735	0.9859	1	0.1789	0.1667	0.2333	0.49455	0.8566	0.9776	0.9562	0.987	0.994	1	1
IESPGM.PTET51.1.111.153026	Early	1	1	1	1	0.25385	0.35975	0.5874	0.74385	0.96975	0.99035	1	1	0.99645	1	1
IESPGM.PTET51.1.111.153486	Early	0.99425	1	1	1	0.178	0.354	0.4044	0.5637	0.73675	0.9385	0.94045	1	1	0.9952	1
IESPGM.PTET51.1.111.167605	Early	1	1	0.9937	1	0.13285	0.194	0.28475	0.67005	0.90175	0.96945	1	0.9873	1	1	0.9953
IESPGM.PTET51.1.111.172588	Early	1	1	1	1	0.10135	0.27775	0.40655	0.80935	0.9446	0.9903	1	0.9875	1	1	1
IESPGM.PTET51.1.111.17457	Early	1	1	1	1	0.2625	0.328	0.41835	0.70915	0.7063	0.91345	1	0.9898	0.9874	1	1
IESPGM.PTET51.1.111.176721	Early	1	0.9877	0.9962	1	0.12595	0.1947	0.3576	0.78415	0.8915	0.996	1	0.99105	0.9965	1	0.9974
IESPGM.PTET51.1.111.177718	Early	1	1	1	1	0.1886	0.0924	0.2128	0.62565	0.77755	0.9771	0.94685	1	1	0.9953	1
IESPGM.PTET51.1.111.187484	Early	1	1	1	1	0.13145	0.26395	0.62645	0.68045	0.85935	0.97675	0.97	1	0.9926	1	0.9934
IESPGM.PTET51.1.111.190126	Early	0.9778	1	0.99555	0.99335	0.17275	0.31195	0.33485	0.7194	0.9101	0.96325	0.90275	0.9881	0.99355	0.9944	1
IESPGM.PTET51.1.111.193697	Early	1	1	1	1	0.233	0.22925	0.5688	0.8791	0.95245	0.98735	0.9769	0.99155	1	1	1
IESPGM.PTET51.1.111.204413	Early	1	1	0.9955	1	0.10065	0.2741	0.6273	0.8062	0.9444	0.99325	0.99285	0.9924	0.99675	0.9962	1
IESPGM.PTET51.1.111.211882	Early	1	1	0.9936	1	0.20375	0.2703	0.5358	0.80935	0.9124	0.99165	0.9861	0.98865	1	1	1
IESPGM.PTET51.1.111.214106	Early	1	1	0.99575	1	0.09485	0.12745	0.53005	0.84045	0.962	0.99625	0.97825	0.9769	0.9884	1	0.9948
IESPGM.PTET51.1.111.217569	Early	0.9759	1	0.9803	1	0.1205	0.23735	0.41095	0.6234	0.72555	0.9112	0.9474	1	0.9811	1	1
IESPGM.PTET51.1.111.218666	Early	1	1	1	1	0.16775	0.1792	0.66675	0.8311	0.9162	0.9844	0.99365	0.9923	0.9925	1	0.99205
IESPGM.PTET51.1.111.219579	Early	1	1	0.9965	1	0.2347	0.25145	0.71575	0.93715	0.98845	1	1	0.9886	1	1	0.99765
IESPGM.PTET51.1.111.22033	Early	1	1	1	0.9737	0.08	0.22225	0.4644	0.81595	0.7032	0.9744	1	0.964	1	1	1
IESPGM.PTET51.1.111.224428	Early	1	1	0.98575	1	0.25695	0.205	0.5501	0.78585	0.93545	1	1	1	0.9953	1	1
IESPGM.PTET51.1.111.238601	Early	1	1	0.9905	0.98245	0.0622	0.1625	0.4924	0.8276	0.9196	1	0.9291	1	1	1	1
IESPGM.PTET51.1.111.240145	Early	1	1	0.9882	0.9949	0.09475	0.14885	0.24955	0.5828	0.7029	0.96105	0.9909	0.99315	0.99105	1	1
IESPGM.PTET51.1.111.243188	Early	1	0.9565	0.99655	0.9959	0.0742499999999999	0.1036	0.3385	0.74845	0.61425	0.9695	0.9586	0.989	0.993	1	1
IESPGM.PTET51.1.111.250649	Early	1	1	0.9955	1	0.1377	0.17465	0.29355	0.6734	0.8067	0.9524	0.96405	0.9844	1	1	1
IESPGM.PTET51.1.111.262093	Early	1	1	1	1	0.0319499999999999	0.1451	0.40035	0.75365	0.9277	0.97505	1	1	0.99565	0.99515	1
IESPGM.PTET51.1.111.273460	Early	1	1	1	1	0.1892	0.21785	0.46575	0.8121	0.83285	0.9921	0.9944	0.9851	0.99685	1	0.99775
IESPGM.PTET51.1.111.277095	Early	1	1	0.99645	1	0.11125	0.1658	0.40675	0.652	0.89345	0.9798	0.99315	0.96185	0.9934	1	1
IESPGM.PTET51.1.111.277886	Early	1	1	0.9961	1	0.1758	0.0655	0.48615	0.71775	0.87105	0.98155	0.98685	0.99305	1	1	1
IESPGM.PTET51.1.111.280406	Early	1	0.9885	0.9929	1	0.113	0.17225	0.30245	0.6767	0.67255	0.96645	0.78495	0.99265	0.9964	1	1
IESPGM.PTET51.1.111.281260	Early	1	1	0.99575	1	0.2292	0.2973	0.5795	0.88005	0.87085	0.9956	0.9731	1	1	1	0.9974
IESPGM.PTET51.1.111.282315	Early	1	1	0.99515	1	0.14135	0.24155	0.4949	0.7701	0.87605	1	0.987	0.987	1	1	1
IESPGM.PTET51.1.111.32704	Early	1	1	0.9958	0.9881	0.1939	0.284	0.6338	0.80815	0.89875	1	1	0.9768	1	1	1
IESPGM.PTET51.1.111.35555	Early	1	1	1	1	0.25855	0.20255	0.6788	0.83255	0.9378	1	1	1	1	1	1
IESPGM.PTET51.1.111.36500	Early	1	1	1	1	0.2712	0.3703	0.6375	0.8511	0.861	0.98155	1	0.99365	1	1	1
IESPGM.PTET51.1.111.39207	Early	1	1	1	1	0.2077	0.2815	0.39445	0.8175	0.95525	0.99685	1	1	1	1	0.99775
IESPGM.PTET51.1.111.44370	Early	1	1	0.99205	0.9954	0.1762	0.15965	0.4547	0.81095	0.8047	0.9795	0.926	0.98485	1	1	1
IESPGM.PTET51.1.111.47241	Early	1	1	0.9905	1	0.1827	0.13525	0.4211	0.7144	0.8988	0.9655	0.9829	0.99255	1	0.9952	0.9941
IESPGM.PTET51.1.111.48000	Early	1	1	1	1	0.1376	0.1592	0.42045	0.67105	0.77005	0.91675	0.93885	0.99165	0.9904	0.99585	0.9972
IESPGM.PTET51.1.111.50573	Early	1	1	0.9886	0.99055	0.1294	0.1569	0.4961	0.71245	0.9418	0.98395	0.9579	1	0.98775	1	1
IESPGM.PTET51.1.111.50949	Early	1	1	0.9961	1	0.1358	0.1784	0.5203	0.68765	0.8081	0.9584	0.95225	0.97905	0.9965	1	0.9921
IESPGM.PTET51.1.111.53572	Early	1	1	1	1	0.2049	0.2691	0.501	0.6114	0.7378	0.9474	1	0.9863	0.96155	1	0.99755
IESPGM.PTET51.1.111.55584	Early	1	1	1	1	0.1277	0.1334	0.33545	0.6341	0.7309	0.9609	1	0.9825	0.99615	1	1
IESPGM.PTET51.1.111.55896	Early	1	0.9891	0.99615	0.99285	0.0798000000000001	0.31595	0.5384	0.8104	0.9497	0.96945	0.92545	1	1	1	0.995
IESPGM.PTET51.1.111.56322	Early	1	1	0.9919	1	0.1262	0.07595	0.4415	0.68015	0.84205	0.96175	0.9755	1	1	1	1
IESPGM.PTET51.1.111.57620	Early	1	1	0.98535	1	0.1723	0.2177	0.47875	0.7552	0.9127	0.9811	0.9778	1	0.99635	1	1
IESPGM.PTET51.1.111.60345	Early	1	1	0.98685	1	0.13975	0.1419	0.4842	0.5743	0.7815	0.9577	1	1	1	1	0.99235
IESPGM.PTET51.1.111.60662	Early	1	1	0.9967	0.9918	0.0743499999999999	0.14225	0.4408	0.58605	0.67695	0.91525	0.9033	0.9889	0.99495	1	1
IESPGM.PTET51.1.111.61804	Early	1	1	1	0.9936	0.1274	0.29975	0.6339	0.82165	0.9311	0.9961	0.9444	1	1	1	1
IESPGM.PTET51.1.111.61934	Early	1	1	0.99535	0.9878	0.26645	0.20195	0.76115	0.86045	0.95135	1	1	0.9848	1	0.99595	1
IESPGM.PTET51.1.111.63301	Early	1	1	1	1	0.2292	0.25325	0.6151	0.80355	0.99275	0.99635	1	0.987	1	1	1
IESPGM.PTET51.1.111.67971	Early	1	0.96155	1	0.99195	0.13075	0.26085	0.6279	0.81635	1	0.98025	1	1	0.9915	1	0.9937
IESPGM.PTET51.1.111.68017	Early	1	1	1	1	0.0237000000000001	0.16005	0.3188	0.64785	0.9298	0.98315	1	1	1	1	0.9941
IESPGM.PTET51.1.111.69065	Early	1	1	1	0.99335	0.09675	0.19285	0.4116	0.69015	0.8568	0.9733	0.9841	0.99165	1	1	1
IESPGM.PTET51.1.111.71343	Early	1	1	1	0.98305	0.16455	0.1881	0.5908	0.81635	0.9828	0.99105	1	1	0.9914	0.98165	0.99705
IESPGM.PTET51.1.111.76015	Early	1	1	0.9873	1	0.15335	0.32005	0.7153	0.9096	0.9609	1	0.99325	1	1	1	1
IESPGM.PTET51.1.111.83234	Early	1	1	0.98805	1	0.18635	0.17285	0.50325	0.72115	0.90775	0.9879	1	1	0.9916	1	0.9888
IESPGM.PTET51.1.111.83845	Early	0.9899	1	0.98795	1	0.19525	0.15745	0.6047	0.68765	0.8788	0.95485	1	1	0.9943	1	1
IESPGM.PTET51.1.111.84200	Early	1	0.9923	0.99495	1	0.0923499999999999	0.1154	0.42375	0.51885	0.6845	0.97965	1	0.9909	0.99695	0.9903	1
IESPGM.PTET51.1.111.86172	Early	1	1	0.986	1	0.1461	0.1735	0.6897	0.95	1	1	1	1	1	0.9906	0.99705
IESPGM.PTET51.1.111.90820	Early	1	1	0.9873	1	0.2684	0.17945	0.2275	0.5382	0.90365	0.9618	0.9936	1	0.99395	1	0.9976
IESPGM.PTET51.1.111.91175	Early	1	1	1	1	0.25985	0.35135	0.67435	0.8193	0.8571	0.9594	1	0.9839	1	1	0.9944
IESPGM.PTET51.1.111.91395	Early	1	0.98485	0.99575	0.9956	0.18185	0.0984	0.27655	0.60355	0.7266	0.954	0.97935	1	0.99315	0.9958	1
IESPGM.PTET51.1.111.92761	Early	0.9941	1	1	1	0.26795	0.3489	0.71455	0.8386	0.92885	0.98855	0.9762	0.9875	1	1	0.9927
IESPGM.PTET51.1.111.93087	Early	1	1	0.99585	1	0.19515	0.07545	0.5984	0.80345	0.7909	1	0.9373	0.99255	0.99625	1	1
IESPGM.PTET51.1.111.93551	Early	1	0.988	1	1	0.11845	0.22255	0.2467	0.6996	0.80505	0.9504	1	1	0.9867	1	0.9978
IESPGM.PTET51.1.112.103185	Early	1	1	1	0.9885	0.2668	0.3585	0.4487	0.65765	0.8792	0.93435	0.96945	0.9863	1	1	0.9895
IESPGM.PTET51.1.112.105250	Early	1	1	0.99155	1	0.1926	0.1876	0.6391	0.7764	0.86235	0.9692	0.995	1	1	1	1
IESPGM.PTET51.1.112.112690	Early	1	1	0.981	1	0.15055	0.22985	0.44015	0.61685	0.91295	0.97155	1	1	1	1	0.99535
IESPGM.PTET51.1.112.113324	Early	1	1	0.99315	0.99405	0.1305	0.1699	0.31715	0.79245	0.9202	0.99325	0.98165	1	1	1	1
IESPGM.PTET51.1.112.119595	Early	1	0.99375	0.99375	0.9955	0.1658	0.18245	0.3253	0.7144	0.822	0.9316	0.93335	0.99255	1	1	1
IESPGM.PTET51.1.112.129712	Early	1	0.98835	0.97755	1	0.162	0.17565	0.2336	0.6165	0.77635	0.9268	0.98095	0.9881	1	1	1
IESPGM.PTET51.1.112.133653	Early	1	1	1	1	0.08335	0.26435	0.4797	0.7522	0.85665	0.95735	1	1	1	0.9818	0.987
IESPGM.PTET51.1.112.134105	Early	1	1	0.9815	1	0.1379	0.2857	0.72665	0.8655	0.93885	0.9918	1	1	0.99295	1	1
IESPGM.PTET51.1.112.148628	Early	1	1	1	1	0.1707	0.106	0.4211	0.71885	0.8462	0.98305	0.9663	0.99455	0.99375	1	1
IESPGM.PTET51.1.112.148838	Early	1	1	0.9914	1	0.1837	0.2207	0.31055	0.69515	0.76355	0.9923	0.98835	0.9855	1	1	1
IESPGM.PTET51.1.112.148893	Early	1	0.9669	0.9914	1	0.10375	0.1091	0.4652	0.65605	0.86965	0.93715	1	1	0.9706	1	1
IESPGM.PTET51.1.112.153536	Early	1	0.98685	1	1	0.143	0.19515	0.43075	0.7318	0.8455	0.93435	0.95835	0.9951	1	1	1
IESPGM.PTET51.1.112.159071	Early	1	1	0.99275	1	0.0519499999999999	0.24865	0.3857	0.67425	0.76685	0.98215	0.9881	0.98335	1	1	1
IESPGM.PTET51.1.112.16037	Early	1	1	0.9859	1	0.14445	0.23655	0.67895	0.8721	0.95465	0.9422	1	1	1	1	1
IESPGM.PTET51.1.112.161417	Early	0.9945	0.9524	0.98385	1	0.09475	0.17445	0.28245	0.5644	0.9007	0.96185	0.9586	0.98835	1	1	1
IESPGM.PTET51.1.112.167518	Early	1	1	0.9853	1	0.1	0.1472	0.45925	0.7351	0.9263	0.99295	0.96155	1	1	1	1
IESPGM.PTET51.1.112.18826	Early	1	1	0.98115	1	0.0494	0.2171	0.58945	0.5464	0.7765	0.97785	0.8396	1	1	1	1
IESPGM.PTET51.1.112.194230	Early	1	1	1	1	0.12	0.2939	0.65935	0.7821	0.9565	0.9865	1	1	1	1	1
IESPGM.PTET51.1.112.198961	Early	1	1	0.9946	0.99305	0.0467500000000001	0.1499	0.49085	0.59885	0.8264	0.9482	0.9537	1	0.9943	1	1
IESPGM.PTET51.1.112.202238	Early	1	1	0.99315	1	0.10405	0.20415	0.36705	0.7038	0.8727	0.99285	0.99155	0.9833	1	1	0.99425
IESPGM.PTET51.1.112.204560	Early	1	1	1	0.99285	0.2894	0.23355	0.5826	0.8411	0.8765	0.97415	0.9857	0.99155	0.99335	1	0.9952
IESPGM.PTET51.1.112.206111	Early	1	0.9942	1	0.99365	0.1941	0.17525	0.3256	0.5882	0.68095	0.94125	0.96265	0.9855	0.99335	1	1
IESPGM.PTET51.1.112.21169	Early	1	1	1	1	0.09305	0.34825	0.7343	0.93745	0.98335	1	1	1	1	1	1
IESPGM.PTET51.1.112.214246	Early	1	1	1	1	0.1023	0.3248	0.7324	0.9167	0.97875	1	1	1	1	1	0.9939
IESPGM.PTET51.1.112.218580	Early	1	1	0.9853	1	0.1445	0.197	0.3114	0.6491	0.8561	0.94785	0.9706	1	1	1	1
IESPGM.PTET51.1.112.227744	Early	1	1	0.9605	1	0.2978	0.2902	0.7133	0.8151	0.9103	0.98935	1	1	1	0.9804	1
IESPGM.PTET51.1.112.227814	Early	1	1	1	1	0.16385	0.2223	0.67135	0.8333	0.852	1	1	0.97825	1	1	1
IESPGM.PTET51.1.112.236543	Early	1	1	1	0.9904	0.12545	0.33565	0.59815	0.87365	0.8988	0.9629	0.9701	0.9896	1	1	1
IESPGM.PTET51.1.112.236721	Early	1	1	1	1	0.13855	0.1081	0.5458	0.77235	0.86235	0.97095	1	0.9692	1	0.9778	1
IESPGM.PTET51.1.112.243856	Early	1	1	0.977	1	0.08125	0.20105	0.83945	0.95335	1	0.9799	1	0.988	1	1	1
IESPGM.PTET51.1.112.248382	Early	0.9935	1	0.99125	1	0.0317499999999999	0.274	0.79115	0.8348	0.95045	1	0.98385	1	1	1	1
IESPGM.PTET51.1.112.249146	Early	1	1	1	1	0.12975	0.17925	0.6875	0.82035	0.98835	1	1	1	1	1	1
IESPGM.PTET51.1.112.250527	Early	1	1	0.99295	1	0.16355	0.3529	0.7699	0.82855	0.841	0.99275	1	0.99335	1	1	1
IESPGM.PTET51.1.112.25698	Early	1	1	1	1	0.23305	0.17265	0.4804	0.6467	0.8692	0.95	0.9885	1	0.9895	1	0.99455
IESPGM.PTET51.1.112.261772	Early	1	1	0.98685	0.9836	0.14645	0.2691	0.70175	0.82785	0.93985	0.96715	0.9535	1	1	1	1
IESPGM.PTET51.1.112.261990	Early	1	0.96	1	1	0.14435	0.1539	0.1905	0.41665	0.98915	0.98	0.9804	0.97725	1	1	0.9802
IESPGM.PTET51.1.112.263594	Early	1	1	1	1	0.15975	0.23285	0.7135	0.88895	0.94865	0.97825	1	0.99255	1	1	1
IESPGM.PTET51.1.112.266907	Early	1	1	1	0.9836	0.05725	0.2353	0.46585	0.56965	0.7123	0.8222	0.8639	0.9815	0.9607	0.9878	1
IESPGM.PTET51.1.112.288520	Early	1	0.96575	0.99505	1	0.24405	0.2234	0.4457	0.6676	0.93125	0.9735	0.9219	1	1	1	1
IESPGM.PTET51.1.112.29557	Early	0.9872	1	0.9814	1	0.1798	0.1818	0.32605	0.5076	0.74235	0.968	0.99255	1	1	0.9649	1
IESPGM.PTET51.1.112.30436	Early	1	0.95535	1	1	0.32705	0.3613	0.60425	0.6435	0.8384	0.9918	1	0.99375	1	1	1
IESPGM.PTET51.1.112.33963	Early	1	1	0.9909	1	0	0.1251	0.4796	0.7038	0.81135	0.9685	0.97745	1	1	1	0.99285
IESPGM.PTET51.1.112.35936	Early	1	1	1	1	0.1277	0.13745	0.69295	0.77955	0.95535	1	0.97095	1	1	1	1
IESPGM.PTET51.1.112.44374	Early	1	1	1	1	0.14755	0.23015	0.39405	0.58675	0.856	0.9023	1	1	0.9821	0.98835	0.9944
IESPGM.PTET51.1.112.50084	Early	1	0.9841	0.97035	1	0.13605	0.2553	0.39015	0.5867	0.6556	0.8517	0.90765	0.9768	0.99205	1	1
IESPGM.PTET51.1.112.52035	Early	1	1	1	1	0.18845	0.29315	0.70985	0.9511	0.87095	0.97715	1	1	0.9904	1	1
IESPGM.PTET51.1.112.53394	Early	1	0.9868	1	0.9889	0.2862	0.26095	0.59635	0.894	0.97815	0.95425	1	0.9936	1	1	1
IESPGM.PTET51.1.112.58427	Early	1	1	0.9944	0.9891	0.18195	0.2945	0.3649	0.78655	0.95835	0.9541	0.99365	1	1	1	0.99425
IESPGM.PTET51.1.112.61362	Early	1	1	1	0.9948	0.12535	0.14185	0.29065	0.6606	0.9494	0.9631	1	0.9939	0.99545	0.98915	1
IESPGM.PTET51.1.112.64559	Early	1	1	1	1	0.1552	0.12725	0.3765	0.53705	0.8379	0.9744	0.9643	1	1	1	0.99595
IESPGM.PTET51.1.112.6865	Early	1	1	0.99125	0.9818	0.21625	0.1637	0.51905	0.6978	0.877	0.97845	0.9634	0.98415	1	1	1
IESPGM.PTET51.1.112.78832	Early	0.9949	1	0.99205	1	0.0800000000000001	0.1474	0.559	0.7545	0.89265	0.97965	1	1	1	1	1
IESPGM.PTET51.1.112.81549	Early	1	1	0.9904	1	0.11555	0.3388	0.6996	0.78405	1	0.99055	1	1	1	1	1
IESPGM.PTET51.1.112.82094	Early	1	1	1	1	0.04125	0.1347	0.4279	0.6903	0.78845	0.8236	0.9423	0.99275	0.9833	1	1
IESPGM.PTET51.1.112.85155	Early	1	1	0.9565	1	0.12635	0.26935	0.4774	0.63725	0.88995	0.94635	1	0.97525	0.99285	1	1
IESPGM.PTET51.1.112.85530	Early	1	1	1	1	0.12435	0.1579	0.28115	0.54695	0.8986	0.9867	1	1	1	1	1
IESPGM.PTET51.1.112.9171	Early	1	1	1	1	0.0952	0.17655	0.4793	0.62565	0.88555	0.9534	0.97145	1	1	1	1
IESPGM.PTET51.1.112.9759	Early	1	1	1	1	0.12435	0.1844	0.2578	0.62985	0.80615	0.9273	0.9868	1	1	1	1
IESPGM.PTET51.1.112.97975	Early	1	1	1	0.97815	0.17995	0.1782	0.4557	0.8	0.88895	0.9878	0.99055	0.9889	0.99275	1	1
IESPGM.PTET51.1.113.103448	Early	1	1	1	0.9934	0.1233	0.1489	0.5568	0.7345	0.8565	0.9923	0.98505	1	1	1	1
IESPGM.PTET51.1.113.106532	Early	1	0.9818	1	0.99285	0.12385	0.1202	0.3796	0.71135	0.7788	0.91255	0.95905	0.9873	1	1	0.9857
IESPGM.PTET51.1.113.108206	Early	1	1	1	1	0.1905	0.1857	0.66045	0.79355	0.9146	0.9799	0.96665	0.97275	1	1	1
IESPGM.PTET51.1.113.112463	Early	1	1	1	1	0.24725	0.30495	0.53885	0.78865	0.91495	0.96115	0.98865	0.9762	0.99125	0.9815	0.9865
IESPGM.PTET51.1.113.113386	Early	1	1	0.9841	1	0.1064	0.1818	0.5645	0.7177	0.8476	0.97725	1	1	1	0.99265	1
IESPGM.PTET51.1.113.115964	Early	1	1	0.98185	0.9943	0.04765	0.0401	0.2687	0.5928	0.78055	0.9444	0.9273	0.9833	0.99375	1	1
IESPGM.PTET51.1.113.134146	Early	1	1	1	1	0.0741499999999999	0.30585	0.48625	0.6996	0.9528	0.9735	1	0.9818	0.9873	1	0.9946
IESPGM.PTET51.1.113.134970	Early	1	1	1	1	0.1693	0.26445	0.5293	0.6916	0.95895	0.9497	0.9835	1	0.988	0.98485	0.99585
IESPGM.PTET51.1.113.14143	Early	1	1	1	1	0.0556000000000001	0.15975	0.65305	0.8074	1	0.99195	1	1	1	1	1
IESPGM.PTET51.1.113.145062	Early	1	1	0.9788	1	0.1154	0.1748	0.48045	0.7736	0.9635	0.99385	0.99	0.9857	1	1	1
IESPGM.PTET51.1.113.151251	Early	1	1	0.9891	1	0.14215	0.16035	0.43275	0.68265	0.9376	0.9747	0.987	0.99205	1	1	1
IESPGM.PTET51.1.113.156488	Early	1	0.9891	0.98275	1	0.1716	0.19685	0.5969	0.8439	0.98765	1	1	0.99275	0.99425	1	1
IESPGM.PTET51.1.113.168532	Early	0.99445	0.97115	1	1	0.124	0.0507	0.38365	0.64805	0.7841	0.89685	0.92555	1	0.9923	1	1
IESPGM.PTET51.1.113.172507	Early	0.9885	1	0.9922	1	0.16025	0.15655	0.5135	0.6096	0.77045	0.95905	1	1	1	1	1
IESPGM.PTET51.1.113.175156	Early	1	1	0.99255	1	0.1044	0.1527	0.27645	0.6022	0.6885	0.96245	0.99385	1	1	1	1
IESPGM.PTET51.1.113.17712	Early	1	1	1	1	0.27715	0.2485	0.53705	0.8388	0.94315	0.99105	1	1	1	1	0.99425
IESPGM.PTET51.1.113.182319	Early	1	1	0.9914	1	0.08165	0.122	0.3702	0.54405	0.8167	0.89585	0.83135	0.9873	0.99265	1	1
IESPGM.PTET51.1.113.183794	Early	1	1	1	1	0.14465	0.15475	0.47685	0.87025	0.92425	0.99205	0.98505	1	1	1	0.99425
IESPGM.PTET51.1.113.185746	Early	1	1	0.97785	1	0.16755	0.2591	0.5543	0.81845	0.9923	1	0.9694	0.99075	1	1	1
IESPGM.PTET51.1.113.188482	Early	1	1	0.99255	1	0.16295	0.3447	0.7364	0.894	0.9464	0.9698	1	0.9922	1	1	0.99265
IESPGM.PTET51.1.113.189352	Early	1	1	0.9918	1	0.1699	0.2887	0.61255	0.81015	0.91405	1	0.9934	1	1	1	1
IESPGM.PTET51.1.113.195385	Early	1	1	1	1	0.19825	0.1846	0.3776	0.6042	0.8158	0.93215	0.9634	0.9802	1	1	1
IESPGM.PTET51.1.113.222049	Early	1	1	0.99195	1	0.1741	0.18575	0.468	0.7597	0.94085	0.9552	1	1	1	1	1
IESPGM.PTET51.1.113.226875	Early	1	1	1	0.9966	0.1222	0.2615	0.39315	0.62565	0.8728	0.9698	1	0.9941	0.99375	1	1
IESPGM.PTET51.1.113.228385	Early	1	0.99515	1	1	0.151	0.16075	0.66345	0.721	0.86625	0.97435	0.94025	0.9889	1	1	1
IESPGM.PTET51.1.113.239174	Early	1	1	1	1	0.1401	0.1845	0.4408	0.8305	0.994	1	1	0.9914	0.9935	1	1
IESPGM.PTET51.1.113.260184	Early	0.99475	1	0.99375	1	0.19675	0.2763	0.60245	0.8067	0.90595	0.99315	0.97685	1	1	1	1
IESPGM.PTET51.1.113.33725	Early	1	1	1	0.9877	0.13895	0.1809	0.36175	0.56785	0.86665	0.95105	0.98795	1	1	1	1
IESPGM.PTET51.1.113.40540	Early	1	1	1	1	0.06165	0.3222	0.66365	0.8068	0.9294	1	1	1	0.9934	1	1
IESPGM.PTET51.1.113.47621	Early	1	1	0.9857	1	0.1823	0.05515	0.34915	0.693	0.88165	0.99385	0.9656	1	0.99335	1	0.99295
IESPGM.PTET51.1.113.47832	Early	1	1	0.99125	1	0.0404	0.22275	0.58945	0.734	0.98075	0.98215	0.96455	1	1	1	1
IESPGM.PTET51.1.113.49614	Early	1	1	1	1	0.3433	0.24525	0.6883	0.8739	0.9574	1	1	0.9902	1	1	1
IESPGM.PTET51.1.113.54706	Early	0.9865	1	1	0.99375	0.1058	0.20655	0.42835	0.73545	0.8606	0.9294	1	0.9836	0.99055	1	0.99385
IESPGM.PTET51.1.113.55397	Early	1	1	0.9846	1	0.24245	0.1854	0.7119	0.76975	0.94485	0.9796	1	1	1	1	0.9899
IESPGM.PTET51.1.113.62078	Early	1	1	0.9768	0.99455	0.12975	0.15625	0.5966	0.78055	0.962	0.9645	1	1	0.99385	1	1
IESPGM.PTET51.1.113.62308	Early	1	1	0.99325	1	0.1412	0.14285	0.2609	0.51245	0.8195	0.901	0.9923	1	1	0.9825	1
IESPGM.PTET51.1.113.70306	Early	1	1	0.98215	1	0.0791999999999999	0.094	0.3429	0.6268	0.9423	0.90025	0.954	1	0.9914	1	1
IESPGM.PTET51.1.113.70339	Early	1	1	0.9857	1	0.1334	0.1305	0.52335	0.68385	0.85275	0.889	1	1	0.9846	1	1
IESPGM.PTET51.1.113.74282	Early	1	1	1	1	0.275	0.2121	0.54555	0.66715	0.9118	0.94745	1	1	1	1	1
IESPGM.PTET51.1.113.74502	Early	1	1	1	1	0.16165	0.1941	0.53045	0.71485	0.9604	0.9754	0.9924	0.9841	1	1	0.995
IESPGM.PTET51.1.113.8125	Early	1	1	0.9811	1	0.08975	0.1552	0.378	0.49305	0.82355	0.9439	1	1	0.99195	1	1
IESPGM.PTET51.1.113.82557	Early	1	1	1	1	0.0528999999999999	0.07285	0.299	0.65695	0.7959	0.97305	0.92205	1	1	1	1
IESPGM.PTET51.1.113.82588	Early	1	1	0.99425	1	0.2783	0.28905	0.5859	0.88235	0.96545	0.9831	1	1	1	1	1
IESPGM.PTET51.1.113.89453	Early	1	1	1	1	0.1202	0.20395	0.7109	0.85315	0.97035	0.9846	0.98875	1	1	1	1
IESPGM.PTET51.1.113.92694	Early	1	1	0.99295	0.9783	0.0378000000000001	0.0952	0.4462	0.623	0.72895	0.9027	0.9804	0.9735	0.9844	1	1
IESPGM.PTET51.1.113.92946	Early	1	1	0.9872	1	0.1514	0.2117	0.5305	0.80385	0.91215	0.9756	0.9706	0.99285	0.99255	1	1
IESPGM.PTET51.1.113.93590	Early	1	1	0.9846	1	0.1347	0.2198	0.42435	0.65985	0.96095	0.9524	1	1	1	1	1
IESPGM.PTET51.1.114.101386	Early	1	1	1	0.98095	0.15735	0.22635	0.25545	0.52805	0.7947	0.9085	0.9614	1	1	0.98	1
IESPGM.PTET51.1.114.101463	Early	1	1	1	1	0.1619	0.3303	0.5771	0.88745	0.8964	0.987	0.9863	0.9855	1	1	1
IESPGM.PTET51.1.114.101864	Early	1	1	1	0.9949	0.0606	0.2301	0.5199	0.7634	0.95775	0.9759	1	1	1	1	1
IESPGM.PTET51.1.114.10768	Early	1	0.99295	0.97315	1	0.10625	0.2087	0.4943	0.76665	0.9064	0.94535	0.99455	0.99195	1	1	1
IESPGM.PTET51.1.114.107768	Early	1	1	0.99335	0.9911	0.12515	0.1447	0.2326	0.6027	0.77095	0.9125	0.97945	0.9765	1	0.98335	0.9918
IESPGM.PTET51.1.114.111115	Early	1	1	1	0.9886	0.09045	0.33375	0.4695	0.64235	0.66595	0.876	0.90085	0.99105	0.99455	1	1
IESPGM.PTET51.1.114.11176	Early	1	1	1	1	0.238	0.34545	0.6729	0.82935	0.87775	0.98665	1	1	1	1	1
IESPGM.PTET51.1.114.11513	Early	1	1	0.9873	1	0.1096	0.15395	0.2246	0.61595	0.7663	0.94495	1	1	1	1	1
IESPGM.PTET51.1.114.120428	Early	1	1	1	1	0.1676	0.40005	0.5619	0.7273	0.80655	0.9737	0.8966	0.9768	1	1	0.9882
IESPGM.PTET51.1.114.121135	Early	1	1	1	1	0.0808	0.2686	0.49055	0.876	0.9225	0.9875	0.9651	1	1	1	1
IESPGM.PTET51.1.114.122198	Early	1	1	0.9846	1	0.3045	0.2912	0.68175	0.78515	0.9334	0.9289	1	1	1	1	1
IESPGM.PTET51.1.114.131213	Early	1	1	1	1	0.08905	0.14145	0.2951	0.5091	0.8522	0.8867	0.98075	0.98865	1	1	1
IESPGM.PTET51.1.114.137980	Early	1	1	1	1	0.3078	0.33745	0.6148	0.7517	0.9667	0.9722	1	0.98	0.99285	1	1
IESPGM.PTET51.1.114.138090	Early	1	1	0.9878	1	0.07465	0.3621	0.68755	0.7836	0.96795	0.95315	1	1	1	1	0.9939
IESPGM.PTET51.1.114.140120	Early	1	0.9758	1	1	0.17005	0.20025	0.42305	0.69645	0.6933	0.82815	0.7502	1	0.9633	1	0.99265
IESPGM.PTET51.1.114.143748	Early	1	1	1	1	0.06775	0.10425	0.49165	0.7592	0.93075	0.99125	1	0.9909	0.9865	1	1
IESPGM.PTET51.1.114.145433	Early	1	0.99165	0.9799	1	0.0718	0.06915	0.2877	0.69415	0.6964	0.90405	1	0.91955	0.99365	1	0.9878
IESPGM.PTET51.1.114.147985	Early	1	1	1	1	0.16665	0.2523	0.61755	0.66625	0.889	0.99285	1	1	1	1	1
IESPGM.PTET51.1.114.151653	Early	1	1	1	1	0.1697	0.3125	0.70525	0.8965	0.9787	0.9888	1	1	1	1	1
IESPGM.PTET51.1.114.156130	Early	1	1	0.97905	1	0.0530999999999999	0.18115	0.38045	0.6872	0.7728	0.95	0.951	1	1	1	1
IESPGM.PTET51.1.114.158702	Early	1	1	0.9882	1	0.12505	0.18765	0.49335	0.8082	0.9211	0.96945	0.93675	1	0.9807	1	1
IESPGM.PTET51.1.114.159508	Early	1	0.9875	0.99265	1	0.20485	0.11025	0.3743	0.68065	0.7349	0.92805	0.9121	0.9724	1	0.98915	1
IESPGM.PTET51.1.114.160234	Early	0.9945	1	1	1	0.158	0.2849	0.6093	0.65445	0.9265	0.9538	0.98215	0.98835	1	1	0.99295
IESPGM.PTET51.1.114.165724	Early	1	1	0.98415	1	0.1213	0.185	0.4336	0.7136	0.833	0.9269	0.99105	1	1	1	1
IESPGM.PTET51.1.114.168658	Early	1	1	0.96185	1	0.16115	0.35085	0.36665	0.688	0.79845	0.95905	0.95875	0.98215	0.9857	1	0.9945
IESPGM.PTET51.1.114.182205	Early	1	1	0.9909	1	0.0839	0.3442	0.558	0.73985	0.94635	1	1	0.9841	1	1	1
IESPGM.PTET51.1.114.184371	Early	1	1	1	0.9907	0.14555	0.1873	0.6918	0.8572	0.9481	0.9923	1	1	1	1	1
IESPGM.PTET51.1.114.186580	Early	1	1	0.97965	0.99475	0.137	0.20485	0.3937	0.7059	0.8437	0.9626	0.9737	0.9935	1	1	1
IESPGM.PTET51.1.114.186643	Early	1	1	1	1	0.1531	0.3136	0.53605	0.8169	0.77785	0.99195	1	1	1	1	1
IESPGM.PTET51.1.114.19008	Early	1	1	0.97415	1	0.1575	0.11435	0.31655	0.613	0.8527	0.91935	0.9511	0.99315	1	0.99105	0.99475
IESPGM.PTET51.1.114.191161	Early	1	1	1	1	0.06525	0.29955	0.62	0.8867	0.9407	0.9923	1	0.99275	1	1	1
IESPGM.PTET51.1.114.193589	Early	1	1	0.99325	0.99485	0.25035	0.2386	0.7761	0.87525	1	0.96665	1	1	1	1	1
IESPGM.PTET51.1.114.210001	Early	1	1	1	1	0.09285	0.1166	0.50215	0.64915	0.8003	0.9706	0.9863	0.99105	0.9853	1	0.99455
IESPGM.PTET51.1.114.211096	Early	1	1	1	1	0.165	0.16555	0.5278	0.86695	0.8979	0.9867	0.98525	1	0.9851	1	1
IESPGM.PTET51.1.114.213421	Early	1	0.9914	1	0.99105	0.1468	0.275	0.4934	0.6218	0.8739	0.93525	0.9798	0.9855	1	1	1
IESPGM.PTET51.1.114.216179	Early	1	1	1	1	0.1523	0.1154	0.389	0.71325	0.7953	0.95675	0.9289	0.99195	1	0.99195	1
IESPGM.PTET51.1.114.216959	Early	1	1	0.9722	1	0.13015	0.24795	0.62145	0.77675	0.90455	0.9855	0.9524	1	0.99475	1	1
IESPGM.PTET51.1.114.220949	Early	1	1	1	1	0.13595	0.2796	0.6606	0.7673	0.8817	0.9571	1	1	0.9483	1	1
IESPGM.PTET51.1.114.223282	Early	1	1	0.96895	1	0.1957	0.3323	0.6621	0.9019	0.97415	0.9839	0.9844	0.99405	1	0.99125	0.9961
IESPGM.PTET51.1.114.22407	Early	1	0.98295	0.9756	1	0.251	0.27285	0.6621	0.8896	0.89095	0.9746	0.9918	1	0.9836	1	1
IESPGM.PTET51.1.114.230720	Early	1	1	0.98295	0.9923	0.1942	0.30535	0.6623	0.8869	0.96555	0.95545	0.9846	1	1	0.99105	1
IESPGM.PTET51.1.114.231346	Early	1	1	1	1	0.2241	0.24455	0.6791	0.8018	0.9392	0.9836	0.97015	1	0.99295	0.98865	1
IESPGM.PTET51.1.114.234410	Early	0.9825	1	0.9821	1	0.1539	0.2232	0.5795	0.73745	0.877	0.97565	0.975	1	0.9818	1	1
IESPGM.PTET51.1.114.236021	Early	1	0.9875	1	0.9818	0	0.11845	0.75715	0.8248	0.9896	0.9737	1	1	1	1	0.99475
IESPGM.PTET51.1.114.241163	Early	1	1	1	1	0.11445	0.14405	0.4714	0.57395	0.93955	0.95545	1	0.99055	1	1	1
IESPGM.PTET51.1.114.243274	Early	1	1	0.9939	1	0.05725	0.14835	0.42195	0.7917	0.8977	0.9526	0.9807	1	0.9865	0.9825	1
IESPGM.PTET51.1.114.245223	Early	1	1	1	1	0.0266500000000001	0.1786	0.4604	0.5595	0.7648	0.95	0.8381	1	0.9934	1	0.995
IESPGM.PTET51.1.114.252756	Early	1	1	1	1	0.165	0.15165	0.45755	0.6664	0.81935	0.95485	0.88595	0.9745	1	1	1
IESPGM.PTET51.1.114.260640	Early	1	1	0.9827	1	0.20715	0.31245	0.48295	0.75	0.92755	0.9799	0.99265	0.9936	1	1	1
IESPGM.PTET51.1.114.262010	Early	1	1	1	1	0.15915	0.2041	0.7972	0.92825	0.96015	0.96455	1	1	1	1	1
IESPGM.PTET51.1.114.266766	Early	1	1	1	1	0.1392	0.32455	0.38605	0.63715	0.69415	0.86695	0.8828	0.974	1	1	1
IESPGM.PTET51.1.114.269529	Early	1	1	0.99125	1	0.14425	0.14775	0.54475	0.7817	0.9162	1	1	1	1	1	1
IESPGM.PTET51.1.114.26988	Early	1	1	1	1	0.1348	0.1782	0.57545	0.84475	0.91955	0.99125	0.99165	0.9818	0.9922	1	1
IESPGM.PTET51.1.114.274755	Early	1	1	0.99365	0.9943	0.13725	0.3159	0.71015	0.79725	0.9753	1	1	1	0.9583	1	1
IESPGM.PTET51.1.114.275198	Early	1	1	1	1	0.16115	0.0678	0.3909	0.61535	0.8718	0.9177	1	1	1	1	1
IESPGM.PTET51.1.114.276237	Early	0.975	0.99365	1	1	0.1702	0.24365	0.4235	0.67455	0.8838	0.894	1	0.97965	1	1	0.98875
IESPGM.PTET51.1.114.278560	Early	1	1	0.97875	1	0.05	0.07335	0.27395	0.64785	0.7295	0.9706	1	1	1	1	1
IESPGM.PTET51.1.114.283261	Early	1	0.98305	1	1	0.15265	0.22935	0.4082	0.54495	0.85565	0.9427	1	1	1	1	1
IESPGM.PTET51.1.114.292071	Early	1	1	0.9863	1	0.2553	0.2756	0.74445	0.75735	0.88505	0.95025	1	1	1	1	1
IESPGM.PTET51.1.114.29683	Early	1	1	1	1	0.18825	0.36975	0.7175	0.8131	0.86605	0.9683	0.9349	1	0.9886	1	0.98495
IESPGM.PTET51.1.114.31052	Early	1	1	0.99195	0.9821	0.1054	0.1297	0.3253	0.73055	0.81835	0.9613	0.9692	1	1	1	1
IESPGM.PTET51.1.114.33494	Early	1	1	1	0.9873	0.1307	0.2668	0.6595	0.72855	0.7877	0.99055	0.99365	1	0.9828	1	1
IESPGM.PTET51.1.114.42723	Early	1	0.99155	1	1	0.1676	0.1831	0.43165	0.66295	0.7914	0.9934	0.92645	0.98835	1	1	1
IESPGM.PTET51.1.114.52784	Early	1	1	1	1	0.0728500000000001	0.19055	0.75	0.81315	0.94265	0.9655	0.98235	1	0.99125	1	0.9897
IESPGM.PTET51.1.114.53740	Early	1	1	1	1	0.0531999999999999	0.2154	0.7608	0.86975	0.94125	1	1	1	1	1	1
IESPGM.PTET51.1.114.65334	Early	1	1	0.9661	1	0.0626	0.17915	0.4606	0.5691	0.82305	0.93745	0.9875	0.9939	0.9706	1	1
IESPGM.PTET51.1.114.77855	Early	1	0.9943	1	1	0.0992999999999999	0.01805	0.31525	0.8113	0.83385	0.99285	1	1	1	1	1
IESPGM.PTET51.1.114.78259	Early	1	1	1	1	0.17755	0.08895	0.3589	0.53895	0.83975	0.955	0.9333	0.9773	1	1	1
IESPGM.PTET51.1.114.8025	Early	1	0.9716	1	1	0.16085	0.1497	0.44225	0.61485	0.892	0.93045	0.9186	0.9961	0.9963	1	1
IESPGM.PTET51.1.114.87207	Early	1	1	1	1	0.1297	0.30505	0.8117	0.8435	0.9787	0.99275	1	1	1	1	1
IESPGM.PTET51.1.114.93554	Early	1	1	0.9942	1	0.14315	0.22885	0.335	0.5047	0.69235	0.94305	0.9667	0.9863	0.99515	1	0.99
IESPGM.PTET51.1.114.95596	Early	0.99405	1	0.9872	0.9949	0.19375	0.14585	0.35125	0.6303	0.7821	0.93515	0.9159	0.9936	0.9955	0.99125	0.9953
IESPGM.PTET51.1.114.96311	Early	1	1	1	1	0.22245	0.24765	0.5005	0.78235	0.8882	0.9204	1	1	1	1	0.9825
IESPGM.PTET51.1.114.96433	Early	1	1	0.9851	1	0.23735	0.36735	0.4886	0.64615	0.9362	1	1	1	1	1	1
IESPGM.PTET51.1.115.108194	Early	1	1	0.99205	1	0.1212	0.21605	0.73775	0.94855	0.98075	1	1	1	1	1	1
IESPGM.PTET51.1.115.109617	Early	1	1	1	1	0.1311	0.27895	0.7978	0.8503	0.97465	0.99315	1	1	1	1	1
IESPGM.PTET51.1.115.117161	Early	1	1	0.9922	1	0.1621	0.28955	0.678	0.8599	0.9224	0.9825	0.97825	0.9828	0.9821	1	1
IESPGM.PTET51.1.115.121542	Early	1	1	0.99315	0.9762	0.09485	0.18615	0.5882	0.7744	0.89455	0.97205	0.9859	1	1	1	1
IESPGM.PTET51.1.115.129624	Early	1	1	0.95015	0.99535	0.2609	0.22805	0.55065	0.7576	0.82105	0.94625	0.97725	0.9936	0.96925	1	0.97705
IESPGM.PTET51.1.115.136513	Early	1	1	0.99275	1	0.1356	0.17145	0.47015	0.76435	0.9255	0.994	1	0.99265	1	0.9811	0.99495
IESPGM.PTET51.1.115.143012	Early	1	1	0.969	1	0.23735	0.2182	0.76665	0.9118	0.98835	1	1	0.9941	1	1	1
IESPGM.PTET51.1.115.144356	Early	1	1	0.9855	1	0.124	0.13445	0.3137	0.5334	0.7985	0.83025	0.9167	0.99	1	1	1
IESPGM.PTET51.1.115.146684	Early	1	1	0.99205	1	0.0556	0.08815	0.3763	0.55725	0.841	0.9846	0.9868	0.9898	0.9944	1	0.9885
IESPGM.PTET51.1.115.148145	Early	1	1	1	1	0.0709500000000001	0.3235	0.69235	0.7471	0.95655	0.9868	1	1	1	1	1
IESPGM.PTET51.1.115.164948	Early	0.9861	1	1	1	0.0527	0.09095	0.3855	0.64365	0.7564	0.9388	0.98	1	0.9859	1	1
IESPGM.PTET51.1.115.170527	Early	1	1	0.9839	0.98115	0.16695	0.1936	0.5194	0.73005	0.8286	0.9857	0.9468	1	1	1	1
IESPGM.PTET51.1.115.171718	Early	1	1	1	0.9756	0.1539	0.3377	0.582	0.8182	0.9348	0.97725	1	1	1	1	1
IESPGM.PTET51.1.115.174104	Early	1	1	0.99255	1	0.1199	0.22875	0.3897	0.5939	0.83105	0.9482	0.98215	0.9875	0.99325	1	1
IESPGM.PTET51.1.115.174463	Early	1	0.9746	0.99075	1	0.11325	0.1985	0.3531	0.60055	0.704	0.8571	0.88595	0.98115	0.9792	1	1
IESPGM.PTET51.1.115.178669	Early	1	1	1	1	0.1001	0.17525	0.57505	0.8047	0.93215	0.9175	1	1	1	0.98835	1
IESPGM.PTET51.1.115.180873	Early	1	1	0.99425	0.99075	0.0645	0.1266	0.3247	0.6778	0.963	0.99125	0.98335	1	1	1	1
IESPGM.PTET51.1.115.184478	Early	1	0.99	0.9877	0.9877	0.22035	0.21385	0.4905	0.754	0.96745	0.9608	1	1	1	1	1
IESPGM.PTET51.1.115.190610	Early	1	0.9904	0.99325	1	0.10395	0.13875	0.33005	0.4109	0.83635	0.9878	0.9269	1	1	1	1
IESPGM.PTET51.1.115.199573	Early	1	1	0.99325	1	0.20915	0.2812	0.62355	0.66785	0.809	0.97045	1	0.9872	0.9947	1	1
IESPGM.PTET51.1.115.202681	Early	1	1	1	1	0.18205	0.1901	0.40725	0.6	0.79395	0.92755	0.87395	1	0.9855	1	1
IESPGM.PTET51.1.115.209436	Early	1	1	1	1	0.144	0.1539	0.5198	0.55055	0.91445	0.9646	0.92475	1	0.9718	1	1
IESPGM.PTET51.1.115.209830	Early	1	0.9444	0.9848	1	0.2013	0.14425	0.26975	0.49935	0.81795	0.9504	0.99525	0.9882	1	1	1
IESPGM.PTET51.1.115.210378	Early	1	1	1	1	0.285	0.3902	0.63875	0.8605	0.9716	0.9914	1	1	1	1	1
IESPGM.PTET51.1.115.217543	Early	1	1	0.9859	1	0.18575	0.30145	0.624	0.84505	0.97825	0.9851	1	1	0.9853	1	1
IESPGM.PTET51.1.115.217816	Early	1	1	0.99285	1	0.20075	0.2375	0.3017	0.60735	0.8191	0.9353	0.8333	0.9839	1	1	1
IESPGM.PTET51.1.115.219578	Early	1	1	1	1	0.15895	0.1675	0.5079	0.71895	0.5871	0.9293	0.9661	0.99	0.99055	1	0.96735
IESPGM.PTET51.1.115.224560	Early	1	1	0.9902	1	0.12285	0.0843	0.3913	0.78175	0.8113	0.9273	0.8762	1	1	1	1
IESPGM.PTET51.1.115.227281	Early	1	1	0.9844	1	0.1482	0.24285	0.84865	0.8545	0.9506	1	0.9728	1	1	1	0.995
IESPGM.PTET51.1.115.228691	Early	1	1	1	0.99125	0.1026	0.0698	0.36495	0.4968	0.81485	0.8771	1	1	1	1	1
IESPGM.PTET51.1.115.229737	Early	1	0.974	1	1	0.2083	0.11805	0.51915	0.70835	0.80235	0.9643	0.96275	0.9833	1	1	0.9949
IESPGM.PTET51.1.115.233978	Early	1	1	1	1	0.0871	0.3712	0.5217	0.7917	0.95605	1	1	1	1	1	1
IESPGM.PTET51.1.115.236595	Early	1	1	1	1	0.2386	0.0976	0.3263	0.50965	0.7881	0.9231	0.989	1	0.9853	1	1
IESPGM.PTET51.1.115.237547	Early	1	1	1	1	0.2041	0.305	0.6898	0.7736	0.92725	0.9576	0.9559	1	0.99385	1	0.9914
IESPGM.PTET51.1.115.238480	Early	1	1	0.9935	1	0.1765	0.20215	0.42765	0.7073	0.71165	0.9537	0.8171	0.9881	1	1	1
IESPGM.PTET51.1.115.239392	Early	1	1	0.99455	1	0.2157	0.31985	0.69425	0.8194	0.9399	0.99105	0.9719	1	1	1	1
IESPGM.PTET51.1.115.241711	Early	1	1	0.99315	1	0.13835	0.274	0.4511	0.6818	0.9343	0.99155	0.96745	0.9942	1	1	1
IESPGM.PTET51.1.115.243491	Early	1	1	0.99375	1	0	0.3088	0.6148	0.78055	0.99195	1	0.99365	1	0.9918	1	0.9894
IESPGM.PTET51.1.115.245341	Early	1	1	1	1	0.04	0.1225	0.58515	0.92025	0.9636	1	0.99205	1	1	1	1
IESPGM.PTET51.1.115.250651	Early	1	1	1	1	0.15915	0.32775	0.74195	0.8418	1	0.9918	1	1	1	1	1
IESPGM.PTET51.1.115.254842	Early	1	1	0.9768	1	0.04915	0.03935	0.4337	0.71085	0.81235	0.97445	0.9444	1	1	1	0.99515
IESPGM.PTET51.1.115.258599	Early	1	1	0.9875	1	0.2258	0.16345	0.6872	0.90965	0.98685	0.9935	1	1	1	1	1
IESPGM.PTET51.1.115.260203	Early	1	1	1	1	0.2244	0.1154	0.4224	0.5939	0.74085	0.9716	0.9796	0.98115	0.99325	1	0.9894
IESPGM.PTET51.1.115.261427	Early	1	1	0.9895	1	0.3039	0.1379	0.3629	0.549	0.7354	0.9783	1	1	1	1	1
IESPGM.PTET51.1.115.27982	Early	1	1	1	1	0.20945	0.18465	0.6338	0.7429	0.87475	0.9665	1	0.973	1	1	1
IESPGM.PTET51.1.115.42223	Early	1	1	1	0.9815	0.1225	0.11235	0.45805	0.8403	0.9583	0.9827	1	0.9844	0.9941	1	1
IESPGM.PTET51.1.115.42234	Early	1	0.9918	1	0.99155	0.18365	0.1927	0.47425	0.7333	0.9861	0.9868	1	0.9863	1	1	1
IESPGM.PTET51.1.115.45489	Early	1	1	1	1	0.0216499999999999	0.0426	0.60675	0.8446	1	1	1	1	1	1	1
IESPGM.PTET51.1.115.5501	Early	1	1	0.99315	0.9939	0.2132	0.1318	0.2978	0.61195	0.76575	0.92315	0.97265	0.9886	1	0.9914	1
IESPGM.PTET51.1.115.70373	Early	1	1	0.9853	1	0.16025	0.2979	0.5577	0.67555	0.82575	0.8673	0.9636	1	0.9873	0.9815	1
IESPGM.PTET51.1.115.88899	Early	1	0.98	0.9922	1	0.1538	0.30205	0.56165	0.6835	0.7643	0.93985	0.9689	0.97935	1	1	1
IESPGM.PTET51.1.115.91682	Early	1	1	0.9886	1	0.15715	0.26135	0.58615	0.89515	0.9556	0.99285	1	0.99295	1	1	1
IESPGM.PTET51.1.116.100774	Early	1	1	1	1	0.16965	0.2857	0.438	0.69505	0.9012	0.94745	0.9944	0.9897	0.9804	1	0.9947
IESPGM.PTET51.1.116.104882	Early	1	1	0.9722	1	0.12155	0.0617	0.2098	0.4543	0.88275	0.97725	1	0.99535	1	1	1
IESPGM.PTET51.1.116.105457	Early	1	1	1	1	0.0861000000000001	0.1654	0.54465	0.6898	0.96005	0.94155	0.9881	1	1	1	1
IESPGM.PTET51.1.116.105894	Early	1	1	0.99125	0.99325	0.1058	0.0803	0.38045	0.64985	0.7367	0.8859	0.9503	0.9847	1	1	0.99105
IESPGM.PTET51.1.116.106719	Early	1	1	0.99385	1	0.3654	0.3348	0.62565	0.7262	0.8814	0.97965	0.98585	1	0.9643	1	1
IESPGM.PTET51.1.116.107027	Early	1	1	1	0.98935	0.0762	0.2706	0.47375	0.78325	0.8371	0.98245	0.99535	0.9933	1	1	1
IESPGM.PTET51.1.116.112277	Early	1	1	0.9722	1	0.1922	0.2036	0.6398	0.8835	0.9695	0.968	1	0.9965	1	1	0.99485
IESPGM.PTET51.1.116.113704	Early	1	1	0.9833	1	0.2124	0.33635	0.615	0.8384	0.94935	0.9831	1	1	1	1	1
IESPGM.PTET51.1.116.115793	Early	1	1	0.9918	1	0.14425	0.10515	0.3546	0.6739	0.8089	1	0.9947	0.9869	0.9885	0.99265	0.99335
IESPGM.PTET51.1.116.115961	Early	1	1	0.99155	0.9894	0.0710500000000001	0.30225	0.63985	0.81935	0.90045	0.95585	1	1	1	1	0.99455
IESPGM.PTET51.1.116.123708	Early	1	1	1	1	0.11265	0.1461	0.48875	0.59925	0.71415	0.88755	0.91205	0.99535	1	1	1
IESPGM.PTET51.1.116.126089	Early	1	1	0.99055	1	0.0455000000000001	0.08095	0.3684	0.5954	0.8693	0.9633	0.9807	1	1	1	1
IESPGM.PTET51.1.116.128682	Early	1	1	0.9857	1	0.11715	0.176	0.5962	0.6066	0.88705	0.99265	0.9939	1	1	1	1
IESPGM.PTET51.1.116.133243	Early	1	1	1	1	0.225	0.2942	0.6526	0.91855	1	0.99125	0.9869	1	1	1	1
IESPGM.PTET51.1.116.142884	Early	1	1	0.99205	1	0.11675	0.07475	0.25575	0.65455	0.8422	0.9586	0.9946	0.986	0.9947	0.9909	0.9939
IESPGM.PTET51.1.116.147869	Early	1	1	1	1	0.18365	0.254	0.7071	0.64245	0.92445	0.97815	0.9956	1	1	1	1
IESPGM.PTET51.1.116.152040	Early	1	1	0.99325	0.9831	0.1561	0.22525	0.36715	0.6362	0.76365	0.93165	0.9554	1	1	1	1
IESPGM.PTET51.1.116.154916	Early	1	1	0.9768	1	0.1835	0.2414	0.46245	0.7789	0.87975	1	0.9958	1	1	1	1
IESPGM.PTET51.1.116.156623	Early	1	1	0.9904	1	0.1818	0.1798	0.62025	0.71725	0.9468	0.9846	1	0.98935	1	1	0.9955
IESPGM.PTET51.1.116.159435	Early	1	1	1	1	0.1496	0.1802	0.38345	0.64995	0.80545	0.9831	0.9774	0.9919	0.99385	1	0.9963
IESPGM.PTET51.1.116.161981	Early	1	1	1	1	0.13345	0.18335	0.6092	0.7408	0.83995	0.9571	0.97805	1	0.9892	1	0.9909
IESPGM.PTET51.1.116.169149	Early	1	1	1	1	0.0650999999999999	0.1653	0.37035	0.7619	0.8757	1	0.99695	0.983	1	1	1
IESPGM.PTET51.1.116.170228	Early	1	0.99155	0.99255	1	0.1862	0.16235	0.41025	0.62815	0.8308	0.9634	0.99095	1	1	0.9875	1
IESPGM.PTET51.1.116.171793	Early	1	1	1	1	0.12915	0.4204	0.49785	0.74255	0.91675	0.9923	0.9914	0.9941	1	1	1
IESPGM.PTET51.1.116.177237	Early	1	1	0.97305	1	0.29465	0.24805	0.36225	0.65235	0.7488	0.91635	0.99795	0.98895	0.99275	1	1
IESPGM.PTET51.1.116.191446	Early	1	1	0.99205	1	0.2332	0.22115	0.60865	0.78055	0.9043	0.94745	0.9822	0.9968	1	1	0.9898
IESPGM.PTET51.1.116.192733	Early	1	1	1	1	0.099	0.0607	0.55125	0.65435	0.81155	0.9538	0.9814	0.9939	0.9914	1	1
IESPGM.PTET51.1.116.193662	Early	1	0.99105	0.9749	1	0.08775	0.2171	0.43215	0.72525	0.8475	0.95485	0.98525	1	0.9875	1	1
IESPGM.PTET51.1.116.195888	Early	1	1	1	1	0.02515	0.08125	0.5997	0.7896	0.9063	0.93585	0.9667	0.99535	1	1	1
IESPGM.PTET51.1.116.197580	Early	1	1	0.9902	1	0.26165	0.2912	0.6662	0.783	0.99335	0.9865	0.9943	0.9896	1	1	0.99315
IESPGM.PTET51.1.116.208088	Early	1	1	0.99055	1	0.208	0.3142	0.73225	0.85045	0.81695	0.9593	1	0.9924	1	1	1
IESPGM.PTET51.1.116.211906	Early	0.9974	0.98305	0.99365	1	0.1877	0.15275	0.308	0.6364	0.82675	0.96505	0.97185	0.9942	0.975	1	1
IESPGM.PTET51.1.116.213085	Early	1	1	0.9841	1	0.1264	0.2432	0.5426	0.77415	0.87605	0.95245	0.9626	0.9926	1	1	0.9903
IESPGM.PTET51.1.116.216889	Early	1	1	1	1	0.1325	0.17325	0.5444	0.70955	0.9505	0.96175	1	0.9959	1	1	1
IESPGM.PTET51.1.116.218587	Early	1	1	0.9888	0.99335	0.1548	0.19825	0.3054	0.66535	0.81025	0.96355	0.97895	0.9964	0.9768	1	1
IESPGM.PTET51.1.116.219307	Early	1	0.99275	0.9863	0.9941	0.13095	0.26355	0.4759	0.734	0.9259	0.9712	0.9976	0.99605	1	1	0.98705
IESPGM.PTET51.1.116.219432	Early	0.9974	1	0.99055	1	0.13995	0.18205	0.5883	0.66715	0.9445	0.97875	0.9962	1	1	1	1
IESPGM.PTET51.1.116.224796	Early	1	0.9914	0.9875	1	0.0911	0.16285	0.31125	0.57695	0.91215	0.9093	0.99715	0.98485	1	1	1
IESPGM.PTET51.1.116.227155	Early	1	1	0.99295	1	0.0166500000000001	0.1525	0.50075	0.8448	0.9802	1	1	0.9907	1	1	1
IESPGM.PTET51.1.116.235924	Early	1	0.9857	1	1	0.22255	0.3903	0.65385	0.8667	0.9375	0.9184	0.9876	0.9785	1	1	1
IESPGM.PTET51.1.116.236107	Early	1	1	0.9872	1	0.2223	0.3614	0.62655	0.83665	0.83165	1	0.9615	0.99485	1	1	0.99315
IESPGM.PTET51.1.116.237067	Early	1	1	1	1	0.15235	0.11105	0.4233	0.76805	0.97255	0.9802	0.9973	1	1	1	0.99375
IESPGM.PTET51.1.116.243471	Early	1	1	1	1	0.1088	0.3252	0.46055	0.7044	0.88145	0.97315	1	1	0.9892	1	1
IESPGM.PTET51.1.116.244165	Early	1	1	1	1	0.16395	0.20215	0.46675	0.7568	0.89235	0.97815	1	0.99635	1	1	1
IESPGM.PTET51.1.116.246203	Early	1	1	0.9878	1	0.14565	0.11115	0.66675	0.82815	0.9592	0.9909	1	0.9949	1	1	1
IESPGM.PTET51.1.116.249899	Early	1	1	1	1	0.0629500000000001	0.17945	0.6296	0.7824	0.8705	0.9392	0.92015	1	1	1	1
IESPGM.PTET51.1.116.251389	Early	1	1	0.98415	0.99305	0.08125	0.25555	0.56825	0.78905	0.97125	0.9902	1	1	1	1	1
IESPGM.PTET51.1.116.257369	Early	1	1	0.98025	1	0.2291	0.1575	0.44735	0.64995	0.64205	0.84935	0.9364	0.97085	0.98665	0.9811	1
IESPGM.PTET51.1.116.258034	Early	1	1	0.99485	1	0.1594	0.11435	0.50005	0.74215	0.9186	0.97855	1	0.9968	1	0.9818	1
IESPGM.PTET51.1.116.261530	Early	0.99735	1	0.99295	1	0.2291	0.2391	0.58875	0.9106	0.96335	1	1	1	1	1	1
IESPGM.PTET51.1.116.263527	Early	1	1	0.9863	1	0.23475	0.31705	0.62725	0.768	0.9612	1	0.9899	1	1	1	1
IESPGM.PTET51.1.116.265773	Early	1	0.9615	1	1	0.16735	0.2259	0.41635	0.6325	0.7986	0.9851	0.91155	0.993	1	1	1
IESPGM.PTET51.1.116.267950	Early	1	0.9904	1	0.9946	0.13315	0.33315	0.55885	0.72955	0.9643	0.9851	1	1	1	1	1
IESPGM.PTET51.1.116.290172	Early	1	1	0.99125	1	0.2152	0.10725	0.3458	0.62295	0.80975	0.9565	0.9835	1	0.98875	1	1
IESPGM.PTET51.1.116.35188	Early	1	1	1	0.98485	0.1901	0.202	0.58705	0.80805	0.8548	0.9571	0.96615	0.9882	1	1	1
IESPGM.PTET51.1.116.37322	Early	1	1	1	1	0.05205	0.2219	0.43315	0.63415	0.66065	0.89365	0.988	1	1	1	1
IESPGM.PTET51.1.116.58443	Early	1	1	0.99265	0.9855	0.1948	0.158	0.73865	0.79115	0.97415	0.99265	1	0.993	1	1	1
IESPGM.PTET51.1.116.60184	Early	1	1	1	1	0.162	0.1784	0.5633	0.62925	0.94855	0.9831	1	1	1	1	1
IESPGM.PTET51.1.116.64411	Early	1	1	1	0.9935	0.2	0.17985	0.6238	0.8392	0.95975	0.9815	1	0.9809	0.99455	1	1
IESPGM.PTET51.1.116.70781	Early	1	1	1	1	0.0743499999999999	0.14585	0.42105	0.70545	0.91825	0.9841	1	0.9879	0.987	1	1
IESPGM.PTET51.1.116.75621	Early	1	1	1	1	0.09485	0.1709	0.6602	0.71875	0.86465	0.9583	0.959	1	1	1	1
IESPGM.PTET51.1.116.76550	Early	1	1	1	1	0.18975	0.34815	0.7324	0.8485	1	0.9818	1	1	1	1	0.975
IESPGM.PTET51.1.116.77746	Early	1	1	1	1	0.34265	0.31825	0.6196	0.8745	0.95085	0.99265	1	1	1	1	1
IESPGM.PTET51.1.116.77892	Early	1	1	1	1	0.2481	0.1982	0.5477	0.5106	0.5544	0.9092	0.98195	0.997	0.9718	1	1
IESPGM.PTET51.1.116.79266	Early	1	1	0.9914	1	0.16675	0.242	0.66405	0.836	0.96805	0.99325	0.9589	0.99535	0.99255	1	0.9946
IESPGM.PTET51.1.116.80101	Early	1	1	1	0.9768	0.1572	0.1761	0.5062	0.8655	0.95715	0.98165	0.99805	1	1	1	1
IESPGM.PTET51.1.116.83203	Early	1	1	1	0.9919	0.298	0.34025	0.6563	0.84605	0.91435	0.9853	0.99815	0.9972	0.99475	1	0.9958
IESPGM.PTET51.1.116.84847	Early	1	1	1	0.9884	0.2356	0.3316	0.7337	0.83075	0.97675	0.9768	0.98895	1	1	1	1
IESPGM.PTET51.1.116.85146	Early	1	1	0.97315	1	0.0861000000000001	0.21285	0.33405	0.53085	0.77275	0.9704	0.9772	1	1	1	0.99535
IESPGM.PTET51.1.116.87674	Early	1	1	1	1	0.2192	0.25645	0.51875	0.86555	0.95145	0.99295	0.9958	0.99655	0.99495	1	1
IESPGM.PTET51.1.116.96679	Early	0.9933	1	0.9487	0.96795	0.094	0.2171	0.3858	0.6437	0.64095	0.9306	0.98635	0.9903	1	1	0.99525
IESPGM.PTET51.1.116.97131	Early	1	1	1	1	0.19205	0.34485	0.65255	0.88085	1	1	1	1	1	1	1
IESPGM.PTET51.1.116.98569	Early	0.9966	1	0.964	0.9884	0.2571	0.3623	0.63835	0.8085	0.94515	0.96055	0.98445	0.99	0.98385	0.9853	0.9904
IESPGM.PTET51.1.116.99055	Early	1	1	1	1	0.13775	0.10415	0.4211	0.6432	0.69085	0.96875	0.9932	0.9925	1	1	1
IESPGM.PTET51.1.117.100659	Early	1	1	1	0.9923	0.174	0.22815	0.43635	0.5802	0.77835	0.825	0.775	0.99125	1	0.98865	1
IESPGM.PTET51.1.117.103701	Early	1	0.9934	1	0.98765	0.06745	0.2037	0.58745	0.6291	0.84005	0.9524	1	0.9857	1	1	1
IESPGM.PTET51.1.117.107581	Early	1	1	1	1	0.0748	0.10715	0.43645	0.6811	0.83385	0.9412	0.9863	0.99365	1	1	1
IESPGM.PTET51.1.117.109995	Early	1	1	1	1	0.13035	0.122	0.4444	0.7778	1	1	1	1	1	1	1
IESPGM.PTET51.1.117.111914	Early	1	1	1	1	0.11965	0.21405	0.3279	0.72395	0.7667	0.95675	0.9762	0.99155	1	1	0.9947
IESPGM.PTET51.1.117.112102	Early	1	0.9947	1	1	0.1544	0.18875	0.32525	0.71445	0.8587	0.9712	0.90135	1	0.9868	1	1
IESPGM.PTET51.1.117.115177	Early	1	1	0.9942	1	0.13995	0.15275	0.1733	0.5256	0.8426	0.9334	1	0.98435	1	1	0.995
IESPGM.PTET51.1.117.125126	Early	1	1	1	1	0.20465	0.12985	0.35235	0.5698	0.69245	0.91695	0.94	1	1	1	1
IESPGM.PTET51.1.117.125951	Early	0.99335	1	1	1	0.18825	0.34105	0.6959	0.9083	0.95085	0.9875	0.9746	1	1	1	0.9947
IESPGM.PTET51.1.117.127633	Early	1	1	0.994	1	0.1588	0.1994	0.32365	0.7968	0.82935	0.9878	1	0.9851	1	1	1
IESPGM.PTET51.1.117.132529	Early	1	1	0.9935	0.9934	0.1001	0.0943000000000001	0.4719	0.55515	0.8649	0.96	0.99275	1	0.99265	0.9902	1
IESPGM.PTET51.1.117.133932	Early	1	1	0.9865	0.97565	0.2229	0.06595	0.29115	0.55085	0.7367	0.92485	0.9571	1	0.9875	1	0.9947
IESPGM.PTET51.1.117.145326	Early	1	1	0.9683	1	0.2107	0.2429	0.48555	0.76185	0.9444	0.9918	1	0.98505	1	1	1
IESPGM.PTET51.1.117.151672	Early	1	1	0.99425	0.9943	0.0646	0.40565	0.69175	0.88645	0.98685	1	0.9948	1	1	1	1
IESPGM.PTET51.1.117.153399	Early	0.9889	1	0.99255	0.99315	0.1333	0.0397	0.32245	0.63945	0.8002	0.9647	0.98765	1	1	1	1
IESPGM.PTET51.1.117.168795	Early	0.9935	0.98935	1	0.99455	0.0599499999999999	0.1646	0.5082	0.8138	0.9482	0.99125	0.9936	0.99305	1	1	1
IESPGM.PTET51.1.117.169370	Early	1	1	0.9941	1	0.0440499999999999	0.1724	0.31475	0.5045	0.7679	0.90155	1	0.9855	1	1	1
IESPGM.PTET51.1.117.170003	Early	1	1	0.9935	1	0.08895	0.23725	0.3918	0.674	0.86415	0.9685	0.97	1	1	1	1
IESPGM.PTET51.1.117.172803	Early	1	1	1	0.99335	0.1212	0.1926	0.67605	0.73195	0.837	0.9118	0.9244	0.98075	1	1	1
IESPGM.PTET51.1.117.175122	Early	1	1	1	1	0.2202	0.33435	0.7495	0.77345	0.9191	0.99325	1	1	0.98305	1	0.99495
IESPGM.PTET51.1.117.17630	Early	1	0.988	0.9943	1	0.2942	0.2778	0.46675	0.71315	0.9197	0.95485	0.941	1	1	1	1
IESPGM.PTET51.1.117.176776	Early	1	1	1	1	0.0388500000000001	0.2134	0.5414	0.86905	0.85415	0.97725	0.9922	0.99075	1	1	1
IESPGM.PTET51.1.117.182556	Early	1	0.99125	1	0.9924	0.12	0.09195	0.51745	0.64765	0.9201	0.9273	0.963	0.9904	1	0.9889	0.98865
IESPGM.PTET51.1.117.186049	Early	1	1	0.9918	1	0.14955	0.10875	0.52615	0.8572	0.93055	1	0.95425	0.9936	1	1	1
IESPGM.PTET51.1.117.186071	Early	1	0.9898	1	1	0.0875999999999999	0.11425	0.375	0.65285	0.81195	0.92765	0.83575	0.9855	1	1	1
IESPGM.PTET51.1.117.188099	Early	1	1	0.9949	1	0.1842	0.2146	0.4368	0.7056	0.86985	0.96455	1	0.9761	0.99335	1	1
IESPGM.PTET51.1.117.197126	Early	1	1	0.99265	1	0.2772	0.365	0.60715	0.8538	0.98325	0.9831	1	1	1	1	1
IESPGM.PTET51.1.117.198138	Early	1	1	1	0.99335	0.173	0.20715	0.6909	0.9526	0.9872	0.9872	0.9835	1	1	1	1
IESPGM.PTET51.1.117.201014	Early	1	1	0.9804	0.9939	0.0728500000000001	0.36075	0.8	0.809	0.9507	0.9612	0.9922	1	0.9922	0.9904	1
IESPGM.PTET51.1.117.201820	Early	1	1	0.9749	1	0.17225	0.31665	0.5187	0.6795	0.81475	0.9392	1	0.98	1	1	1
IESPGM.PTET51.1.117.203198	Early	0.9885	1	1	0.99265	0.19715	0.2626	0.7784	0.7788	0.94395	0.9692	0.9935	1	0.99265	0.9902	0.99515
IESPGM.PTET51.1.117.203619	Early	1	1	1	0.9943	0.10535	0.196	0.4225	0.66305	0.8445	0.87085	0.9873	1	0.99325	0.9922	1
IESPGM.PTET51.1.117.204872	Early	1	1	0.9889	1	0.046	0.0344	0.39165	0.5278	0.76785	0.84395	0.93165	1	0.99	0.98215	0.9878
IESPGM.PTET51.1.117.207714	Early	1	1	0.99285	0.99265	0.14475	0.225	0.24245	0.7097	0.8058	0.89685	1	1	0.9939	1	1
IESPGM.PTET51.1.117.209650	Early	1	1	1	1	0.2069	0.185	0.49425	0.7087	0.931	0.97875	0.89605	0.97645	1	1	1
IESPGM.PTET51.1.117.211476	Early	1	1	1	1	0.30495	0.2622	0.6839	0.8248	0.96645	0.9831	1	1	1	1	0.99475
IESPGM.PTET51.1.117.212397	Early	1	1	0.9701	0.99205	0.1557	0.2391	0.5717	0.7945	0.9262	0.95905	1	1	1	1	1
IESPGM.PTET51.1.117.226244	Early	0.9579	1	1	0.9458	0.0655	0.15425	0.48635	0.4215	0.7644	0.84595	0.92725	0.93075	0.93525	1	0.9907
IESPGM.PTET51.1.117.237242	Early	1	1	0.98275	1	0.0211	0.13585	0.29315	0.6322	0.8798	0.96405	1	0.9918	1	1	1
IESPGM.PTET51.1.117.242858	Early	1	1	0.99105	1	0.0627	0.1868	0.35115	0.69815	0.87365	0.92905	0.97	1	1	1	1
IESPGM.PTET51.1.117.251343	Early	1	1	0.99315	1	0.07685	0.3277	0.60615	0.6617	0.9037	0.93775	0.9036	0.99195	1	1	1
IESPGM.PTET51.1.117.252810	Early	1	1	1	1	0.127	0.30075	0.6145	0.8605	0.89235	0.99195	1	1	1	1	1
IESPGM.PTET51.1.117.265507	Early	1	1	0.9789	1	0.17725	0.23695	0.495	0.71035	0.9418	0.97825	1	1	1	1	0.9945
IESPGM.PTET51.1.117.27493	Early	1	1	0.9841	1	0.022	0.09045	0.50485	0.79055	0.9057	0.97875	0.96895	0.99055	1	1	0.9944
IESPGM.PTET51.1.117.29827	Early	1	0.987	0.9941	1	0.30405	0.251	0.62825	0.8095	0.96025	0.9935	0.9706	1	0.98115	1	1
IESPGM.PTET51.1.117.36429	Early	1	1	0.9825	1	0.1033	0.227	0.5667	0.79275	0.9861	0.9859	0.99295	1	1	1	1
IESPGM.PTET51.1.117.40139	Early	1	1	0.99	0.99365	0.1098	0.1682	0.83715	0.9403	1	1	0.97905	1	0.9922	1	1
IESPGM.PTET51.1.117.5005	Early	1	1	1	0.9366	0.0246999999999999	0.12855	0.52825	0.5876	0.79005	0.9579	0.97485	0.97905	0.97095	1	0.99285
IESPGM.PTET51.1.117.5529	Early	1	1	0.97825	1	0.11805	0.1818	0.5063	0.63385	0.77665	0.89315	0.95805	0.99265	1	1	1
IESPGM.PTET51.1.117.5659	Early	1	1	1	1	0.0958	0.1812	0.59485	0.7778	0.78805	0.94275	0.97035	1	1	1	1
IESPGM.PTET51.1.117.5787	Early	1	1	1	1	0.04715	0.26265	0.4755	0.6015	0.8286	0.9106	0.9565	0.99155	1	1	1
IESPGM.PTET51.1.117.64383	Early	0.99315	0.88375	0.9857	1	0.06075	0.08525	0.35665	0.6554	0.8081	0.96245	1	0.99075	1	1	1
IESPGM.PTET51.1.117.77909	Early	0.9948	1	0.9904	1	0.14215	0.15075	0.3686	0.52035	0.90785	0.97655	0.97825	1	1	1	1
IESPGM.PTET51.1.117.82060	Early	0.9945	1	0.99125	1	0.1375	0.1531	0.19205	0.55375	0.8935	0.9808	0.9508	1	1	1	1
IESPGM.PTET51.1.117.82720	Early	1	1	0.9808	1	0.11435	0.1002	0.443	0.7419	0.96295	0.97845	0.97785	1	1	1	0.9945
IESPGM.PTET51.1.117.87006	Early	0.99365	0.99165	0.9828	1	0.0489999999999999	0.2047	0.55235	0.8607	0.98125	0.9799	1	1	1	1	1
IESPGM.PTET51.1.117.87341	Early	1	1	1	1	0.02745	0.0931	0.42485	0.75975	0.9383	1	0.96925	1	1	1	1
IESPGM.PTET51.1.117.89293	Early	1	1	1	1	0.0720499999999999	0.36055	0.6795	0.7547	0.9744	0.9844	1	1	1	0.9909	0.99425
IESPGM.PTET51.1.117.89666	Early	1	1	1	1	0.1244	0.1507	0.44125	0.5649	0.85505	0.97445	0.99375	1	0.9863	1	1
IESPGM.PTET51.1.117.91934	Early	1	1	1	1	0.1154	0.244	0.6892	0.78535	0.9018	0.9733	0.9851	1	1	1	1
IESPGM.PTET51.1.117.944	Early	1	1	1	1	0.0254000000000001	0.1561	0.48055	0.8032	0.93915	1	1	1	0.99125	1	1
IESPGM.PTET51.1.118.101126	Early	1	1	1	0.99255	0.1456	0.1868	0.52645	0.72795	0.9362	0.96945	0.99105	1	0.98415	0.9918	0.99325
IESPGM.PTET51.1.118.102830	Early	1	1	1	1	0.1777	0.2103	0.74375	0.88295	0.9898	1	1	0.9853	1	1	0.99545
IESPGM.PTET51.1.118.108675	Early	1	1	0.99125	1	0.2885	0.2846	0.69515	0.888	0.93165	0.99205	1	1	1	1	0.98705
IESPGM.PTET51.1.118.110193	Early	1	1	1	1	0.1702	0.19605	0.55845	0.876	0.96785	0.9922	0.97915	0.97205	1	1	1
IESPGM.PTET51.1.118.110404	Early	1	1	0.9872	1	0.17785	0.0225	0.485	0.5789	0.7492	0.93885	0.97115	0.9749	1	1	1
IESPGM.PTET51.1.118.113080	Early	1	0.9884	0.9836	1	0.07955	0.3336	0.44705	0.58395	0.8154	0.89435	0.9303	1	0.97965	0.9839	1
IESPGM.PTET51.1.118.113606	Early	1	1	0.99315	1	0.0981	0.159	0.34625	0.6903	0.65565	0.8574	0.78855	0.9697	1	1	1
IESPGM.PTET51.1.118.121068	Early	1	1	1	1	0.02305	0.1982	0.54495	0.72115	0.95795	0.96005	0.9945	0.99155	1	1	0.9947
IESPGM.PTET51.1.118.123645	Early	1	1	1	1	0.2435	0.3946	0.6868	0.8356	0.9346	0.95485	0.9762	1	0.99295	1	0.9857
IESPGM.PTET51.1.118.130988	Early	1	1	1	0.99155	0.1026	0.19555	0.52395	0.78595	0.8587	0.99265	1	0.9934	1	1	1
IESPGM.PTET51.1.118.132985	Early	1	0.99305	1	1	0.17405	0.21875	0.40565	0.7429	0.81675	0.974	0.88555	0.97675	1	0.974	1
IESPGM.PTET51.1.118.140339	Early	1	0.99475	1	1	0.25005	0.3651	0.6093	0.7673	0.9082	0.9922	1	1	1	1	1
IESPGM.PTET51.1.118.143219	Early	1	1	0.9934	1	0.0432	0.0736	0.30895	0.6439	0.8176	0.9403	0.9817	0.9661	1	1	1
IESPGM.PTET51.1.118.145667	Early	1	0.9531	0.9759	0.99075	0.1707	0.17055	0.38055	0.52175	0.9165	0.97845	0.9315	1	1	1	1
IESPGM.PTET51.1.118.149148	Early	1	1	0.9524	0.9505	0.1601	0.19105	0.38185	0.6382	0.8631	0.86605	0.9316	0.9831	0.9941	1	0.9689
IESPGM.PTET51.1.118.155783	Early	1	1	0.9902	1	0.09485	0.19185	0.35925	0.64375	0.8164	0.95585	0.9027	1	0.99375	1	1
IESPGM.PTET51.1.118.162107	Early	1	1	1	1	0.10595	0.3514	0.6963	0.86405	0.9328	1	0.94455	0.9831	0.9863	1	1
IESPGM.PTET51.1.118.162310	Early	1	1	1	1	0.13625	0.1856	0.6755	0.81245	0.9796	1	0.9857	0.97205	1	1	1
IESPGM.PTET51.1.118.164151	Early	1	1	0.99205	1	0.0801000000000001	0.0912999999999999	0.30045	0.5836	0.7889	0.97095	0.93105	1	0.99255	1	1
IESPGM.PTET51.1.118.168449	Early	1	0.99535	0.9947	0.9961	0.14	0.21775	0.3375	0.667	0.78185	0.90225	0.9294	0.99055	0.99325	1	1
IESPGM.PTET51.1.118.182423	Early	1	0.9245	1	1	0.2705	0.2076	0.3885	0.7826	0.9356	0.92315	0.99425	0.9848	1	1	1
IESPGM.PTET51.1.118.191278	Early	1	0.9875	0.964	1	0.0932500000000001	0.0847500000000001	0.4123	0.5833	0.81195	0.9396	0.9688	0.99205	0.99325	1	0.9906
IESPGM.PTET51.1.118.195282	Early	1	1	1	0.99485	0.12975	0.2834	0.46175	0.7864	0.7965	0.9674	0.9579	0.9944	1	1	1
IESPGM.PTET51.1.118.204303	Early	1	1	1	1	0.19135	0.21715	0.61195	0.7818	0.8688	0.96355	0.9648	1	1	1	1
IESPGM.PTET51.1.118.21446	Early	1	1	0.9923	1	0.0769	0.1625	0.63975	0.8249	0.9413	0.95585	0.9423	1	1	1	1
IESPGM.PTET51.1.118.22660	Early	1	1	0.99335	1	0.0825	0.33775	0.41795	0.67765	0.7756	0.95675	0.97095	0.97545	0.99385	1	1
IESPGM.PTET51.1.118.23173	Early	1	1	0.97645	1	0.16655	0.2823	0.7197	0.74705	0.91005	0.9746	0.9077	1	1	1	1
IESPGM.PTET51.1.118.23263	Early	1	1	0.96505	1	0.14175	0.19755	0.40535	0.4622	0.763	0.96185	0.9762	1	1	1	0.99515
IESPGM.PTET51.1.118.237074	Early	1	0.9904	0.9902	1	0.09795	0.15755	0.35145	0.77545	0.76665	0.9846	0.94645	0.99285	0.99335	1	1
IESPGM.PTET51.1.118.238140	Early	1	1	1	1	0.0978	0.1264	0.4338	0.7846	0.91415	0.9836	0.9935	0.9692	1	1	1
IESPGM.PTET51.1.118.242692	Early	1	1	0.98485	1	0.04	0.28355	0.48425	0.8515	0.94625	0.99125	0.91835	0.9855	1	1	1
IESPGM.PTET51.1.118.247638	Early	1	1	1	1	0.1175	0.1966	0.2996	0.6362	0.84755	0.87655	0.9664	0.9722	0.9935	1	1
IESPGM.PTET51.1.118.250839	Early	1	1	1	0.9885	0.0513	0.1874	0.4569	0.7565	0.80505	0.98	0.99305	0.987	1	0.96665	1
IESPGM.PTET51.1.118.254439	Early	1	1	0.99365	1	0.1489	0.2959	0.73055	0.9289	1	1	1	0.9909	1	1	1
IESPGM.PTET51.1.118.261896	Early	1	1	0.9934	1	0.0692	0.16685	0.2882	0.68225	0.8362	0.95145	0.9859	0.97935	1	1	1
IESPGM.PTET51.1.118.279052	Early	1	1	0.99265	1	0.1119	0.1213	0.22345	0.66675	0.78355	1	0.93075	1	1	1	0.99555
IESPGM.PTET51.1.118.31510	Early	1	1	1	1	0.24085	0.2521	0.665	0.72375	0.8201	0.9768	0.9716	0.97815	0.9885	0.9914	0.9955
IESPGM.PTET51.1.118.33932	Early	1	1	1	1	0.08605	0.20885	0.7057	0.91475	0.95	1	1	1	1	1	1
IESPGM.PTET51.1.118.36903	Early	1	1	1	1	0.1471	0.24145	0.759	0.87185	0.9423	0.96555	1	0.9923	1	0.9909	1
IESPGM.PTET51.1.118.37989	Early	1	1	0.99315	0.9941	0.2	0.22415	0.5529	0.77205	0.86775	0.9574	1	0.9802	1	1	0.9934
IESPGM.PTET51.1.118.39082	Early	1	0.97805	0.99365	1	0.12315	0.16015	0.37235	0.6557	0.82515	0.9541	0.9357	0.98165	0.99385	1	1
IESPGM.PTET51.1.118.58295	Early	1	1	1	1	0.1207	0.1942	0.4565	0.5217	0.82965	0.9863	0.98	0.99255	1	1	1
IESPGM.PTET51.1.118.58643	Early	1	1	0.972	1	0.1351	0.26965	0.23125	0.5625	0.72545	0.93705	1	1	1	1	0.97965
IESPGM.PTET51.1.118.58924	Early	1	1	1	1	0.12275	0.21825	0.525	0.668	0.6402	0.93075	0.9778	1	0.9935	1	0.9878
IESPGM.PTET51.1.118.60533	Early	1	1	0.9914	1	0.2361	0.18535	0.7526	0.9175	0.97435	0.99295	1	1	0.9853	1	1
IESPGM.PTET51.1.118.65735	Early	1	1	0.9923	0.9914	0.23575	0.10315	0.4733	0.705	0.86485	0.9602	0.99425	0.99275	1	1	1
IESPGM.PTET51.1.118.67232	Early	0.9939	1	0.9804	1	0.17425	0.19305	0.64075	0.8335	0.8957	0.972	1	0.987	1	0.9697	1
IESPGM.PTET51.1.118.68737	Early	0.97465	1	0.99365	1	0.2036	0.2787	0.38205	0.8471	0.9652	0.99155	0.98315	1	0.994	1	0.98745
IESPGM.PTET51.1.118.72368	Early	1	1	1	1	0.09	0.1375	0.53135	0.75	0.90505	0.9878	1	1	1	0.98835	1
IESPGM.PTET51.1.118.72586	Early	1	1	0.9918	1	0.07595	0.0923499999999999	0.27595	0.7207	0.90095	0.94855	0.85835	1	1	1	1
IESPGM.PTET51.1.118.81051	Early	1	1	1	1	0.06745	0.1277	0.22075	0.59135	0.90885	0.94285	0.90335	1	1	0.9898	1
IESPGM.PTET51.1.118.81158	Early	1	0.98935	0.99265	1	0.1814	0.1053	0.417	0.613	0.68125	0.84925	1	1	1	0.9853	1
IESPGM.PTET51.1.118.91129	Early	1	1	1	0.9818	0.0690500000000001	0.16055	0.2823	0.73565	0.7902	0.93215	1	0.9904	1	1	1
IESPGM.PTET51.1.118.94763	Early	1	1	1	1	0.1623	0.2572	0.7382	0.9155	0.9946	1	1	0.9836	1	1	1
IESPGM.PTET51.1.118.98154	Early	1	1	1	1	0.1842	0.18335	0.5241	0.7755	0.89465	0.92315	0.93015	1	1	1	1
IESPGM.PTET51.1.118.98646	Early	1	1	1	1	0.2114	0.1594	0.4659	0.6237	0.81345	0.95155	1	0.9821	0.987	1	1
IESPGM.PTET51.1.118.99442	Early	1	1	0.9851	1	0.0660000000000001	0.2094	0.5831	0.7846	0.92645	0.92315	0.8734	1	1	1	1
IESPGM.PTET51.1.119.110138	Early	1	1	0.9863	1	0.1761	0.2261	0.68695	0.85015	0.93855	1	0.97815	0.9818	1	1	1
IESPGM.PTET51.1.119.111914	Early	1	1	0.9844	1	0.0910500000000001	0.15725	0.51555	0.64775	0.79775	0.92855	0.92375	1	1	1	1
IESPGM.PTET51.1.119.11806	Early	1	1	0.9941	0.9744	0.3065	0.2189	0.5335	0.8793	0.90405	0.968	1	0.99195	1	1	0.99545
IESPGM.PTET51.1.119.135606	Early	1	1	0.99295	1	0.05555	0.1094	0.4688	0.55155	0.7121	0.8706	0.7439	1	1	0.9914	1
IESPGM.PTET51.1.119.137038	Early	0.9952	0.9922	0.9934	0.9947	0.12085	0.11395	0.4121	0.7176	0.928	1	0.9802	1	1	1	1
IESPGM.PTET51.1.119.139110	Early	1	1	1	1	0.14155	0.2056	0.57935	0.84755	0.9357	0.99365	0.9914	1	0.99425	1	1
IESPGM.PTET51.1.119.147303	Early	1	1	1	0.99195	0.12295	0.09615	0.3268	0.6151	0.76125	0.94155	0.9593	1	0.99325	1	1
IESPGM.PTET51.1.119.148169	Early	1	1	0.9922	1	0.30945	0.19785	0.5025	0.7861	0.86265	0.9811	0.9865	1	1	1	1
IESPGM.PTET51.1.119.149847	Early	1	0.9815	0.9914	0.99425	0.1376	0.1807	0.53335	0.7513	0.86655	0.9444	0.918	0.98665	1	1	0.9896
IESPGM.PTET51.1.119.152419	Early	1	1	1	1	0.0652	0.1253	0.2882	0.74735	0.79475	0.95145	0.97405	0.97645	0.99195	0.9787	1
IESPGM.PTET51.1.119.153625	Early	1	0.99265	1	1	0.18895	0.21835	0.4144	0.76145	0.87525	0.99285	0.9905	1	1	1	1
IESPGM.PTET51.1.119.155086	Early	1	0.9882	1	1	0.17225	0.2927	0.49755	0.83535	0.9681	0.9946	1	1	1	1	1
IESPGM.PTET51.1.119.16758	Early	0.9651	1	1	1	0.19695	0.29805	0.66715	0.87175	0.98695	0.9643	1	0.9848	0.9923	1	1
IESPGM.PTET51.1.119.169562	Early	1	1	1	1	0.19265	0.2432	0.7917	0.8562	0.97475	1	1	1	1	1	0.9942
IESPGM.PTET51.1.119.173433	Early	1	1	0.98245	1	0.1159	0.19435	0.55275	0.75645	0.83915	0.9458	0.8625	0.9839	1	1	1
IESPGM.PTET51.1.119.174382	Early	1	1	1	1	0.1739	0.24765	0.53925	0.88235	0.9677	0.99105	1	1	1	1	1
IESPGM.PTET51.1.119.174853	Early	1	1	0.9888	1	0.1926	0.24555	0.6543	0.808	0.9375	1	1	1	1	1	1
IESPGM.PTET51.1.119.179070	Early	1	1	1	0.9949	0.14715	0.2568	0.6043	0.61995	0.76035	0.91045	0.9733	1	0.99365	0.9923	1
IESPGM.PTET51.1.119.180500	Early	1	1	0.9878	1	0.0217000000000001	0.1375	0.38945	0.61535	0.83065	0.9226	1	0.99305	1	1	1
IESPGM.PTET51.1.119.183433	Early	1	1	1	1	0.2257	0.28185	0.8127	0.77795	0.8935	0.97965	0.9403	0.9923	1	1	1
IESPGM.PTET51.1.119.186546	Early	1	1	1	0.9831	0.2387	0.18525	0.5975	0.7394	0.81845	0.9524	0.9045	0.9881	0.99285	0.9922	1
IESPGM.PTET51.1.119.191519	Early	1	1	1	1	0.0442	0.12225	0.30605	0.5048	0.83195	0.959	0.85715	1	1	1	1
IESPGM.PTET51.1.119.194450	Early	1	1	0.99205	1	0.1132	0.14415	0.5035	0.80005	0.9329	0.9593	0.92835	0.99365	1	1	1
IESPGM.PTET51.1.119.203909	Early	1	1	0.9867	1	0.2174	0.2024	0.76735	0.9216	1	1	1	1	1	1	1
IESPGM.PTET51.1.119.211460	Early	1	1	0.99275	1	0.28315	0.3715	0.6727	0.73105	0.95275	0.92345	0.9524	1	0.9607	1	0.9885
IESPGM.PTET51.1.119.213158	Early	1	1	1	0.9875	0.12805	0.29075	0.56915	0.7007	0.8603	0.93135	0.9685	0.9697	0.99255	1	1
IESPGM.PTET51.1.119.223065	Early	1	1	0.99155	0.99	0.168	0.27135	0.6911	0.8425	0.9766	0.99195	0.99285	1	1	1	1
IESPGM.PTET51.1.119.225646	Early	1	1	0.99255	1	0.11385	0.3606	0.4897	0.6465	0.86275	0.94125	0.9603	0.9839	1	1	1
IESPGM.PTET51.1.119.230749	Early	1	1	0.9945	1	0.3611	0.25085	0.6001	0.8032	0.98185	0.95735	1	1	1	1	1
IESPGM.PTET51.1.119.243312	Early	1	0.99105	0.99365	1	0.0808	0.16085	0.3545	0.60405	0.7378	0.911	0.9661	0.9914	0.9939	1	0.9952
IESPGM.PTET51.1.119.251311	Early	1	1	1	0.9851	0.23855	0.1409	0.3589	0.55655	0.8391	0.9722	0.90295	0.98245	0.99385	1	1
IESPGM.PTET51.1.119.252332	Early	1	1	1	1	0.1845	0.14645	0.2668	0.52785	0.76785	0.9471	0.9667	0.98435	1	1	1
IESPGM.PTET51.1.119.252461	Early	1	1	1	1	0.2059	0.25795	0.5103	0.77565	0.90535	0.9768	1	0.9949	1	1	1
IESPGM.PTET51.1.119.252590	Early	1	1	1	1	0.107	0.028	0.27835	0.6669	0.76675	0.9804	1	1	1	1	1
IESPGM.PTET51.1.119.253493	Early	1	1	0.99505	0.99485	0.2427	0.2241	0.4411	0.595	0.8663	0.9733	0.98	1	1	1	1
IESPGM.PTET51.1.119.253622	Early	1	1	1	1	0.22005	0.23425	0.62255	0.8243	0.92865	0.9807	1	1	1	1	1
IESPGM.PTET51.1.119.253751	Early	1	1	1	0.9854	0.2108	0.13165	0.4193	0.6195	0.7576	0.9506	0.9914	1	0.9908	1	1
IESPGM.PTET51.1.119.254267	Early	1	1	0.99205	1	0.25765	0.22105	0.4094	0.7763	0.801	0.9706	1	1	1	1	1
IESPGM.PTET51.1.119.254525	Early	1	0.9546	0.9952	1	0.26725	0.2554	0.49495	0.69115	0.7968	0.9649	1	1	1	1	1
IESPGM.PTET51.1.119.254912	Early	1	1	0.9732	1	0.10565	0.1889	0.3652	0.54735	0.7862	0.9252	0.949	0.99485	1	1	0.99
IESPGM.PTET51.1.119.255041	Early	1	1	0.9851	0.9955	0.1354	0.26325	0.585	0.711	0.83795	0.973	0.95945	1	1	1	1
IESPGM.PTET51.1.119.255299	Early	1	1	1	1	0.176	0.1975	0.5198	0.6973	0.8173	0.9885	0.9425	1	1	1	1
IESPGM.PTET51.1.119.255428	Early	1	1	1	1	0.29575	0.23735	0.6231	0.7414	0.6949	0.9733	0.9342	1	1	1	1
IESPGM.PTET51.1.119.255557	Early	1	1	1	1	0.19605	0.25965	0.4178	0.69295	0.8822	0.975	1	1	1	1	1
IESPGM.PTET51.1.119.255815	Early	1	1	0.96865	0.99165	0.25005	0.1959	0.4718	0.5455	0.6986	0.88555	1	0.9888	1	0.9889	0.9928
IESPGM.PTET51.1.119.256073	Early	1	1	0.99	1	0.14	0.09615	0.3165	0.52435	0.733	0.9677	0.9392	0.9863	1	1	1
IESPGM.PTET51.1.119.256202	Early	0.996	1	0.9827	1	0.33715	0.26135	0.71725	0.792	0.9348	0.95905	1	1	1	1	1
IESPGM.PTET51.1.119.263257	Early	1	1	1	0.9796	0.21765	0.1528	0.6738	0.7586	0.9758	0.9814	0.98865	0.9828	1	1	1
IESPGM.PTET51.1.119.268497	Early	1	1	1	1	0.08895	0.27295	0.6548	0.89535	1	1	1	0.96505	0.9942	1	1
IESPGM.PTET51.1.119.274545	Early	1	0.9423	1	1	0.1716	0.2902	0.7033	0.88745	0.9936	1	1	1	1	1	1
IESPGM.PTET51.1.119.283180	Early	1	1	1	0.99055	0.2111	0.229	0.5109	0.65335	0.8305	1	0.98915	1	1	1	1
IESPGM.PTET51.1.119.39355	Early	1	1	0.98	0.99075	0.1002	0.13285	0.31475	0.72775	0.74165	0.9353	0.97415	0.9749	0.9859	0.9904	0.99285
IESPGM.PTET51.1.119.43916	Early	1	1	1	1	0.1798	0.24955	0.63735	0.8272	0.8968	0.9817	0.96325	0.99325	1	1	1
IESPGM.PTET51.1.119.49104	Early	0.9942	1	0.99275	0.9865	0.02175	0.16235	0.56925	0.7032	0.9504	0.98385	1	0.98385	1	1	0.99385
IESPGM.PTET51.1.119.54966	Early	1	1	0.9762	0.98245	0.1429	0.0365	0.44165	0.7416	0.92795	0.9904	1	1	1	1	1
IESPGM.PTET51.1.119.55503	Early	1	1	1	1	0.0635	0.122	0.442	0.7083	0.80125	0.95585	0.97305	1	1	1	1
IESPGM.PTET51.1.119.56965	Early	1	1	0.99055	1	0.13925	0.281	0.62635	0.9177	0.9671	0.98115	1	0.99105	1	1	0.9882
IESPGM.PTET51.1.119.59595	Early	1	1	0.97825	1	0.10315	0.36665	0.59095	0.8043	0.995	1	1	1	1	1	0.9946
IESPGM.PTET51.1.119.59603	Early	1	1	1	1	0.0334	0.2915	0.5625	0.8205	0.9708	0.99	1	1	1	1	0.9892
IESPGM.PTET51.1.119.64665	Early	1	1	0.99315	1	0.37385	0.33345	0.48695	0.7107	0.74235	0.82825	0.9049	0.9566	0.977	1	1
IESPGM.PTET51.1.119.67782	Early	1	1	1	0.9945	0.06785	0.1818	0.3536	0.70275	0.95	0.9914	1	0.99295	0.9805	1	1
IESPGM.PTET51.1.119.72877	Early	1	1	1	1	0.13045	0.14865	0.1904	0.67945	0.7275	0.94855	0.99385	0.9857	1	1	1
IESPGM.PTET51.1.119.74067	Early	1	1	0.9914	0.99195	0.0625	0.1463	0.4835	0.8044	0.97485	0.99195	1	1	1	1	1
IESPGM.PTET51.1.119.77561	Early	1	1	1	1	0.13865	0.23655	0.6991	0.7167	0.89765	0.92755	0.9647	1	0.99335	1	1
IESPGM.PTET51.1.119.88536	Early	1	1	1	1	0.0261	0.14745	0.34445	0.5506	0.82945	0.92315	0.92375	0.99105	0.99335	0.98915	1
IESPGM.PTET51.1.119.93787	Early	1	1	0.99315	1	0.13095	0.15145	0.3701	0.518	0.7509	0.86875	0.9083	0.99165	1	1	0.99385
IESPGM.PTET51.1.119.96584	Early	1	1	1	1	0.1167	0.2737	0.4123	0.8873	0.9873	1	1	0.9909	0.9923	1	1
IESPGM.PTET51.1.12.103477	Early	1	1	0.9861	1	0.19345	0.33	0.63105	0.8133	0.955	1	0.9936	1	1	1	1
IESPGM.PTET51.1.12.106050	Early	1	1	0.9773	1	0.06845	0.2229	0.4183	0.65855	0.92295	0.9336	1	0.98935	1	1	1
IESPGM.PTET51.1.12.106761	Early	1	1	1	1	0.04695	0.1094	0.46195	0.65185	0.9249	0.9859	0.9787	0.9863	1	0.9902	1
IESPGM.PTET51.1.12.107204	Early	1	0.9918	1	1	0.1601	0.21185	0.42515	0.71635	0.85195	0.94495	0.96265	0.9914	1	1	1
IESPGM.PTET51.1.12.1078	Early	1	0.98665	1	1	0.12615	0.0710500000000001	0.478	0.4338	0.7337	0.9413	0.96375	0.9792	1	1	0.99585
IESPGM.PTET51.1.12.111611	Early	1	0.99255	0.9831	1	0.07465	0.17325	0.40895	0.62725	0.91765	0.9613	1	1	1	1	1
IESPGM.PTET51.1.12.116394	Early	1	1	1	1	0.1429	0.27795	0.6311	0.89635	0.99565	1	1	1	0.9865	1	1
IESPGM.PTET51.1.12.11989	Early	1	1	1	0.9701	0.1735	0.4327	0.6716	0.79655	0.96025	0.95875	1	1	0.9796	1	1
IESPGM.PTET51.1.12.12798	Early	1	0.98385	1	1	0.21065	0.20255	0.46175	0.6525	0.9186	0.93135	0.94485	1	1	1	1
IESPGM.PTET51.1.12.130689	Early	1	1	1	1	0.15985	0.13675	0.61295	0.8681	0.857	1	1	0.99125	1	1	1
IESPGM.PTET51.1.12.13528	Early	1	1	0.9918	0.99265	0.0251	0.18	0.4134	0.8477	0.90805	0.99325	0.9889	0.9889	1	1	1
IESPGM.PTET51.1.12.139809	Early	1	1	0.9566	1	0.20685	0.40005	0.4189	0.6423	0.78015	1	1	1	1	1	1
IESPGM.PTET51.1.12.140244	Early	1	1	0.9909	1	0.1385	0.2994	0.3947	0.6787	0.7907	0.9802	1	1	1	1	1
IESPGM.PTET51.1.12.140392	Early	1	1	0.9922	1	0.1856	0.1897	0.51925	0.7597	0.9275	0.9667	0.9643	1	1	1	0.994
IESPGM.PTET51.1.12.145524	Early	1	1	1	1	0.26785	0.1566	0.5451	0.65215	0.80045	0.9464	0.9671	0.9885	0.9888	1	1
IESPGM.PTET51.1.12.145870	Early	1	1	0.99385	1	0.2382	0.29755	0.5046	0.75	0.82975	0.91055	0.8058	1	0.9538	1	0.9921
IESPGM.PTET51.1.12.146736	Early	1	1	1	0.99585	0.1212	0.32735	0.51235	0.78015	0.9538	0.9857	1	1	1	1	1
IESPGM.PTET51.1.12.150527	Early	1	1	0.99055	1	0.0541	0.16475	0.48855	0.6379	0.7543	0.92485	1	1	1	1	1
IESPGM.PTET51.1.12.152321	Early	1	1	1	0.9947	0.29315	0.19375	0.4439	0.7824	0.88995	0.97385	0.9747	1	1	1	1
IESPGM.PTET51.1.12.159483	Early	1	1	1	0.9944	0.18765	0.13395	0.31325	0.6113	0.7797	0.9448	0.97905	1	1	1	1
IESPGM.PTET51.1.12.160107	Early	0.99375	1	1	1	0.093	0.16025	0.4571	0.8545	0.86595	0.9511	1	1	0.99195	1	1
IESPGM.PTET51.1.12.163817	Early	1	0.99195	0.99295	1	0.31665	0.29115	0.5282	0.88905	0.88705	0.9855	1	1	1	1	1
IESPGM.PTET51.1.12.164154	Early	1	1	1	0.9925	0.2737	0.2745	0.24105	0.5247	0.8363	0.9385	0.9664	1	1	1	1
IESPGM.PTET51.1.12.179124	Early	1	1	1	1	0.17535	0.18695	0.4445	0.5614	0.6799	0.8341	0.98485	0.971	1	1	1
IESPGM.PTET51.1.12.183623	Early	1	1	0.9909	1	0.14135	0.2631	0.451	0.7797	0.94745	1	1	1	0.9857	1	1
IESPGM.PTET51.1.12.184823	Early	1	1	1	1	0.03905	0.13695	0.26205	0.5232	0.8522	0.9383	0.98215	0.987	1	0.9898	1
IESPGM.PTET51.1.12.186901	Early	1	1	1	1	0.2217	0.24365	0.7038	0.85125	1	1	1	1	1	1	1
IESPGM.PTET51.1.12.187143	Early	1	0.9939	1	1	0.1486	0.31045	0.61415	0.86975	0.9256	0.99295	1	1	1	1	1
IESPGM.PTET51.1.12.188526	Early	1	1	1	0.9949	0.05145	0.3336	0.855	0.82965	0.95045	1	1	1	1	1	1
IESPGM.PTET51.1.12.192305	Early	1	1	1	1	0.20295	0.2927	0.5212	0.7207	0.91395	0.9366	0.95875	1	1	1	1
IESPGM.PTET51.1.12.199310	Early	1	1	1	0.99445	0.12855	0.22845	0.5874	0.6755	0.92655	0.98665	0.9914	1	1	1	1
IESPGM.PTET51.1.12.200390	Early	1	1	0.99495	1	0.11965	0.3046	0.4613	0.5926	0.861	0.93985	0.93925	1	0.99525	1	1
IESPGM.PTET51.1.12.204502	Early	1	1	1	0.99335	0.1999	0.32825	0.5433	0.858	0.85715	0.97155	0.9644	1	1	1	1
IESPGM.PTET51.1.12.205371	Early	1	1	1	1	0.1482	0.16025	0.5402	0.7115	0.822	0.9265	0.9692	1	0.9939	1	1
IESPGM.PTET51.1.12.208622	Early	1	0.99105	1	1	0.165	0.2808	0.5563	0.79705	0.90135	0.9735	1	1	1	1	1
IESPGM.PTET51.1.12.213008	Early	0.9846	1	1	1	0.2098	0.32045	0.73855	0.88055	0.9684	0.9922	0.9881	0.99305	1	1	1
IESPGM.PTET51.1.12.223681	Early	1	1	1	1	0.12855	0.15375	0.27735	0.5778	0.79025	0.9694	0.97945	0.9724	0.99425	0.9918	1
IESPGM.PTET51.1.12.226178	Early	1	0.9873	0.99325	1	0.20445	0.10765	0.66	0.76625	0.80525	0.94495	0.95515	0.9833	1	1	1
IESPGM.PTET51.1.12.235059	Early	1	1	1	1	0.14625	0.1766	0.4415	0.7511	0.7416	0.9759	0.9069	0.97445	1	1	1
IESPGM.PTET51.1.12.23561	Early	1	1	0.9853	0.9942	0.20305	0.2667	0.64645	0.8	0.87325	0.95	0.99285	0.9667	1	1	1
IESPGM.PTET51.1.12.235955	Early	1	1	1	1	0.0245	0.16475	0.43145	0.58745	0.6637	0.92455	0.9942	0.99375	0.9615	1	0.9904
IESPGM.PTET51.1.12.237940	Early	1	1	1	1	0.13055	0.29305	0.5942	0.72	0.9444	0.97565	0.9914	1	1	0.9904	0.9949
IESPGM.PTET51.1.12.238047	Early	1	1	1	1	0.08745	0.21375	0.6313	0.85535	0.9018	0.98415	1	1	0.99375	1	0.9959
IESPGM.PTET51.1.12.242347	Early	1	1	1	1	0.199	0.13245	0.38895	0.49495	0.7363	0.9768	0.9746	1	1	1	1
IESPGM.PTET51.1.12.242720	Early	1	1	1	1	0.16005	0.3222	0.57475	0.62985	0.8562	0.8917	0.89915	1	0.9861	1	1
IESPGM.PTET51.1.12.245934	Early	1	1	1	1	0.15915	0.02185	0.2827	0.55995	0.88255	0.9361	0.98455	1	1	1	1
IESPGM.PTET51.1.12.247312	Early	1	0.99075	0.9878	1	0.0734	0.34435	0.72765	0.84445	0.9603	0.9851	1	1	1	1	1
IESPGM.PTET51.1.12.253905	Early	1	1	1	1	0.16845	0.29395	0.69015	0.90325	0.95735	1	0.99325	0.99265	0.98795	0.9863	1
IESPGM.PTET51.1.12.257043	Early	1	1	1	0.9939	0.3106	0.44335	0.6511	0.77445	0.8696	0.8973	0.99165	0.96455	0.94415	1	0.9714
IESPGM.PTET51.1.12.260178	Early	1	1	0.9861	1	0.1193	0.40105	0.70865	0.8856	0.9733	1	1	0.9922	1	1	1
IESPGM.PTET51.1.12.267827	Early	1	1	1	1	0.1578	0.1548	0.4393	0.5619	0.85195	0.903	0.92555	0.9625	0.98925	0.98865	1
IESPGM.PTET51.1.12.268792	Early	1	0.9896	0.99375	1	0.2978	0.2228	0.6316	0.87585	0.9516	0.99	0.994	1	1	1	1
IESPGM.PTET51.1.12.270644	Early	1	1	1	1	0.21835	0.3624	0.6363	0.75555	0.8916	0.9718	1	0.98115	1	1	1
IESPGM.PTET51.1.12.272893	Early	1	1	0.9914	1	0.2885	0.2885	0.6584	0.86235	0.8897	1	1	1	1	1	1
IESPGM.PTET51.1.12.27508	Early	1	1	0.9844	0.9939	0.14565	0.20435	0.42205	0.5653	0.8821	0.95335	0.95715	1	1	1	1
IESPGM.PTET51.1.12.28085	Early	1	0.94915	1	1	0	0.01995	0.29475	0.60555	0.93465	0.9865	0.9334	0.9902	1	1	1
IESPGM.PTET51.1.12.282319	Early	1	1	1	0.9881	0.0283	0.10225	0.3094	0.68725	0.85335	0.8826	0.92855	1	1	1	1
IESPGM.PTET51.1.12.283548	Early	1	0.9839	0.9909	1	0.2219	0.2549	0.5651	0.82255	0.98385	0.9836	1	0.9918	1	1	1
IESPGM.PTET51.1.12.29119	Early	1	1	1	1	0.28895	0.14665	0.63825	0.9494	0.9427	0.9804	1	1	1	1	1
IESPGM.PTET51.1.12.296441	Early	1	1	0.98865	1	0.25065	0.42555	0.626	0.7571	0.95245	0.9756	1	1	1	1	1
IESPGM.PTET51.1.12.307343	Early	0.9953	1	1	1	0.2367	0.34955	0.5427	0.70335	0.85555	0.9718	1	1	1	1	1
IESPGM.PTET51.1.12.31187	Early	1	1	1	1	0.26735	0.2387	0.4453	0.63565	0.76175	0.8929	0.913	0.99275	1	1	1
IESPGM.PTET51.1.12.313887	Early	1	1	1	1	0.09335	0.21775	0.65685	0.86485	0.9607	1	1	1	1	1	0.9944
IESPGM.PTET51.1.12.314893	Early	1	1	1	0.9958	0.09675	0.2985	0.49285	0.85315	0.9049	0.972	0.98635	1	1	0.99125	1
IESPGM.PTET51.1.12.31551	Early	1	1	0.99105	1	0.0678000000000001	0.25215	0.50905	0.75305	0.91015	0.9546	1	0.9872	1	1	1
IESPGM.PTET51.1.12.316000	Early	1	1	1	1	0.14745	0.16	0.3572	0.61075	0.92075	0.9423	1	1	1	1	1
IESPGM.PTET51.1.12.317176	Early	1	0.99295	1	0.99295	0.0626	0.0995	0.38255	0.5441	0.80595	0.9324	0.9762	0.9922	0.9855	1	1
IESPGM.PTET51.1.12.318241	Early	1	1	0.98	1	0.12855	0.20015	0.54185	0.67375	0.86035	0.9392	0.8781	1	1	1	0.99255
IESPGM.PTET51.1.12.318476	Early	1	1	0.9821	1	0.2624	0.11965	0.36395	0.8	1	1	0.95455	1	1	1	1
IESPGM.PTET51.1.12.326318	Early	1	1	0.9875	0.99325	0.069	0.18835	0.5159	0.6508	0.70865	0.9508	0.9299	0.9825	1	1	0.995
IESPGM.PTET51.1.12.331129	Early	1	1	0.9828	1	0.1601	0.2934	0.54285	0.8035	0.9765	0.963	0.9859	1	1	1	1
IESPGM.PTET51.1.12.331172	Early	1	1	0.9859	1	0.05185	0.1453	0.4598	0.8158	0.8961	0.96405	1	1	0.9934	1	1
IESPGM.PTET51.1.12.332645	Early	1	1	1	1	0.15175	0.24075	0.62025	0.8692	0.9898	0.97875	1	1	1	0.99	1
IESPGM.PTET51.1.12.332830	Early	1	1	1	1	0.2543	0.18975	0.79	0.8919	0.95405	0.9633	1	0.9815	1	1	1
IESPGM.PTET51.1.12.332843	Early	1	1	1	1	0.1862	0.2009	0.5865	0.843	0.96335	0.99125	1	1	1	1	1
IESPGM.PTET51.1.12.333950	Early	0.99405	1	0.9844	0.99475	0.03745	0.15575	0.4344	0.624	0.9633	0.90735	1	1	0.9941	1	1
IESPGM.PTET51.1.12.334719	Early	1	0.9873	1	1	0.06745	0.1475	0.38985	0.51905	0.81475	0.9121	0.8801	0.98935	1	1	0.995
IESPGM.PTET51.1.12.33744	Early	1	1	0.99385	1	0.1283	0.20145	0.55025	0.8552	0.9128	0.9922	0.99285	1	1	1	1
IESPGM.PTET51.1.12.342386	Early	1	1	1	1	0.2801	0.2663	0.68695	0.87695	0.9892	0.99205	1	1	1	1	0.9949
IESPGM.PTET51.1.12.344072	Early	1	1	0.9868	1	0.1189	0.20595	0.46855	0.7273	0.8904	0.9716	1	1	1	1	1
IESPGM.PTET51.1.12.344780	Early	1	1	0.9855	1	0.1499	0.07085	0.48085	0.46165	0.8467	0.97135	0.97755	1	1	1	1
IESPGM.PTET51.1.12.363792	Early	1	1	1	1	0.18695	0.36455	0.56015	0.7288	0.7947	0.88165	0.93335	1	1	1	1
IESPGM.PTET51.1.12.366211	Early	1	1	0.95145	1	0.13795	0.3235	0.5717	0.706	0.83445	0.9272	0.99105	0.97445	0.99265	1	1
IESPGM.PTET51.1.12.367423	Early	1	1	1	1	0.1642	0.1845	0.45115	0.51485	0.7099	0.8842	1	1	0.97875	1	0.9898
IESPGM.PTET51.1.12.367880	Early	1	1	1	1	0.1154	0.1693	0.30435	0.5716	0.69735	0.9558	0.87925	0.995	0.99375	1	1
IESPGM.PTET51.1.12.368648	Early	1	1	0.9918	0.995	0.1522	0.1089	0.4268	0.7332	0.8594	0.9537	0.98075	0.9935	0.9882	1	1
IESPGM.PTET51.1.12.373232	Early	1	1	0.9861	1	0.15275	0.25575	0.4439	0.7608	0.89785	0.972	1	1	1	0.99	1
IESPGM.PTET51.1.12.377559	Early	0.9902	1	0.9922	1	0.0830500000000001	0.2001	0.7007	0.8409	0.95495	0.98245	0.97855	0.99255	1	1	1
IESPGM.PTET51.1.12.379744	Early	1	1	1	1	0.0587	0.38885	0.6046	0.9048	0.99505	0.99105	1	1	1	1	1
IESPGM.PTET51.1.12.379767	Early	1	1	0.98275	1	0.11795	0.1559	0.17855	0.62095	0.8286	0.85335	0.93835	0.9877	1	1	1
IESPGM.PTET51.1.12.406106	Early	1	1	1	1	0.08575	0.2152	0.30385	0.61115	0.9217	0.99325	1	1	1	0.9796	1
IESPGM.PTET51.1.12.41047	Early	1	1	1	0.98865	0.53845	0.4226	0.5523	0.61505	0.8875	0.94205	0.9846	1	0.9776	1	1
IESPGM.PTET51.1.12.416705	Early	1	1	0.99335	1	0.18655	0.1443	0.3306	0.6921	0.9432	0.99205	1	0.9936	1	1	0.9958
IESPGM.PTET51.1.12.41745	Early	1	1	1	1	0.11785	0.2549	0.763	0.765	1	0.99055	0.95895	0.9934	1	1	1
IESPGM.PTET51.1.12.419011	Early	1	1	1	1	0.0675	0.27715	0.51575	0.85955	0.98395	0.99255	0.9802	1	1	1	1
IESPGM.PTET51.1.12.424841	Early	1	1	1	1	0.16145	0.1168	0.5908	0.7522	0.91485	0.9745	1	1	1	1	1
IESPGM.PTET51.1.12.427872	Early	1	1	1	1	0.1964	0.379	0.6438	0.85835	0.9756	0.99	1	0.99335	1	1	1
IESPGM.PTET51.1.12.43044	Early	1	1	0.9841	1	0.18375	0.2476	0.58585	0.7943	0.941	0.99	1	1	1	1	1
IESPGM.PTET51.1.12.435819	Early	1	0.9861	1	1	0.29635	0.24365	0.4575	0.52925	0.7015	0.94135	0.95735	0.9714	0.9846	0.9839	0.9873
IESPGM.PTET51.1.12.436477	Early	1	1	1	1	0.2243	0.23085	0.6373	0.79455	0.977	1	1	1	0.99555	1	1
IESPGM.PTET51.1.12.43999	Early	1	0.99335	0.9868	1	0.10085	0.33305	0.6155	0.7768	0.86335	0.9853	0.95845	1	1	1	1
IESPGM.PTET51.1.12.443676	Early	1	0.99205	1	0.9918	0.1654	0.18605	0.31965	0.5563	0.7551	0.8742	0.98735	0.9862	1	1	1
IESPGM.PTET51.1.12.448907	Early	1	1	0.9935	1	0.1042	0.20955	0.4103	0.76525	0.9389	1	1	0.9863	1	1	0.9898
IESPGM.PTET51.1.12.450918	Early	1	0.94445	1	0.9888	0.1274	0.2133	0.52635	0.73985	0.7359	0.93135	1	1	1	1	1
IESPGM.PTET51.1.12.454157	Early	0.9792	1	1	0.88505	0.2688	0.33985	0.59245	0.7364	0.9342	0.8966	0.91725	1	0.88035	0.96715	0.94125
IESPGM.PTET51.1.12.47709	Early	1	0.99265	1	1	0.13095	0.0901000000000001	0.5592	0.6726	0.9129	0.9855	1	1	1	1	1
IESPGM.PTET51.1.12.491269	Early	1	1	1	1	0.1369	0.1351	0.64105	0.81	0.9881	0.9923	0.94935	1	1	1	1
IESPGM.PTET51.1.12.523010	Early	1	1	1	1	0.1354	0.2323	0.458	0.6863	0.85885	0.9909	0.9737	0.9579	1	1	1
IESPGM.PTET51.1.12.523656	Early	1	0.95	1	1	0.06735	0.2247	0.62485	0.83495	0.9569	1	1	1	1	1	0.9892
IESPGM.PTET51.1.12.525755	Early	1	1	1	0.9761	0.0759000000000001	0.227	0.6958	0.60805	0.75905	0.92495	1	1	1	1	1
IESPGM.PTET51.1.12.538447	Early	1	0.9767	1	1	0.1905	0.2656	0.6462	0.6931	0.94745	0.96185	0.9508	1	1	1	1
IESPGM.PTET51.1.12.545416	Early	0.995	1	0.9857	1	0.23945	0.2167	0.31375	0.6557	0.7354	0.86235	0.8484	0.98505	1	0.9815	0.9914
IESPGM.PTET51.1.12.548663	Early	0.99125	1	1	1	0.16215	0.33425	0.47055	0.6519	0.91215	0.94135	0.98115	1	0.975	1	0.9885
IESPGM.PTET51.1.12.552217	Early	1	1	0.99125	0.98665	0.06545	0.15555	0.51955	0.7673	0.9198	0.97905	0.98	1	0.98	1	1
IESPGM.PTET51.1.12.56132	Early	1	0.9896	1	1	0.10025	0.243	0.375	0.75455	0.8671	0.9324	0.97875	0.9667	1	1	1
IESPGM.PTET51.1.12.562243	Early	1	0.9524	1	1	0.17145	0.2144	0.7646	0.835	0.9331	1	0.9707	1	1	1	1
IESPGM.PTET51.1.12.562832	Early	1	1	0.9807	1	0.13205	0.33375	0.5006	0.61685	0.64425	0.8573	0.93865	0.9615	0.9672	1	0.9906
IESPGM.PTET51.1.12.575473	Early	1	1	1	1	0.0762499999999999	0.14745	0.58165	0.61325	0.7548	0.9458	0.98765	0.9825	0.987	1	0.9888
IESPGM.PTET51.1.12.577110	Early	1	0.99295	1	1	0.0832999999999999	0.2111	0.75715	0.9155	0.9837	0.99365	0.9853	1	1	1	0.99535
IESPGM.PTET51.1.12.58416	Early	1	1	1	1	0.09045	0.391	0.6386	0.88675	0.9885	0.972	1	1	1	1	1
IESPGM.PTET51.1.12.61805	Early	1	1	0.99155	1	0.0767	0.25955	0.27985	0.65485	0.78685	0.9699	0.9646	0.9749	1	1	0.9894
IESPGM.PTET51.1.12.634140	Early	1	1	1	1	0.14855	0.2881	0.48685	0.5781	0.79905	0.9643	0.931	0.97525	1	1	1
IESPGM.PTET51.1.12.63901	Early	1	1	1	0.99335	0.17415	0.0952	0.50015	0.8138	0.97885	1	1	0.97645	1	1	1
IESPGM.PTET51.1.12.65661	Early	1	1	1	1	0.0569	0.1071	0.1819	0.5985	0.8436	0.9184	0.87785	1	0.9733	1	1
IESPGM.PTET51.1.12.67349	Early	1	1	1	1	0.176	0.23425	0.49145	0.6792	0.75905	0.9649	0.9545	1	0.99315	1	1
IESPGM.PTET51.1.12.6769	Early	1	0.9722	0.9756	0.9804	0.24145	0.4359	0.6817	0.69835	0.8989	0.9722	0.9885	1	1	1	1
IESPGM.PTET51.1.12.67840	Early	1	1	1	1	0.1626	0.1035	0.36255	0.5833	0.7005	0.95255	0.9647	1	1	1	1
IESPGM.PTET51.1.12.79092	Early	1	1	1	0.9932	0.18875	0.2955	0.62195	0.79395	0.9565	0.9799	0.9796	1	1	0.9918	1
IESPGM.PTET51.1.12.8726	Early	1	1	1	1	0.0388999999999999	0.2232	0.4922	0.7389	0.9365	0.98935	1	1	1	1	1
IESPGM.PTET51.1.12.87592	Early	1	1	1	1	0.32665	0.4545	0.49735	0.7634	0.81955	0.94495	0.9235	0.96555	0.9718	1	1
IESPGM.PTET51.1.12.91800	Early	1	1	1	0.9914	0.1802	0.15155	0.4746	0.58055	0.8943	0.97035	0.93435	1	1	1	0.9906
IESPGM.PTET51.1.12.92664	Early	1	1	1	1	0.09575	0.2316	0.4936	0.75595	0.82045	0.9683	0.9526	1	0.9839	1	1
IESPGM.PTET51.1.120.10267	Early	1	1	1	0.9865	0.25075	0.30395	0.7408	0.7742	0.977	1	1	1	1	1	1
IESPGM.PTET51.1.120.105518	Early	1	1	1	1	0.18425	0.25035	0.5671	0.8873	0.97915	0.97845	1	1	0.9943	1	1
IESPGM.PTET51.1.120.108642	Early	1	1	1	1	0.20415	0.1531	0.21595	0.71845	0.78975	0.9173	0.92755	0.9873	0.9665	1	0.99565
IESPGM.PTET51.1.120.111791	Early	1	1	1	1	0.0747	0.114	0.23065	0.60545	0.9106	0.9494	0.9821	0.9821	0.9884	1	1
IESPGM.PTET51.1.120.111820	Early	1	1	1	1	0.0646	0.1786	0.267	0.68105	0.89945	0.9623	1	1	1	1	1
IESPGM.PTET51.1.120.115968	Early	1	0.97945	1	1	0.0305500000000001	0.18185	0.4233	0.7245	0.7813	0.95425	1	0.96785	1	1	1
IESPGM.PTET51.1.120.119053	Early	1	1	1	0.988	0.0842000000000001	0.12615	0.5296	0.6912	0.9284	0.9839	1	1	1	1	1
IESPGM.PTET51.1.120.124426	Early	1	1	0.9944	1	0.1722	0.32435	0.4882	0.7083	0.8064	0.9612	1	0.9857	1	1	0.99625
IESPGM.PTET51.1.120.125584	Early	1	1	0.9865	1	0.11225	0.1786	0.3585	0.59915	0.954	0.99155	1	1	1	1	1
IESPGM.PTET51.1.120.1260	Early	1	1	1	1	0.19	0.32085	0.62385	0.75	0.9817	1	1	0.99335	0.9839	1	0.99485
IESPGM.PTET51.1.120.127851	Early	1	1	0.9767	0.9882	0.0755	0.3501	0.6875	0.83575	0.9518	0.98665	1	1	0.99265	1	1
IESPGM.PTET51.1.120.129504	Early	1	1	1	1	0.137	0.3607	0.5792	0.8339	0.93905	0.9918	0.9778	1	1	1	1
IESPGM.PTET51.1.120.133017	Early	1	1	0.9942	1	0.15405	0.2318	0.45175	0.65105	0.9382	0.9799	1	1	0.9458	0.9714	1
IESPGM.PTET51.1.120.13833	Early	1	1	1	1	0.0387	0.1412	0.41205	0.4157	0.7241	0.9649	1	0.9566	0.99285	1	1
IESPGM.PTET51.1.120.144372	Early	1	1	1	0.987	0.0830500000000001	0.25795	0.31595	0.73775	0.814	0.91005	0.86025	0.9877	0.95105	1	1
IESPGM.PTET51.1.120.149428	Early	1	1	0.9851	1	0.1127	0.2393	0.60895	0.76665	0.83915	0.97095	1	1	1	1	1
IESPGM.PTET51.1.120.15167	Early	1	1	0.99315	0.9827	0.1257	0.21	0.5568	0.68505	0.971	1	1	1	1	1	1
IESPGM.PTET51.1.120.159479	Early	1	0.98305	0.99315	0.9918	0.184	0.1456	0.68385	0.8462	0.9153	0.9859	1	1	1	1	1
IESPGM.PTET51.1.120.159785	Early	1	1	0.99295	1	0.24785	0.22235	0.6434	0.87945	0.9879	1	1	1	1	1	1
IESPGM.PTET51.1.120.159913	Early	1	1	1	1	0.21965	0.18215	0.4075	0.7407	0.98	0.9756	0.9571	0.99375	0.9853	1	1
IESPGM.PTET51.1.120.16263	Early	1	1	1	1	0.3316	0.40715	0.51645	0.7212	0.91505	0.9565	1	1	1	1	1
IESPGM.PTET51.1.120.180937	Early	1	1	0.99275	1	0.1567	0.21535	0.7435	0.822	0.9695	0.99285	1	1	1	1	1
IESPGM.PTET51.1.120.18138	Early	1	1	1	0.99285	0.1456	0.1471	0.5254	0.6875	0.82235	0.93705	1	1	0.99385	1	1
IESPGM.PTET51.1.120.18534	Early	1	1	1	1	0.2227	0.28815	0.5532	0.8078	0.90375	0.93915	1	1	0.99315	1	1
IESPGM.PTET51.1.120.19563	Early	1	1	1	1	0.0925499999999999	0.22855	0.6766	0.83835	0.958	0.9922	1	1	1	1	1
IESPGM.PTET51.1.120.195946	Early	1	1	0.98915	1	0.14075	0.20135	0.393	0.7037	0.8986	0.9754	1	0.9865	1	1	1
IESPGM.PTET51.1.120.199845	Early	1	1	1	1	0.08055	0.1344	0.55135	0.6262	0.79215	0.96775	0.91345	1	1	1	0.99475
IESPGM.PTET51.1.120.20007	Early	1	1	1	1	0.16435	0.3655	0.6231	0.8727	0.96	0.96	1	0.9836	1	1	1
IESPGM.PTET51.1.120.210160	Early	1	0.97435	0.99265	1	0.07225	0.1017	0.3842	0.55415	0.65375	0.89425	1	0.9592	1	1	1
IESPGM.PTET51.1.120.216256	Early	1	1	1	1	0.2672	0.3077	0.6575	0.83005	0.88595	0.9855	1	0.9841	1	1	1
IESPGM.PTET51.1.120.219935	Early	0.98835	1	0.9939	1	0.29655	0.2295	0.68955	0.74175	0.80895	0.9357	0.93055	1	0.985	1	1
IESPGM.PTET51.1.120.236329	Early	1	1	0.99455	1	0.2002	0.29855	0.63755	0.894	1	0.97305	1	1	1	1	1
IESPGM.PTET51.1.120.239260	Early	1	1	1	1	0.2453	0.3373	0.56585	0.7797	0.986	0.9898	1	1	0.99315	1	1
IESPGM.PTET51.1.120.240849	Early	1	1	1	1	0.13325	0.15805	0.4049	0.7196	0.8828	0.9623	0.9603	0.987	1	1	0.9941
IESPGM.PTET51.1.120.249495	Early	1	1	0.9918	1	0.2528	0.1999	0.72775	0.8384	0.9596	0.97715	1	1	1	0.9909	1
IESPGM.PTET51.1.120.25601	Early	1	1	0.9885	1	0.09345	0.1318	0.30815	0.4377	0.82155	0.9804	0.9904	1	1	1	1
IESPGM.PTET51.1.120.26357	Early	1	1	1	1	0.111	0.23875	0.39925	0.61965	0.91595	0.9923	0.96565	1	1	1	1
IESPGM.PTET51.1.120.30609	Early	1	1	1	1	0.29165	0.3193	0.66195	0.7463	0.95395	0.9918	1	1	1	1	1
IESPGM.PTET51.1.120.31672	Early	1	1	0.9785	0.9867	0.14435	0.18235	0.57425	0.73765	0.7561	0.9817	0.9589	1	1	1	1
IESPGM.PTET51.1.120.31911	Early	1	1	1	1	0.2223	0.2222	0.54285	0.56355	0.84035	0.92085	0.974	1	1	1	0.9886
IESPGM.PTET51.1.120.34925	Early	1	1	1	1	0.02105	0.13005	0.3652	0.76845	0.88925	0.99125	1	1	1	1	0.99315
IESPGM.PTET51.1.120.35130	Early	1	0.99505	1	1	0.1819	0.23635	0.59165	0.7903	0.98295	1	1	0.9909	1	1	1
IESPGM.PTET51.1.120.38267	Early	1	1	1	0.9903	0.1409	0.1631	0.3513	0.5335	0.8179	0.9665	0.9787	1	0.9942	1	1
IESPGM.PTET51.1.120.41310	Early	1	1	0.9841	1	0.13085	0.0624	0.32	0.6671	0.85275	0.974	0.9758	1	1	1	1
IESPGM.PTET51.1.120.419	Early	1	1	1	1	0.07595	0.154	0.35825	0.5857	0.71115	0.8739	0.9118	0.9846	0.99265	1	1
IESPGM.PTET51.1.120.42438	Early	1	1	0.9844	1	0.02335	0.1556	0.62635	0.7484	0.9067	0.9492	1	1	1	1	0.99205
IESPGM.PTET51.1.120.46180	Early	1	1	1	1	0.12055	0.1113	0.4215	0.47745	0.8153	0.93585	0.9237	0.9811	0.9855	1	1
IESPGM.PTET51.1.120.47349	Early	1	1	1	1	0.0857	0.16825	0.35155	0.5626	0.7958	0.9106	0.9519	1	0.9914	1	1
IESPGM.PTET51.1.120.49860	Early	1	1	1	1	0.14655	0.16515	0.5753	0.4914	0.8207	0.91955	0.98385	0.99405	1	1	1
IESPGM.PTET51.1.120.50804	Early	1	1	0.9844	0.9914	0.15915	0.13775	0.5732	0.7076	0.88555	0.91895	0.9625	0.99125	1	1	0.9952
IESPGM.PTET51.1.120.51978	Early	1	1	0.99155	1	0.0872999999999999	0.1325	0.43465	0.6534	0.94935	0.97205	0.8951	0.9902	1	1	1
IESPGM.PTET51.1.120.52697	Early	1	1	0.9801	1	0.2569	0.1429	0.5983	0.8121	0.9577	1	1	1	1	1	1
IESPGM.PTET51.1.120.52865	Early	1	1	0.9953	1	0.1571	0.13285	0.5106	0.8226	0.92665	0.969	1	1	1	1	1
IESPGM.PTET51.1.120.58798	Early	1	1	1	1	0.1947	0.0444	0.5	0.72745	0.93045	0.99205	1	1	1	1	1
IESPGM.PTET51.1.120.59779	Early	1	1	0.99475	1	0.1252	0.0865499999999999	0.37265	0.5601	0.75495	0.9865	0.9412	1	1	1	1
IESPGM.PTET51.1.120.64161	Early	1	1	1	0.99425	0.17415	0.29285	0.5612	0.82855	0.9125	0.9607	0.9446	1	1	1	1
IESPGM.PTET51.1.120.64280	Early	1	1	1	0.9941	0.04135	0.3717	0.2652	0.5221	0.88025	0.9394	0.97145	0.99125	1	1	1
IESPGM.PTET51.1.120.64720	Early	1	1	0.9923	1	0.1699	0.20525	0.38135	0.5876	0.88685	0.9859	0.97855	1	1	1	0.99485
IESPGM.PTET51.1.120.64982	Early	1	1	0.9941	1	0.225	0.3383	0.5193	0.93	0.98695	1	1	0.9853	0.99335	1	1
IESPGM.PTET51.1.120.65885	Early	1	1	1	1	0.18545	0.37645	0.7089	0.8923	0.9189	0.9831	1	0.9846	1	1	1
IESPGM.PTET51.1.120.67491	Early	1	1	0.99195	0.98915	0.1434	0.0996	0.4163	0.7247	0.99265	0.98	0.99315	1	1	1	0.9935
IESPGM.PTET51.1.120.74532	Early	1	1	0.9851	1	0.14675	0.2487	0.6674	0.77215	0.9184	1	0.9607	0.97845	1	1	1
IESPGM.PTET51.1.120.77531	Early	1	1	0.9918	1	0.069	0.1672	0.56255	0.66325	0.89455	0.9804	1	0.9773	0.9697	1	0.987
IESPGM.PTET51.1.120.77566	Early	1	1	0.99105	1	0.1478	0.24175	0.72905	0.59855	0.89005	1	0.9898	1	1	1	1
IESPGM.PTET51.1.120.78091	Early	1	1	1	1	0.1297	0.35345	0.5001	0.71995	0.9236	0.9783	0.93925	1	0.99375	1	1
IESPGM.PTET51.1.120.78985	Early	1	1	1	1	0.2192	0.32105	0.6297	0.7161	0.8929	0.98415	0.9583	1	1	1	1
IESPGM.PTET51.1.120.79100	Early	1	1	1	1	0.1468	0.2993	0.5221	0.78405	0.8467	0.9474	0.98765	1	1	0.9902	1
IESPGM.PTET51.1.120.83463	Early	1	1	0.99285	0.9941	0.0844	0.26725	0.67615	0.9233	0.96735	0.97785	1	1	1	1	1
IESPGM.PTET51.1.120.86229	Early	1	1	1	1	0.14815	0.27955	0.47315	0.80275	0.92645	0.96185	0.9169	0.9924	1	1	0.99365
IESPGM.PTET51.1.120.88811	Early	1	0.9911	0.99335	1	0.15535	0.1984	0.35725	0.5903	0.63985	0.89825	0.9163	1	0.97965	0.9857	1
IESPGM.PTET51.1.120.90685	Early	1	1	0.97715	0.99485	0.10685	0.43115	0.67955	0.83135	0.96505	0.9577	0.9583	1	1	1	1
IESPGM.PTET51.1.120.93798	Early	1	1	1	1	0.0771500000000001	0.22135	0.5519	0.83915	0.9853	1	1	1	1	1	1
IESPGM.PTET51.1.120.94585	Early	1	1	0.9855	0.98415	0.0425	0.13765	0.2985	0.6239	0.821	0.93475	0.8003	0.96245	0.9842	1	0.9901
IESPGM.PTET51.1.120.97203	Early	1	1	0.9867	1	0.1212	0.17965	0.53665	0.69785	0.88015	0.94635	0.9287	0.9844	1	1	1
IESPGM.PTET51.1.120.99929	Early	1	1	0.9855	1	0.34305	0.2715	0.5435	0.9107	0.9442	1	1	0.9881	1	1	1
IESPGM.PTET51.1.121.109410	Early	1	1	0.9922	1	0.15095	0.1653	0.30835	0.5926	0.61155	0.9585	1	0.9881	1	1	0.987
IESPGM.PTET51.1.121.110187	Early	1	1	0.9914	1	0.1	0.2261	0.5454	0.7636	0.96325	0.9875	0.964	0.9828	1	1	1
IESPGM.PTET51.1.121.112322	Early	1	1	1	1	0.1286	0.24105	0.48705	0.66075	0.79075	0.93705	0.9881	1	1	1	1
IESPGM.PTET51.1.121.112711	Early	1	1	1	1	0.18575	0.2449	0.4718	0.77275	0.783	0.94765	1	1	1	1	1
IESPGM.PTET51.1.121.113275	Early	1	1	1	0.99275	0.0463	0.21625	0.46845	0.64805	0.9171	1	1	0.9836	1	1	1
IESPGM.PTET51.1.121.114348	Early	1	1	0.99315	1	0.2028	0.4138	0.65255	0.8194	0.9272	0.91935	1	0.9889	1	1	1
IESPGM.PTET51.1.121.114945	Early	1	1	0.99385	0.9902	0.1819	0.22675	0.3536	0.57635	0.83155	0.879	0.96015	1	1	1	0.9894
[truncated: 42,930 more rows]
