# Supplementary material for: Developmental timing of programmed DNA elimination in Paramecium tetraurelia recapitulates germline transposon evolutionary dynamics
Source: HighWire-hosted journal article supplement (doi:10.1101/gr.277027.122), 2022-11-01
Supplement: Supplemental_Table_S4.xlsx [file Supplemental_Table_S4.xlsx]

## Sheet: Supp Table S4
Supplemental Table S4. List of internal IESs in MIC-specific regions.
NAME	SEQ_ID	START	END	LENGTH	BOUNDARY_RELATION	TYPE	IES_ID	IES_LENGTH	DIFF_LENGTH
NestIES.PTET51.1.1.253787.253813	scaffold51_1_with_IES	253787	253813	27	internal	Nested	IESPGM.PTET51.1.1.239006	55	28
JuxtIES.PTET51.1.1.340827.340953	scaffold51_1_with_IES	340827	340953	127	left_internal	Juxtaposed	IESPGM.PTET51.1.1.320884	242	115
JuxtIES.PTET51.1.10.256147.256415	scaffold51_10_with_IES	256147	256415	269	right_internal	Juxtaposed	IESPGM.PTET51.1.10.242438	368	99
JuxtIES.PTET51.1.10.360491.360600	scaffold51_10_with_IES	360491	360600	110	right_internal	Juxtaposed	IESPGM.PTET51.1.10.341648	154	44
NestIES.PTET51.1.100.145786.145812	scaffold51_100_with_IES	145786	145812	27	internal	Nested	IESPGM.PTET51.1.100.139907	260	233
NestIES.PTET51.1.101.265835.265942	scaffold51_101_with_IES	265835	265942	108	internal	Nested	IESPGM.PTET51.1.101.254221	153	45
NestIES.PTET51.1.102.271072.271120	scaffold51_102_with_IES	271072	271120	49	internal	Nested	IESPGM.PTET51.1.102.257909	145	96
JuxtIES.PTET51.1.102.40115.40159	scaffold51_102_with_IES	40115	40159	45	right_internal	Juxtaposed	IESPGM.PTET51.1.102.39164	71	26
JuxtIES.PTET51.1.103.198027.198071	scaffold51_103_with_IES	198027	198071	45	left_internal	Juxtaposed	IESPGM.PTET51.1.103.183611	75	30
JuxtIES.PTET51.1.104.254960.255015	scaffold51_104_with_IES	254960	255015	56	right_internal	Juxtaposed	IESPGM.PTET51.1.104.239394	85	29
NestIES.PTET51.1.104.79281.79307	scaffold51_104_with_IES	79281	79307	27	internal	Nested	IESPGM.PTET51.1.104.75067	261	234
NestIES.PTET51.1.106.305817.305845	scaffold51_106_with_IES	305817	305845	29	internal	Nested	IESPGM.PTET51.1.106.288995	370	341
JuxtIES.PTET51.1.108.132942.133024	scaffold51_108_with_IES	132942	133024	83	right_internal	Juxtaposed	IESPGM.PTET51.1.108.126146	112	29
JuxtIES.PTET51.1.11.249303.249328	scaffold51_11_with_IES	249303	249328	26	left_internal	Juxtaposed	IESPGM.PTET51.1.11.242644	124	98
NestIES.PTET51.1.11.581262.581378	scaffold51_11_with_IES	581262	581378	117	internal	Nested	IESPGM.PTET51.1.11.560969	146	29
NestIES.PTET51.1.11.677641.677684	scaffold51_11_with_IES	677641	677684	44	internal	Nested	IESPGM.PTET51.1.11.652455	73	29
NestIES.PTET51.1.110.95823.95850	scaffold51_110_with_IES	95823	95850	28	internal	Nested	IESPGM.PTET51.1.110.92583	58	30
JuxtIES.PTET51.1.111.147614.147743	scaffold51_111_with_IES	147614	147743	130	left_internal	Juxtaposed	IESPGM.PTET51.1.111.137440	214	84
NestIES.PTET51.1.111.234316.234464	scaffold51_111_with_IES	234316	234464	149	internal	Nested	IESPGM.PTET51.1.111.219834	302	153
JuxtIES.PTET51.1.111.57473.57517	scaffold51_111_with_IES	57473	57517	45	right_internal	Juxtaposed	IESPGM.PTET51.1.111.53314	72	27
JuxtIES.PTET51.1.112.157597.157622	scaffold51_112_with_IES	157597	157622	26	right_internal	Juxtaposed	IESPGM.PTET51.1.112.148677	70	44
NestIES.PTET51.1.117.44400.44507	scaffold51_117_with_IES	44400	44507	108	internal	Nested	IESPGM.PTET51.1.117.42126	184	76
NestIES.PTET51.1.118.248206.248323	scaffold51_118_with_IES	248206	248323	118	internal	Nested	IESPGM.PTET51.1.118.237074	183	65
JuxtIES.PTET51.1.119.118806.118902	scaffold51_119_with_IES	118806	118902	97	left_internal	Juxtaposed	IESPGM.PTET51.1.119.111914	251	154
JuxtIES.PTET51.1.12.370459.370583	scaffold51_12_with_IES	370459	370583	125	left_internal	Juxtaposed	IESPGM.PTET51.1.12.351575	220	95
NestIES.PTET51.1.121.34338.34402	scaffold51_121_with_IES	34338	34402	65	internal	Nested	IESPGM.PTET51.1.121.32070	93	28
JuxtIES.PTET51.1.121.78637.78713	scaffold51_121_with_IES	78637	78713	77	left_internal	Juxtaposed	IESPGM.PTET51.1.121.74054	126	49
JuxtIES.PTET51.1.123.80974.81001	scaffold51_123_with_IES	80974	81001	28	right_internal	Juxtaposed	IESPGM.PTET51.1.123.77315	58	30
NestIES.PTET51.1.127.12702.12727	scaffold51_127_with_IES	12702	12727	26	internal	Nested	IESPGM.PTET51.1.127.11713	702	676
JuxtIES.PTET51.1.127.78713.78772	scaffold51_127_with_IES	78713	78772	60	right_internal	Juxtaposed	IESPGM.PTET51.1.127.73807	88	28
NestIES.PTET51.1.132.43487.43513	scaffold51_132_with_IES	43487	43513	27	internal	Nested	IESPGM.PTET51.1.132.38620	349	322
NestIES.PTET51.1.132.87716.87742	scaffold51_132_with_IES	87716	87742	27	internal	Nested	IESPGM.PTET51.1.132.79777	364	337
JuxtIES.PTET51.1.134.154485.154550	scaffold51_134_with_IES	154485	154550	66	right_internal	Juxtaposed	IESPGM.PTET51.1.134.144704	143	77
NestIES.PTET51.1.136.120196.120240	scaffold51_136_with_IES	120196	120240	45	internal	Nested	IESPGM.PTET51.1.136.114880	111	66
NestIES.PTET51.1.138.202978.203006	scaffold51_138_with_IES	202978	203006	29	internal	Nested	IESPGM.PTET51.1.138.194499	136	107
NestIES.PTET51.1.139.189819.189888	scaffold51_139_with_IES	189819	189888	70	internal	Nested	IESPGM.PTET51.1.139.181340	119	49
NestIES.PTET51.1.143.188189.188214	scaffold51_143_with_IES	188189	188214	26	internal	Nested	IESPGM.PTET51.1.143.178574	1356	1330
JuxtIES.PTET51.1.148.148905.148960	scaffold51_148_with_IES	148905	148960	56	left_internal	Juxtaposed	IESPGM.PTET51.1.148.142707	82	26
JuxtIES.PTET51.1.148.207993.208049	scaffold51_148_with_IES	207993	208049	57	right_internal	Juxtaposed	IESPGM.PTET51.1.148.196875	86	29
JuxtIES.PTET51.1.150.6563.6588	scaffold51_150_with_IES	6563	6588	26	right_internal	Juxtaposed	IESPGM.PTET51.1.150.5484	92	66
JuxtIES.PTET51.1.152.231787.231813	scaffold51_152_with_IES	231787	231813	27	left_internal	Juxtaposed	IESPGM.PTET51.1.152.223530	149	122
JuxtIES.PTET51.1.155.173700.173726	scaffold51_155_with_IES	173700	173726	27	right_internal	Juxtaposed	IESPGM.PTET51.1.155.163799	140	113
NestIES.PTET51.1.161.147378.147432	scaffold51_161_with_IES	147378	147432	55	internal	Nested	IESPGM.PTET51.1.161.141502	100	45
NestIES.PTET51.1.162.147851.147899	scaffold51_162_with_IES	147851	147899	49	internal	Nested	IESPGM.PTET51.1.162.140733	78	29
JuxtIES.PTET51.1.164.65108.65133	scaffold51_164_with_IES	65108	65133	26	left_internal	Juxtaposed	IESPGM.PTET51.1.164.63497	56	30
JuxtIES.PTET51.1.164.65110.65135	scaffold51_164_with_IES	65110	65135	26	left_internal	Juxtaposed	IESPGM.PTET51.1.164.63497	56	30
JuxtIES.PTET51.1.165.17759.17784	scaffold51_165_with_IES	17759	17784	26	left_internal	Juxtaposed	IESPGM.PTET51.1.165.17175	113	87
JuxtIES.PTET51.1.165.70215.70240	scaffold51_165_with_IES	70215	70240	26	right_internal	Juxtaposed	IESPGM.PTET51.1.165.67522	70	44
NestIES.PTET51.1.166.181293.181361	scaffold51_166_with_IES	181293	181361	69	internal	Nested	IESPGM.PTET51.1.166.173684	125	56
NestIES.PTET51.1.168.145432.145506	scaffold51_168_with_IES	145432	145506	75	internal	Nested	IESPGM.PTET51.1.168.138297	121	46
JuxtIES.PTET51.1.168.42241.42285	scaffold51_168_with_IES	42241	42285	45	left_internal	Juxtaposed	IESPGM.PTET51.1.168.41124	73	28
NestIES.PTET51.1.17.359682.359708	scaffold51_17_with_IES	359682	359708	27	internal	Nested	IESPGM.PTET51.1.17.351242	229	202
JuxtIES.PTET51.1.170.39890.39981	scaffold51_170_with_IES	39890	39981	92	left_internal	Juxtaposed	IESPGM.PTET51.1.170.38337	122	30
JuxtIES.PTET51.1.171.29070.29098	scaffold51_171_with_IES	29070	29098	29	left_internal	Juxtaposed	IESPGM.PTET51.1.171.28394	107	78
JuxtIES.PTET51.1.171.65137.65183	scaffold51_171_with_IES	65137	65183	47	left_internal	Juxtaposed	IESPGM.PTET51.1.171.62393	104	57
JuxtIES.PTET51.1.178.94406.94453	scaffold51_178_with_IES	94406	94453	48	left_internal	Juxtaposed	IESPGM.PTET51.1.178.91013	120	72
JuxtIES.PTET51.1.179.1298.1389	scaffold51_179_with_IES	1298	1389	92	left_internal	Juxtaposed	IESPGM.PTET51.1.179.1187	120	28
NestIES.PTET51.1.18.362887.363015	scaffold51_18_with_IES	362887	363015	129	internal	Nested	IESPGM.PTET51.1.18.339745	259	130
NestIES.PTET51.1.18.68641.68666	scaffold51_18_with_IES	68641	68666	26	internal	Nested	IESPGM.PTET51.1.18.65263	1750	1724
NestIES.PTET51.1.183.12328.12371	scaffold51_183_with_IES	12328	12371	44	internal	Nested	IESPGM.PTET51.1.183.12247	88	44
JuxtIES.PTET51.1.2.453402.453429	scaffold51_2_with_IES	453402	453429	28	right_internal	Juxtaposed	IESPGM.PTET51.1.2.437158	73	45
JuxtIES.PTET51.1.2.721160.721189	scaffold51_2_with_IES	721160	721189	30	left_internal	Juxtaposed	IESPGM.PTET51.1.2.691430	170	140
NestIES.PTET51.1.22.267473.267620	scaffold51_22_with_IES	267473	267620	148	internal	Nested	IESPGM.PTET51.1.22.256394	193	45
NestIES.PTET51.1.22.322231.322276	scaffold51_22_with_IES	322231	322276	46	internal	Nested	IESPGM.PTET51.1.22.308174	72	26
NestIES.PTET51.1.22.389003.389028	scaffold51_22_with_IES	389003	389028	26	internal	Nested	IESPGM.PTET51.1.22.370938	251	225
NestIES.PTET51.1.23.374505.374530	scaffold51_23_with_IES	374505	374530	26	internal	Nested	IESPGM.PTET51.1.23.362798	3362	3336
JuxtIES.PTET51.1.23.450887.450995	scaffold51_23_with_IES	450887	450995	109	left_internal	Juxtaposed	IESPGM.PTET51.1.23.433806	233	124
JuxtIES.PTET51.1.24.367023.367050	scaffold51_24_with_IES	367023	367050	28	left_internal	Juxtaposed	IESPGM.PTET51.1.24.346704	104	76
NestIES.PTET51.1.25.215638.215732	scaffold51_25_with_IES	215638	215732	95	internal	Nested	IESPGM.PTET51.1.25.200235	164	69
JuxtIES.PTET51.1.25.39217.39242	scaffold51_25_with_IES	39217	39242	26	left_internal	Juxtaposed	IESPGM.PTET51.1.25.37196	84	58
NestIES.PTET51.1.26.23865.23890	scaffold51_26_with_IES	23865	23890	26	internal	Nested	IESPGM.PTET51.1.26.23572	178	152
JuxtIES.PTET51.1.26.365643.365697	scaffold51_26_with_IES	365643	365697	55	right_internal	Juxtaposed	IESPGM.PTET51.1.26.345465	84	29
JuxtIES.PTET51.1.27.324053.324078	scaffold51_27_with_IES	324053	324078	26	left_internal	Juxtaposed	IESPGM.PTET51.1.27.312682	85	59
NestIES.PTET51.1.28.152699.152724	scaffold51_28_with_IES	152699	152724	26	internal	Nested	IESPGM.PTET51.1.28.147924	225	199
JuxtIES.PTET51.1.31.386609.386665	scaffold51_31_with_IES	386609	386665	57	left_internal	Juxtaposed	IESPGM.PTET51.1.31.373045	205	148
NestIES.PTET51.1.35.179519.179563	scaffold51_35_with_IES	179519	179563	45	internal	Nested	IESPGM.PTET51.1.35.167155	89	44
NestIES.PTET51.1.35.55515.55619	scaffold51_35_with_IES	55515	55619	105	internal	Nested	IESPGM.PTET51.1.35.52332	172	67
JuxtIES.PTET51.1.36.11832.11859	scaffold51_36_with_IES	11832	11859	28	right_internal	Juxtaposed	IESPGM.PTET51.1.36.11001	57	29
JuxtIES.PTET51.1.36.313099.313127	scaffold51_36_with_IES	313099	313127	29	right_internal	Juxtaposed	IESPGM.PTET51.1.36.301005	114	85
NestIES.PTET51.1.37.458162.458190	scaffold51_37_with_IES	458162	458190	29	internal	Nested	IESPGM.PTET51.1.37.435694	77	48
JuxtIES.PTET51.1.38.132706.132734	scaffold51_38_with_IES	132706	132734	29	left_internal	Juxtaposed	IESPGM.PTET51.1.38.125308	126	97
JuxtIES.PTET51.1.39.153069.153096	scaffold51_39_with_IES	153069	153096	28	right_internal	Juxtaposed	IESPGM.PTET51.1.39.142954	84	56
JuxtIES.PTET51.1.39.376525.376748	scaffold51_39_with_IES	376525	376748	224	right_internal	Juxtaposed	IESPGM.PTET51.1.39.352324	335	111
NestIES.PTET51.1.40.157373.157399	scaffold51_40_with_IES	157373	157399	27	internal	Nested	IESPGM.PTET51.1.40.150912	55	28
NestIES.PTET51.1.40.316085.316152	scaffold51_40_with_IES	316085	316152	68	internal	Nested	IESPGM.PTET51.1.40.300641	146	78
NestIES.PTET51.1.40.357947.358020	scaffold51_40_with_IES	357947	358020	74	internal	Nested	IESPGM.PTET51.1.40.334875	160	86
JuxtIES.PTET51.1.41.320892.320963	scaffold51_41_with_IES	320892	320963	72	right_internal	Juxtaposed	IESPGM.PTET51.1.41.305650	250	178
NestIES.PTET51.1.43.417281.417348	scaffold51_43_with_IES	417281	417348	68	internal	Nested	IESPGM.PTET51.1.43.402730	153	85
JuxtIES.PTET51.1.43.462724.462790	scaffold51_43_with_IES	462724	462790	67	left_internal	Juxtaposed	IESPGM.PTET51.1.43.445881	94	27
JuxtIES.PTET51.1.45.30819.30844	scaffold51_45_with_IES	30819	30844	26	left_internal	Juxtaposed	IESPGM.PTET51.1.45.26861	54	28
JuxtIES.PTET51.1.46.255312.255359	scaffold51_46_with_IES	255312	255359	48	right_internal	Juxtaposed	IESPGM.PTET51.1.46.242351	102	54
JuxtIES.PTET51.1.5.410177.410214	scaffold51_5_with_IES	410177	410214	38	right_internal	Juxtaposed	IESPGM.PTET51.1.5.399819	93	55
NestIES.PTET51.1.5.567906.567931	scaffold51_5_with_IES	567906	567931	26	internal	Nested	IESPGM.PTET51.1.5.549471	132	106
JuxtIES.PTET51.1.5.677425.677451	scaffold51_5_with_IES	677425	677451	27	right_internal	Juxtaposed	IESPGM.PTET51.1.5.652936	102	75
NestIES.PTET51.1.52.357861.357937	scaffold51_52_with_IES	357861	357937	77	internal	Nested	IESPGM.PTET51.1.52.340682	105	28
JuxtIES.PTET51.1.53.385832.385958	scaffold51_53_with_IES	385832	385958	127	left_internal	Juxtaposed	IESPGM.PTET51.1.53.368446	266	139
NestIES.PTET51.1.54.127587.127706	scaffold51_54_with_IES	127587	127706	120	internal	Nested	IESPGM.PTET51.1.54.122415	192	72
JuxtIES.PTET51.1.55.113977.114006	scaffold51_55_with_IES	113977	114006	30	left_internal	Juxtaposed	IESPGM.PTET51.1.55.109945	279	249
NestIES.PTET51.1.556.61477.61521	scaffold51_556_with_IES	61477	61521	45	internal	Nested	IESPGM.PTET51.1.556.58529	74	29
NestIES.PTET51.1.56.262684.262810	scaffold51_56_with_IES	262684	262810	127	internal	Nested	IESPGM.PTET51.1.56.249699	157	30
NestIES.PTET51.1.57.54309.54367	scaffold51_57_with_IES	54309	54367	59	internal	Nested	IESPGM.PTET51.1.57.50935	1276	1217
JuxtIES.PTET51.1.58.143879.143904	scaffold51_58_with_IES	143879	143904	26	left_internal	Juxtaposed	IESPGM.PTET51.1.58.137888	73	47
NestIES.PTET51.1.58.169427.169508	scaffold51_58_with_IES	169427	169508	82	internal	Nested	IESPGM.PTET51.1.58.161884	110	28
NestIES.PTET51.1.59.298330.298356	scaffold51_59_with_IES	298330	298356	27	internal	Nested	IESPGM.PTET51.1.59.282828	249	222
JuxtIES.PTET51.1.60.149225.149289	scaffold51_60_with_IES	149225	149289	65	left_internal	Juxtaposed	IESPGM.PTET51.1.60.141693	94	29
JuxtIES.PTET51.1.60.280172.280443	scaffold51_60_with_IES	280172	280443	272	left_internal	Juxtaposed	IESPGM.PTET51.1.60.264490	298	26
JuxtIES.PTET51.1.61.197029.197076	scaffold51_61_with_IES	197029	197076	48	right_internal	Juxtaposed	IESPGM.PTET51.1.61.186529	92	44
JuxtIES.PTET51.1.61.257528.257555	scaffold51_61_with_IES	257528	257555	28	right_internal	Juxtaposed	IESPGM.PTET51.1.61.242950	54	26
NestIES.PTET51.1.63.413455.413560	scaffold51_63_with_IES	413455	413560	106	internal	Nested	IESPGM.PTET51.1.63.394849	181	75
NestIES.PTET51.1.64.202496.202585	scaffold51_64_with_IES	202496	202585	90	internal	Nested	IESPGM.PTET51.1.64.197131	119	29
NestIES.PTET51.1.64.95684.95709	scaffold51_64_with_IES	95684	95709	26	internal	Nested	IESPGM.PTET51.1.64.94053	225	199
NestIES.PTET51.1.65.259038.259145	scaffold51_65_with_IES	259038	259145	108	internal	Nested	IESPGM.PTET51.1.65.244527	175	67
JuxtIES.PTET51.1.68.267403.267622	scaffold51_68_with_IES	267403	267622	220	left_internal	Juxtaposed	IESPGM.PTET51.1.68.254969	290	70
JuxtIES.PTET51.1.7.267355.267382	scaffold51_7_with_IES	267355	267382	28	left_internal	Juxtaposed	IESPGM.PTET51.1.7.262395	127	99
NestIES.PTET51.1.7.607562.607592	scaffold51_7_with_IES	607562	607592	31	internal	Nested	IESPGM.PTET51.1.7.588373	59	28
JuxtIES.PTET51.1.71.93504.93531	scaffold51_71_with_IES	93504	93531	28	right_internal	Juxtaposed	IESPGM.PTET51.1.71.89380	73	45
NestIES.PTET51.1.73.325837.325862	scaffold51_73_with_IES	325837	325862	26	internal	Nested	IESPGM.PTET51.1.73.313635	205	179
NestIES.PTET51.1.74.285546.285617	scaffold51_74_with_IES	285546	285617	72	internal	Nested	IESPGM.PTET51.1.74.277248	120	48
JuxtIES.PTET51.1.74.379114.379140	scaffold51_74_with_IES	379114	379140	27	left_internal	Juxtaposed	IESPGM.PTET51.1.74.362494	83	56
JuxtIES.PTET51.1.79.281840.281865	scaffold51_79_with_IES	281840	281865	26	left_internal	Juxtaposed	IESPGM.PTET51.1.79.272630	96	70
NestIES.PTET51.1.8.192896.192921	scaffold51_8_with_IES	192896	192921	26	internal	Nested	IESPGM.PTET51.1.8.183522	88	62
NestIES.PTET51.1.8.233399.233475	scaffold51_8_with_IES	233399	233475	77	internal	Nested	IESPGM.PTET51.1.8.222450	133	56
JuxtIES.PTET51.1.80.118709.118737	scaffold51_80_with_IES	118709	118737	29	right_internal	Juxtaposed	IESPGM.PTET51.1.80.111116	149	120
NestIES.PTET51.1.80.296172.296264	scaffold51_80_with_IES	296172	296264	93	internal	Nested	IESPGM.PTET51.1.80.280224	125	32
NestIES.PTET51.1.80.338581.338606	scaffold51_80_with_IES	338581	338606	26	internal	Nested	IESPGM.PTET51.1.80.321296	156	130
JuxtIES.PTET51.1.88.18250.18277	scaffold51_88_with_IES	18250	18277	28	right_internal	Juxtaposed	IESPGM.PTET51.1.88.17352	54	26
JuxtIES.PTET51.1.89.255014.255126	scaffold51_89_with_IES	255014	255126	113	right_internal	Juxtaposed	IESPGM.PTET51.1.89.239553	142	29
NestIES.PTET51.1.9.369169.369198	scaffold51_9_with_IES	369169	369198	30	internal	Nested	IESPGM.PTET51.1.9.351963	99	69
JuxtIES.PTET51.1.9.464144.464202	scaffold51_9_with_IES	464144	464202	59	right_internal	Juxtaposed	IESPGM.PTET51.1.9.440212	88	29
NestIES.PTET51.1.90.319247.319342	scaffold51_90_with_IES	319247	319342	96	internal	Nested	IESPGM.PTET51.1.90.306519	159	63
NestIES.PTET51.1.91.142246.142360	scaffold51_91_with_IES	142246	142360	115	internal	Nested	IESPGM.PTET51.1.91.138558	220	105
JuxtIES.PTET51.1.92.247012.247037	scaffold51_92_with_IES	247012	247037	26	left_internal	Juxtaposed	IESPGM.PTET51.1.92.238414	52	26
NestIES.PTET51.1.92.310324.310369	scaffold51_92_with_IES	310324	310369	46	internal	Nested	IESPGM.PTET51.1.92.299058	74	28
JuxtIES.PTET51.1.92.334500.334525	scaffold51_92_with_IES	334500	334525	26	left_internal	Juxtaposed	IESPGM.PTET51.1.92.321962	52	26
JuxtIES.PTET51.1.94.190577.190603	scaffold51_94_with_IES	190577	190603	27	left_internal	Juxtaposed	IESPGM.PTET51.1.94.182688	143	116
NestIES.PTET51.1.96.175601.175627	scaffold51_96_with_IES	175601	175627	27	internal	Nested	IESPGM.PTET51.1.96.167792	292	265
JuxtIES.PTET51.1.96.42457.42576	scaffold51_96_with_IES	42457	42576	120	right_internal	Juxtaposed	IESPGM.PTET51.1.96.40778	216	96
NestIES.PTET51.1.1.201693.201721	scaffold51_1_with_IES	201693	201721	29	internal	Nested	IESPGM.PTET51.1.1.191133	57	28
JuxtIES.PTET51.1.10.202976.203079	scaffold51_10_with_IES	202976	203079	104	left_internal	Juxtaposed	IESPGM.PTET51.1.10.191702	181	77
JuxtIES.PTET51.1.103.69208.69503	scaffold51_103_with_IES	69208	69503	296	left_internal	Juxtaposed	IESPGM.PTET51.1.103.67051	340	44
NestIES.PTET51.1.104.228053.228096	scaffold51_104_with_IES	228053	228096	44	internal	Nested	IESPGM.PTET51.1.104.214460	639	595
NestIES.PTET51.1.105.256170.258462	scaffold51_105_with_IES	256170	258462	2293	internal	Nested	IESPGM.PTET51.1.105.239361	2483	190
NestIES.PTET51.1.112.20651.20742	scaffold51_112_with_IES	20651	20742	92	internal	Nested	IESPGM.PTET51.1.112.19825	121	29
NestIES.PTET51.1.112.61574.61773	scaffold51_112_with_IES	61574	61773	200	internal	Nested	IESPGM.PTET51.1.112.58769	318	118
NestIES.PTET51.1.121.272977.273084	scaffold51_121_with_IES	272977	273084	108	internal	Nested	IESPGM.PTET51.1.121.259594	155	47
NestIES.PTET51.1.122.138967.139032	scaffold51_122_with_IES	138967	139032	66	internal	Nested	IESPGM.PTET51.1.122.133239	122	56
JuxtIES.PTET51.1.123.255038.255302	scaffold51_123_with_IES	255038	255302	265	right_internal	Juxtaposed	IESPGM.PTET51.1.123.241459	293	28
JuxtIES.PTET51.1.13.525421.525693	scaffold51_13_with_IES	525421	525693	273	right_internal	Juxtaposed	IESPGM.PTET51.1.13.507425	345	72
NestIES.PTET51.1.130.115506.115620	scaffold51_130_with_IES	115506	115620	115	internal	Nested	IESPGM.PTET51.1.130.109192	144	29
NestIES.PTET51.1.132.107698.107727	scaffold51_132_with_IES	107698	107727	30	internal	Nested	IESPGM.PTET51.1.132.98534	58	28
NestIES.PTET51.1.139.136654.136681	scaffold51_139_with_IES	136654	136681	28	internal	Nested	IESPGM.PTET51.1.139.131003	139	111
JuxtIES.PTET51.1.14.424911.424937	scaffold51_14_with_IES	424911	424937	27	right_internal	Juxtaposed	IESPGM.PTET51.1.14.401341	167	140
JuxtIES.PTET51.1.14.447156.447383	scaffold51_14_with_IES	447156	447383	228	right_internal	Juxtaposed	IESPGM.PTET51.1.14.422714	354	126
NestIES.PTET51.1.145.185698.186147	scaffold51_145_with_IES	185698	186147	450	internal	Nested	IESPGM.PTET51.1.145.177592	518	68
NestIES.PTET51.1.146.170015.170149	scaffold51_146_with_IES	170015	170149	135	internal	Nested	IESPGM.PTET51.1.146.161725	212	77
NestIES.PTET51.1.147.189093.189161	scaffold51_147_with_IES	189093	189161	69	internal	Nested	IESPGM.PTET51.1.147.182542	115	46
NestIES.PTET51.1.147.82533.82618	scaffold51_147_with_IES	82533	82618	86	internal	Nested	IESPGM.PTET51.1.147.79968	143	57
JuxtIES.PTET51.1.148.201945.201988	scaffold51_148_with_IES	201945	201988	44	left_internal	Juxtaposed	IESPGM.PTET51.1.148.191352	75	31
NestIES.PTET51.1.155.26007.26050	scaffold51_155_with_IES	26007	26050	44	internal	Nested	IESPGM.PTET51.1.155.25359	70	26
JuxtIES.PTET51.1.156.104535.104639	scaffold51_156_with_IES	104535	104639	105	left_internal	Juxtaposed	IESPGM.PTET51.1.156.99354	131	26
NestIES.PTET51.1.157.97352.97375	scaffold51_157_with_IES	97352	97375	24	internal	Nested	IESPGM.PTET51.1.157.92191	70	46
NestIES.PTET51.1.158.120303.120412	scaffold51_158_with_IES	120303	120412	110	internal	Nested	IESPGM.PTET51.1.158.114219	137	27
NestIES.PTET51.1.161.37428.37484	scaffold51_161_with_IES	37428	37484	57	internal	Nested	IESPGM.PTET51.1.161.36417	144	87
NestIES.PTET51.1.161.62451.62497	scaffold51_161_with_IES	62451	62497	47	internal	Nested	IESPGM.PTET51.1.161.60509	77	30
JuxtIES.PTET51.1.172.66685.66783	scaffold51_172_with_IES	66685	66783	99	left_internal	Juxtaposed	IESPGM.PTET51.1.172.63253	212	113
JuxtIES.PTET51.1.179.87366.87391	scaffold51_179_with_IES	87366	87391	26	right_internal	Juxtaposed	IESPGM.PTET51.1.179.81453	119	93
NestIES.PTET51.1.18.340100.340162	scaffold51_18_with_IES	340100	340162	63	internal	Nested	IESPGM.PTET51.1.18.317827	112	49
NestIES.PTET51.1.18.45877.46038	scaffold51_18_with_IES	45877	46038	162	internal	Nested	IESPGM.PTET51.1.18.44245	245	83
NestIES.PTET51.1.23.552304.552614	scaffold51_23_with_IES	552304	552614	311	internal	Nested	IESPGM.PTET51.1.23.529602	339	28
NestIES.PTET51.1.24.530953.531052	scaffold51_24_with_IES	530953	531052	100	internal	Nested	IESPGM.PTET51.1.24.500865	128	28
JuxtIES.PTET51.1.28.300600.300643	scaffold51_28_with_IES	300600	300643	44	left_internal	Juxtaposed	IESPGM.PTET51.1.28.288505	121	77
JuxtIES.PTET51.1.28.412573.412620	scaffold51_28_with_IES	412573	412620	48	right_internal	Juxtaposed	IESPGM.PTET51.1.28.394213	92	44
NestIES.PTET51.1.30.2730.6388	scaffold51_30_with_IES	2730	6388	3659	internal	Nested	IESPGM.PTET51.1.30.2401	3761	102
NestIES.PTET51.1.31.547847.548014	scaffold51_31_with_IES	547847	548014	168	internal	Nested	IESPGM.PTET51.1.31.526379	194	26
JuxtIES.PTET51.1.37.468720.468745	scaffold51_37_with_IES	468720	468745	26	right_internal	Juxtaposed	IESPGM.PTET51.1.37.445666	55	29
NestIES.PTET51.1.39.279578.279679	scaffold51_39_with_IES	279578	279679	102	internal	Nested	IESPGM.PTET51.1.39.260431	193	91
NestIES.PTET51.1.4.457090.457223	scaffold51_4_with_IES	457090	457223	134	internal	Nested	IESPGM.PTET51.1.4.441236	179	45
NestIES.PTET51.1.40.392778.392822	scaffold51_40_with_IES	392778	392822	45	internal	Nested	IESPGM.PTET51.1.40.367302	75	30
NestIES.PTET51.1.41.500795.500820	scaffold51_41_with_IES	500795	500820	26	internal	Nested	IESPGM.PTET51.1.41.478801	2171	2145
NestIES.PTET51.1.43.463574.463628	scaffold51_43_with_IES	463574	463628	55	internal	Nested	IESPGM.PTET51.1.43.446440	174	119
JuxtIES.PTET51.1.44.396049.396115	scaffold51_44_with_IES	396049	396115	67	left_internal	Juxtaposed	IESPGM.PTET51.1.44.381212	95	28
JuxtIES.PTET51.1.45.287072.287312	scaffold51_45_with_IES	287072	287312	241	right_internal	Juxtaposed	IESPGM.PTET51.1.45.269545	271	30
NestIES.PTET51.1.45.32355.32424	scaffold51_45_with_IES	32355	32424	70	internal	Nested	IESPGM.PTET51.1.45.28084	117	47
NestIES.PTET51.1.46.373875.374170	scaffold51_46_with_IES	373875	374170	296	internal	Nested	IESPGM.PTET51.1.46.353991	335	39
JuxtIES.PTET51.1.47.137155.137282	scaffold51_47_with_IES	137155	137282	128	right_internal	Juxtaposed	IESPGM.PTET51.1.47.131617	157	29
NestIES.PTET51.1.47.99085.99143	scaffold51_47_with_IES	99085	99143	59	internal	Nested	IESPGM.PTET51.1.47.95655	106	47
NestIES.PTET51.1.55.156323.156399	scaffold51_55_with_IES	156323	156399	77	internal	Nested	IESPGM.PTET51.1.55.149625	121	44
NestIES.PTET51.1.58.306993.307366	scaffold51_58_with_IES	306993	307366	374	internal	Nested	IESPGM.PTET51.1.58.290252	441	67
JuxtIES.PTET51.1.59.240795.240891	scaffold51_59_with_IES	240795	240891	97	right_internal	Juxtaposed	IESPGM.PTET51.1.59.227441	140	43
JuxtIES.PTET51.1.59.372635.372749	scaffold51_59_with_IES	372635	372749	115	left_internal	Juxtaposed	IESPGM.PTET51.1.59.355217	142	27
NestIES.PTET51.1.6.26478.26506	scaffold51_6_with_IES	26478	26506	29	internal	Nested	IESPGM.PTET51.1.6.24971	104	75
JuxtIES.PTET51.1.60.159456.159775	scaffold51_60_with_IES	159456	159775	320	left_internal	Juxtaposed	IESPGM.PTET51.1.60.151621	376	56
JuxtIES.PTET51.1.61.142297.142344	scaffold51_61_with_IES	142297	142344	48	left_internal	Juxtaposed	IESPGM.PTET51.1.61.134638	78	30
NestIES.PTET51.1.61.414449.414514	scaffold51_61_with_IES	414449	414514	66	internal	Nested	IESPGM.PTET51.1.61.394398	94	28
NestIES.PTET51.1.65.12206.12522	scaffold51_65_with_IES	12206	12522	317	internal	Nested	IESPGM.PTET51.1.65.12003	366	49
NestIES.PTET51.1.65.216296.216350	scaffold51_65_with_IES	216296	216350	55	internal	Nested	IESPGM.PTET51.1.65.203617	82	27
JuxtIES.PTET51.1.66.141747.141853	scaffold51_66_with_IES	141747	141853	107	left_internal	Juxtaposed	IESPGM.PTET51.1.66.137978	155	48
JuxtIES.PTET51.1.67.64816.64894	scaffold51_67_with_IES	64816	64894	79	right_internal	Juxtaposed	IESPGM.PTET51.1.67.61111	108	29
NestIES.PTET51.1.7.270787.270869	scaffold51_7_with_IES	270787	270869	83	internal	Nested	IESPGM.PTET51.1.7.265511	210	127
JuxtIES.PTET51.1.8.300474.300770	scaffold51_8_with_IES	300474	300770	297	left_internal	Juxtaposed	IESPGM.PTET51.1.8.286341	324	27
JuxtIES.PTET51.1.85.209443.209541	scaffold51_85_with_IES	209443	209541	99	right_internal	Juxtaposed	IESPGM.PTET51.1.85.197122	236	137
NestIES.PTET51.1.9.189924.190876	scaffold51_9_with_IES	189924	190876	953	internal	Nested	IESPGM.PTET51.1.9.183994	1019	66
NestIES.PTET51.1.9.189928.190880	scaffold51_9_with_IES	189928	190880	953	internal	Nested	IESPGM.PTET51.1.9.183994	1019	66
JuxtIES.PTET51.1.90.283535.283643	scaffold51_90_with_IES	283535	283643	109	right_internal	Juxtaposed	IESPGM.PTET51.1.90.272211	156	47
JuxtIES.PTET51.1.92.198947.199063	scaffold51_92_with_IES	198947	199063	117	left_internal	Juxtaposed	IESPGM.PTET51.1.92.192771	174	57
NestIES.PTET51.1.97.194658.194811	scaffold51_97_with_IES	194658	194811	154	internal	Nested	IESPGM.PTET51.1.97.184921	244	90
JuxtIES.PTET51.1.102.297929.297960	scaffold51_102_with_IES	297929	297960	32	right_internal	Juxtaposed	IESPGM.PTET51.1.102.282705	302	270
JuxtIES.PTET51.1.125.162121.162281	scaffold51_125_with_IES	162121	162281	161	left_internal	Juxtaposed	IESPGM.PTET51.1.125.155011	189	28
JuxtIES.PTET51.1.20.155722.155900	scaffold51_20_with_IES	155722	155900	179	right_internal	Juxtaposed	IESPGM.PTET51.1.20.146377	205	26
JuxtIES.PTET51.1.24.568422.568475	scaffold51_24_with_IES	568422	568475	54	left_internal	Juxtaposed	IESPGM.PTET51.1.24.537044	270	216
JuxtIES.PTET51.1.32.255774.255860	scaffold51_32_with_IES	255774	255860	87	left_internal	Juxtaposed	IESPGM.PTET51.1.32.243628	134	47
JuxtIES.PTET51.1.4.730321.730346	scaffold51_4_with_IES	730321	730346	26	left_internal	Juxtaposed	IESPGM.PTET51.1.4.698453	81	55
NestIES.PTET51.1.41.110130.110345	scaffold51_41_with_IES	110130	110345	216	internal	Nested	IESPGM.PTET51.1.41.107470	322	106
JuxtIES.PTET51.1.42.201296.201364	scaffold51_42_with_IES	201296	201364	69	left_internal	Juxtaposed	IESPGM.PTET51.1.42.190117	154	85
NestIES.PTET51.1.48.314222.314439	scaffold51_48_with_IES	314222	314439	218	internal	Nested	IESPGM.PTET51.1.48.296769	315	97
JuxtIES.PTET51.1.65.212225.212295	scaffold51_65_with_IES	212225	212295	71	left_internal	Juxtaposed	IESPGM.PTET51.1.65.199748	100	29
NestIES.PTET51.1.71.8427.8511	scaffold51_71_with_IES	8427	8511	85	internal	Nested	IESPGM.PTET51.1.71.7925	129	44
NestIES.PTET51.1.76.58731.59179	scaffold51_76_with_IES	58731	59179	449	internal	Nested	IESPGM.PTET51.1.76.54340	533	84
NestIES.PTET51.1.77.17048.17354	scaffold51_77_with_IES	17048	17354	307	internal	Nested	IESPGM.PTET51.1.77.16494	483	176
NestIES.PTET51.1.86.121570.121658	scaffold51_86_with_IES	121570	121658	89	internal	Nested	IESPGM.PTET51.1.86.114714	138	49
NestIES.PTET51.1.89.182483.182612	scaffold51_89_with_IES	182483	182612	130	internal	Nested	IESPGM.PTET51.1.89.170573	180	50
NestIES.PTET51.1.91.268726.268928	scaffold51_91_with_IES	268726	268928	203	internal	Nested	IESPGM.PTET51.1.91.260252	291	88
JuxtIES.PTET51.1.171.158320.158620	scaffold51_171_with_IES	158320	158620	301	left_internal	Juxtaposed	IESPGM.PTET51.1.171.149233	347	46
NestIES.PTET51.1.52.255621.255857	scaffold51_52_with_IES	255621	255857	237	internal	Nested	IESPGM.PTET51.1.52.244817	304	67
NestIES.PTET51.1.57.181276.181302	scaffold51_57_with_IES	181276	181302	27	internal	Nested	IESPGM.PTET51.1.57.170740	1496	1469
NestIES.PTET51.1.8.233387.233491	scaffold51_8_with_IES	233387	233491	105	internal	Nested	IESPGM.PTET51.1.8.222450	133	28
