# Supplementary material for: Developmental timing of programmed DNA elimination in Paramecium tetraurelia recapitulates germline transposon evolutionary dynamics
Source: HighWire-hosted journal article supplement (doi:10.1101/gr.277027.122), 2022-11-01
Supplement: Supplemental_Table_S5.xlsx [file Supplemental_Table_S5.xlsx]

## Sheet: Supp Table S5
Supplemental Table S5. List of buried IESs in MIC-specific regions.
NAME	SEQ_ID	START	END	LENGTH
LierIES.PTET51.1.861988.115301.115328	NODE_10071_length_122466_cov_43.861988	115301	115328	28
LierIES.PTET51.1.502926.7730.7795	NODE_1007_length_13155_cov_47.502926	7730	7795	66
LierIES.PTET51.1.217880.17994.18037	NODE_10243_length_30728_cov_21.217880	17994	18037	44
LierIES.PTET51.1.217880.18446.18472	NODE_10243_length_30728_cov_21.217880	18446	18472	27
LierIES.PTET51.1.154917.3996.4024	NODE_10272_length_11135_cov_19.154917	3996	4024	29
LierIES.PTET51.1.870134.5181.5207	NODE_10556_length_9764_cov_21.870134	5181	5207	27
LierIES.PTET51.1.881657.2234.2260	NODE_10730_length_38228_cov_20.881657	2234	2260	27
LierIES.PTET51.1.964003.11243.11271	NODE_10754_length_13029_cov_27.964003	11243	11271	29
LierIES.PTET51.1.632994.1212.1237	NODE_10862_length_1376_cov_16.632994	1212	1237	26
LierIES.PTET51.1.129213.552.578	NODE_12556_length_1958_cov_21.129213	552	578	27
LierIES.PTET51.1.056721.22136.22161	NODE_1283_length_23078_cov_23.056721	22136	22161	26
LierIES.PTET51.1.464306.14215.14245	NODE_1340_length_82997_cov_41.464306	14215	14245	31
LierIES.PTET51.1.599266.148795.148838	NODE_13516_length_209992_cov_44.599266	148795	148838	44
LierIES.PTET51.1.448496.342.367	NODE_14167_length_18018_cov_22.448496	342	367	26
LierIES.PTET51.1.448496.3462.3488	NODE_14167_length_18018_cov_22.448496	3462	3488	27
LierIES.PTET51.1.623552.6535.6562	NODE_14234_length_23496_cov_20.623552	6535	6562	28
LierIES.PTET51.1.714413.27776.27846	NODE_15168_length_46301_cov_21.714413	27776	27846	71
LierIES.PTET51.1.132084.105614.105640	NODE_15514_length_109636_cov_46.132084	105614	105640	27
LierIES.PTET51.1.688560.3798.3827	NODE_15705_length_15316_cov_26.688560	3798	3827	30
LierIES.PTET51.1.104727.1679.1734	NODE_16128_length_2750_cov_25.104727	1679	1734	56
LierIES.PTET51.1.578106.11630.11655	NODE_1783_length_37955_cov_21.578106	11630	11655	26
LierIES.PTET51.1.578106.26744.26769	NODE_1783_length_37955_cov_21.578106	26744	26769	26
LierIES.PTET51.1.641125.6815.6842	NODE_17963_length_18310_cov_22.641125	6815	6842	28
LierIES.PTET51.1.626751.4127.4152	NODE_18472_length_7992_cov_17.626751	4127	4152	26
LierIES.PTET51.1.976871.11695.11724	NODE_18643_length_35237_cov_21.976871	11695	11724	30
LierIES.PTET51.1.175194.10047.10077	NODE_20951_length_24236_cov_43.175194	10047	10077	31
LierIES.PTET51.1.196911.19659.19703	NODE_21369_length_22401_cov_20.196911	19659	19703	45
LierIES.PTET51.1.173784.12247.12276	NODE_2159_length_13793_cov_22.173784	12247	12276	30
LierIES.PTET51.1.670645.7489.7515	NODE_21817_length_33259_cov_20.670645	7489	7515	27
LierIES.PTET51.1.670645.11103.11164	NODE_21817_length_33259_cov_20.670645	11103	11164	62
LierIES.PTET51.1.711769.48086.48115	NODE_2389_length_54231_cov_20.711769	48086	48115	30
LierIES.PTET51.1.814339.74065.74113	NODE_24062_length_80884_cov_42.814339	74065	74113	49
LierIES.PTET51.1.963585.5555.5580	NODE_24833_length_7195_cov_21.963585	5555	5580	26
LierIES.PTET51.1.329559.528.553	NODE_25131_length_7419_cov_21.329559	528	553	26
LierIES.PTET51.1.184465.13748.13774	NODE_2525_length_21294_cov_22.184465	13748	13774	27
LierIES.PTET51.1.146135.9715.9742	NODE_25811_length_36569_cov_22.146135	9715	9742	28
LierIES.PTET51.1.389399.277.303	NODE_27083_length_21903_cov_21.389399	277	303	27
LierIES.PTET51.1.389399.3425.3453	NODE_27083_length_21903_cov_21.389399	3425	3453	29
LierIES.PTET51.1.875563.12079.12123	NODE_27819_length_21794_cov_19.875563	12079	12123	45
LierIES.PTET51.1.397425.2716.2744	NODE_28792_length_26020_cov_21.397425	2716	2744	29
LierIES.PTET51.1.057108.6003.6029	NODE_29292_length_21153_cov_21.057108	6003	6029	27
LierIES.PTET51.1.880459.93426.93573	NODE_31323_length_97689_cov_44.880459	93426	93573	148
LierIES.PTET51.1.756298.23077.23102	NODE_31499_length_24415_cov_21.756298	23077	23102	26
LierIES.PTET51.1.400677.20427.20453	NODE_31810_length_33114_cov_20.400677	20427	20453	27
LierIES.PTET51.1.896051.6312.6339	NODE_3321_length_28216_cov_19.896051	6312	6339	28
LierIES.PTET51.1.905672.8301.8329	NODE_33921_length_33882_cov_19.905672	8301	8329	29
LierIES.PTET51.1.482735.970.996	NODE_34290_length_4692_cov_36.482735	970	996	27
LierIES.PTET51.1.750977.1703.1729	NODE_35298_length_3325_cov_22.750977	1703	1729	27
LierIES.PTET51.1.252926.53323.53350	NODE_36025_length_67225_cov_20.252926	53323	53350	28
LierIES.PTET51.1.168800.3308.3333	NODE_36095_length_21096_cov_19.168800	3308	3333	26
LierIES.PTET51.1.168800.16319.16345	NODE_36095_length_21096_cov_19.168800	16319	16345	27
LierIES.PTET51.1.468813.421.709	NODE_36669_length_2453_cov_26.468813	421	709	289
LierIES.PTET51.1.223619.14277.14302	NODE_38491_length_48368_cov_31.223619	14277	14302	26
LierIES.PTET51.1.477293.1683.1711	NODE_41819_length_20566_cov_22.477293	1683	1711	29
LierIES.PTET51.1.011850.25187.25231	NODE_4309_length_68855_cov_21.011850	25187	25231	45
LierIES.PTET51.1.842581.7558.7605	NODE_4796_length_8741_cov_21.842581	7558	7605	48
LierIES.PTET51.1.768215.42134.42160	NODE_5007_length_52950_cov_21.768215	42134	42160	27
LierIES.PTET51.1.486732.37629.37655	NODE_5125_length_79785_cov_20.486732	37629	37655	27
LierIES.PTET51.1.486732.62883.62926	NODE_5125_length_79785_cov_20.486732	62883	62926	44
LierIES.PTET51.1.577396.486.514	NODE_51988_length_2035_cov_30.577396	486	514	29
LierIES.PTET51.1.773106.96856.96881	NODE_5326_length_106935_cov_20.773106	96856	96881	26
LierIES.PTET51.1.118946.1614.1639	NODE_5550_length_16394_cov_22.118946	1614	1639	26
LierIES.PTET51.1.826283.1529.1554	NODE_56874_length_2222_cov_23.826283	1529	1554	26
LierIES.PTET51.1.996761.62167.62192	NODE_57585_length_74115_cov_21.996761	62167	62192	26
LierIES.PTET51.1.739565.34052.34080	NODE_58312_length_37134_cov_21.739565	34052	34080	29
LierIES.PTET51.1.452837.24985.25010	NODE_5849_length_34158_cov_20.452837	24985	25010	26
LierIES.PTET51.1.747532.769.794	NODE_5856_length_1620_cov_33.747532	769	794	26
LierIES.PTET51.1.596272.51577.51673	NODE_6032_length_78439_cov_45.596272	51577	51673	97
LierIES.PTET51.1.455614.10681.10708	NODE_6118_length_22609_cov_22.455614	10681	10708	28
LierIES.PTET51.1.666084.27957.27984	NODE_6170_length_30867_cov_19.666084	27957	27984	28
LierIES.PTET51.1.534714.13767.13795	NODE_6380_length_49520_cov_21.534714	13767	13795	29
LierIES.PTET51.1.534714.16994.17093	NODE_6380_length_49520_cov_21.534714	16994	17093	100
LierIES.PTET51.1.970057.11197.11280	NODE_6707_length_27885_cov_20.970057	11197	11280	84
LierIES.PTET51.1.871107.12608.12634	NODE_6774_length_26945_cov_21.871107	12608	12634	27
LierIES.PTET51.1.407721.15776.15805	NODE_6848_length_21267_cov_19.407721	15776	15805	30
LierIES.PTET51.1.805151.17358.17384	NODE_6920_length_56690_cov_19.805151	17358	17384	27
LierIES.PTET51.1.805151.29727.29754	NODE_6920_length_56690_cov_19.805151	29727	29754	28
LierIES.PTET51.1.234203.114.140	NODE_6925_length_14291_cov_31.234203	114	140	27
LierIES.PTET51.1.982180.22316.22341	NODE_7045_length_27888_cov_20.982180	22316	22341	26
LierIES.PTET51.1.953281.2400.2425	NODE_7456_length_25086_cov_28.953281	2400	2425	26
LierIES.PTET51.1.828640.19843.19870	NODE_7469_length_23582_cov_19.828640	19843	19870	28
LierIES.PTET51.1.932121.6188.6213	NODE_750_length_50929_cov_21.932121	6188	6213	26
LierIES.PTET51.1.932121.48421.48449	NODE_750_length_50929_cov_21.932121	48421	48449	29
LierIES.PTET51.1.643639.20270.20296	NODE_7545_length_24391_cov_21.643639	20270	20296	27
LierIES.PTET51.1.964689.10340.10366	NODE_8260_length_22203_cov_20.964689	10340	10366	27
LierIES.PTET51.1.620121.3087.3124	NODE_8341_length_35127_cov_21.620121	3087	3124	38
LierIES.PTET51.1.620121.3687.3756	NODE_8341_length_35127_cov_21.620121	3687	3756	70
LierIES.PTET51.1.239822.464.490	NODE_8396_length_3169_cov_23.239822	464	490	27
LierIES.PTET51.1.082268.27845.27872	NODE_841_length_37901_cov_20.082268	27845	27872	28
LierIES.PTET51.1.922266.3946.3972	NODE_862_length_5506_cov_20.922266	3946	3972	27
LierIES.PTET51.1.081625.10576.10690	NODE_9050_length_16588_cov_20.081625	10576	10690	115
LierIES.PTET51.1.793141.1569.1594	NODE_9144_length_1837_cov_15.793141	1569	1594	26
LierIES.PTET51.1.073181.22119.22147	NODE_9385_length_28573_cov_22.073181	22119	22147	29
LierIES.PTET51.1.981144.1118.1143	NODE_9447_length_1591_cov_36.981144	1118	1143	26
LierIES.PTET51.1.379120.21451.21477	NODE_9464_length_26216_cov_22.379120	21451	21477	27
LierIES.PTET51.1.379120.24506.24534	NODE_9464_length_26216_cov_22.379120	24506	24534	29
LierIES.PTET51.1.921694.5810.5837	NODE_9926_length_7394_cov_20.921694	5810	5837	28
LierIES.PTET51.1.154917.4460.4488	NODE_10272_length_11135_cov_19.154917	4460	4488	29
LierIES.PTET51.1.324398.4042.4069	NODE_10329_length_9140_cov_18.324398	4042	4069	28
LierIES.PTET51.1.502174.8573.8601	NODE_1311_length_13796_cov_20.502174	8573	8601	29
LierIES.PTET51.1.961933.8850.8903	NODE_13302_length_16287_cov_24.961933	8850	8903	54
LierIES.PTET51.1.448496.3574.3600	NODE_14167_length_18018_cov_22.448496	3574	3600	27
LierIES.PTET51.1.141430.3720.3811	NODE_15424_length_5402_cov_18.141430	3720	3811	92
LierIES.PTET51.1.119402.22434.22460	NODE_16111_length_37085_cov_21.119402	22434	22460	27
LierIES.PTET51.1.179708.29067.29092	NODE_16992_length_31401_cov_21.179708	29067	29092	26
LierIES.PTET51.1.146742.763.791	NODE_17021_length_2501_cov_19.146742	763	791	29
LierIES.PTET51.1.581789.36620.36697	NODE_1718_length_70988_cov_22.581789	36620	36697	78
LierIES.PTET51.1.390940.699.768	NODE_17643_length_8211_cov_19.390940	699	768	70
LierIES.PTET51.1.682377.17325.17382	NODE_2272_length_45107_cov_17.682377	17325	17382	58
LierIES.PTET51.1.682377.40496.40585	NODE_2272_length_45107_cov_17.682377	40496	40585	90
LierIES.PTET51.1.577244.427.492	NODE_23692_length_1916_cov_36.577244	427	492	66
LierIES.PTET51.1.605862.5956.6014	NODE_24768_length_20026_cov_21.605862	5956	6014	59
LierIES.PTET51.1.556765.12795.12958	NODE_2676_length_15256_cov_24.556765	12795	12958	164
LierIES.PTET51.1.588322.23972.23999	NODE_27250_length_29217_cov_34.588322	23972	23999	28
LierIES.PTET51.1.508701.7782.7855	NODE_28134_length_10631_cov_21.508701	7782	7855	74
LierIES.PTET51.1.915102.3349.3376	NODE_28164_length_21567_cov_22.915102	3349	3376	28
LierIES.PTET51.1.215481.2221.2248	NODE_28206_length_2390_cov_36.215481	2221	2248	28
LierIES.PTET51.1.664551.169.195	NODE_34080_length_9933_cov_39.664551	169	195	27
LierIES.PTET51.1.749132.9454.9499	NODE_3491_length_13828_cov_21.749132	9454	9499	46
LierIES.PTET51.1.065557.26836.26900	NODE_3504_length_32933_cov_23.065557	26836	26900	65
LierIES.PTET51.1.442760.2521.2546	NODE_35068_length_3232_cov_32.442760	2521	2546	26
LierIES.PTET51.1.842373.9605.9633	NODE_35262_length_24412_cov_19.842373	9605	9633	29
LierIES.PTET51.1.842373.13748.13867	NODE_35262_length_24412_cov_19.842373	13748	13867	120
LierIES.PTET51.1.813198.1672.1700	NODE_3938_length_18276_cov_19.813198	1672	1700	29
LierIES.PTET51.1.390072.3161.3236	NODE_41666_length_4130_cov_47.390072	3161	3236	76
LierIES.PTET51.1.032825.550.614	NODE_41_length_4478_cov_47.032825	550	614	65
LierIES.PTET51.1.570143.3081.3145	NODE_43156_length_27537_cov_20.570143	3081	3145	65
LierIES.PTET51.1.570143.11599.11675	NODE_43156_length_27537_cov_20.570143	11599	11675	77
LierIES.PTET51.1.237606.1834.1887	NODE_55158_length_4962_cov_24.237606	1834	1887	54
LierIES.PTET51.1.468672.37587.37614	NODE_5569_length_39070_cov_19.468672	37587	37614	28
LierIES.PTET51.1.559992.2751.2778	NODE_5700_length_10143_cov_21.559992	2751	2778	28
LierIES.PTET51.1.452837.6352.6378	NODE_5849_length_34158_cov_20.452837	6352	6378	27
LierIES.PTET51.1.212353.2289.2316	NODE_64329_length_10134_cov_43.212353	2289	2316	28
LierIES.PTET51.1.522993.4300.4497	NODE_6630_length_4958_cov_19.522993	4300	4497	198
LierIES.PTET51.1.048740.34685.34713	NODE_7098_length_48687_cov_21.048740	34685	34713	29
LierIES.PTET51.1.920475.1414.1441	NODE_7511_length_10764_cov_26.920475	1414	1441	28
LierIES.PTET51.1.643639.18625.18672	NODE_7545_length_24391_cov_21.643639	18625	18672	48
LierIES.PTET51.1.509493.147611.147655	NODE_7958_length_195367_cov_19.509493	147611	147655	45
LierIES.PTET51.1.681425.7065.7094	NODE_8101_length_31214_cov_19.681425	7065	7094	30
LierIES.PTET51.1.090513.8761.8790	NODE_8969_length_30581_cov_22.090513	8761	8790	30
LierIES.PTET51.1.081625.8780.8807	NODE_9050_length_16588_cov_20.081625	8780	8807	28
LierIES.PTET51.1.891239.968.1041	NODE_9229_length_15879_cov_18.891239	968	1041	74
LierIES.PTET51.1.515200.1413.1479	NODE_9445_length_24375_cov_20.515200	1413	1479	67
LierIES.PTET51.1.207754.23987.24012	NODE_9885_length_38281_cov_20.207754	23987	24012	26
LierIES.PTET51.1.980089.10060.10088	NODE_1409_length_18382_cov_26.980089	10060	10088	29
LierIES.PTET51.1.040161.1143.1220	NODE_14384_length_3884_cov_70.040161	1143	1220	78
LierIES.PTET51.1.076584.2957.2981	NODE_16636_length_11543_cov_19.076584	2957	2981	25
LierIES.PTET51.1.719164.10891.10963	NODE_19566_length_13061_cov_21.719164	10891	10963	73
LierIES.PTET51.1.323147.11942.11985	NODE_25756_length_36878_cov_29.323147	11942	11985	44
LierIES.PTET51.1.915102.3790.3865	NODE_28164_length_21567_cov_22.915102	3790	3865	76
LierIES.PTET51.1.464731.8635.8670	NODE_3220_length_16629_cov_22.464731	8635	8670	36
LierIES.PTET51.1.224611.194.221	NODE_34230_length_1349_cov_20.224611	194	221	28
LierIES.PTET51.1.196692.528.616	NODE_48560_length_1088_cov_19.196692	528	616	89
LierIES.PTET51.1.468672.5900.5928	NODE_5569_length_39070_cov_19.468672	5900	5928	29
LierIES.PTET51.1.896545.6890.6938	NODE_5783_length_11957_cov_20.896545	6890	6938	49
LierIES.PTET51.1.430889.763.786	NODE_66201_length_3574_cov_20.430889	763	786	24
LierIES.PTET51.1.584332.1300.1344	NODE_6864_length_13607_cov_21.584332	1300	1344	45
LierIES.PTET51.1.620720.26023.26196	NODE_7810_length_28090_cov_37.620720	26023	26196	174
LierIES.PTET51.1.938375.32471.32497	NODE_8628_length_36187_cov_19.938375	32471	32497	27
LierIES.PTET51.1.040253.13285.13362	NODE_41584_length_24172_cov_29.040253	13285	13362	78
LierIES.PTET51.1.479548.29537.29564	NODE_5729_length_33980_cov_21.479548	29537	29564	28
LierIES.PTET51.1.522993.3480.3524	NODE_6630_length_4958_cov_19.522993	3480	3524	45
LierIES.PTET51.1.195114.2883.2910	NODE_2385_length_27594_cov_40.195114	2883	2910	28
LierIES.PTET51.1.690201.2846.2873	NODE_666_length_5878_cov_22.690201	2846	2873	28
LierIES.PTET51.1.173733.2028.2053	NODE_19501_length_6769_cov_19.173733	2028	2053	26
LierIES.PTET51.1.731478.3230.3256	NODE_43725_length_5534_cov_22.731478	3230	3256	27
LierIES.PTET51.1.290735.8940.8966	NODE_4613_length_9985_cov_24.290735	8940	8966	27
